# Supplementary material
Source: PubMed Central journal article supplement (PMC8964015)
Supplement: mmc1.pdf [file mmc1.pdf]

## TRIPOD Checklist: Prediction Model Development and Validation.

| Section/Topic                |     | Checklist Item |                                                                                                                                                                                                                            | Page           |
|------------------------------|-----|----------------|----------------------------------------------------------------------------------------------------------------------------------------------------------------------------------------------------------------------------|----------------|
| <b>Title and abstract</b>    |     |                |                                                                                                                                                                                                                            |                |
| Title                        | 1   | D;V            | Identify the study as developing and/or validating a multivariable prediction model, the target population, and the outcome to be predicted.                                                                               | 1              |
| Abstract                     | 2   | D;V            | Provide a summary of objectives, study design, setting, participants, sample size, predictors, outcome, statistical analysis, results, and conclusions.                                                                    | 1              |
| <b>Introduction</b>          |     |                |                                                                                                                                                                                                                            |                |
| Background and objectives    | 3a  | D;V            | Explain the medical context (including whether diagnostic or prognostic) and rationale for developing or validating the multivariable prediction model, including references to existing models.                           | 2-4            |
|                              | 3b  | D;V            | Specify the objectives, including whether the study describes the development or validation of the model or both.                                                                                                          | 4              |
| <b>Methods</b>               |     |                |                                                                                                                                                                                                                            |                |
| Source of data               | 4a  | D;V            | Describe the study design or source of data (e.g., randomized trial, cohort, or registry data), separately for the development and validation data sets, if applicable.                                                    | 5              |
|                              | 4b  | D;V            | Specify the key study dates, including start of accrual; end of accrual; and, if applicable, end of follow-up.                                                                                                             | 6              |
| Participants                 | 5a  | D;V            | Specify key elements of the study setting (e.g., primary care, secondary care, general population) including number and location of centres.                                                                               | 6              |
|                              | 5b  | D;V            | Describe eligibility criteria for participants.                                                                                                                                                                            | 5              |
|                              | 5c  | D;V            | Give details of treatments received, if relevant.                                                                                                                                                                          | 6              |
| Outcome                      | 6a  | D;V            | Clearly define the outcome that is predicted by the prediction model, including how and when assessed.                                                                                                                     | 6              |
|                              | 6b  | D;V            | Report any actions to blind assessment of the outcome to be predicted.                                                                                                                                                     | 8-10           |
| Predictors                   | 7a  | D;V            | Clearly define all predictors used in developing or validating the multivariable prediction model, including how and when they were measured.                                                                              | 7              |
|                              | 7b  | D;V            | Report any actions to blind assessment of predictors for the outcome and other predictors.                                                                                                                                 | 8-10           |
| Sample size                  | 8   | D;V            | Explain how the study size was arrived at.                                                                                                                                                                                 | 5-6            |
| Missing data                 | 9   | D;V            | Describe how missing data were handled (e.g., complete-case analysis, single imputation, multiple imputation) with details of any imputation method.                                                                       | NA             |
| Statistical analysis methods | 10a | D              | Describe how predictors were handled in the analyses.                                                                                                                                                                      | 7              |
|                              | 10b | D              | Specify type of model, all model-building procedures (including any predictor selection), and method for internal validation.                                                                                              | 8-10           |
|                              | 10c | V              | For validation, describe how the predictions were calculated.                                                                                                                                                              | 8-10           |
|                              | 10d | D;V            | Specify all measures used to assess model performance and, if relevant, to compare multiple models.                                                                                                                        | 8-10           |
|                              | 10e | V              | Describe any model updating (e.g., recalibration) arising from the validation, if done.                                                                                                                                    | 8-9            |
| Risk groups                  | 11  | D;V            | Provide details on how risk groups were created, if done.                                                                                                                                                                  | 6-7            |
| Development vs. validation   | 12  | V              | For validation, identify any differences from the development data in setting, eligibility criteria, outcome, and predictors.                                                                                              | 8-9<br>Fig. 3  |
| <b>Results</b>               |     |                |                                                                                                                                                                                                                            |                |
| Participants                 | 13a | D;V            | Describe the flow of participants through the study, including the number of participants with and without the outcome and, if applicable, a summary of the follow-up time. A diagram may be helpful.                      | 5-6<br>Fig. 2  |
|                              | 13b | D;V            | Describe the characteristics of the participants (basic demographics, clinical features, available predictors), including the number of participants with missing data for predictors and outcome. Not mentioned in result | 5-6<br>Table 1 |
|                              | 13c | V              | For validation, show a comparison with the development data of the distribution of important variables (demographics, predictors and outcome).                                                                             | 10-12          |
| Model development            | 14a | D              | Specify the number of participants and outcome events in each analysis.                                                                                                                                                    | 5-6<br>Fig. 2  |
|                              | 14b | D              | If done, report the unadjusted association between each candidate predictor and outcome.                                                                                                                                   | 10             |
| Model specification          | 15a | D              | Present the full prediction model to allow predictions for individuals (i.e., all regression coefficients, and model intercept or baseline survival at a given time point).                                                | NA             |
|                              | 15b | D              | Explain how to use the prediction model.                                                                                                                                                                                   | 10-12          |
| Model performance            | 16  | D;V            | Report performance measures (with CIs) for the prediction model.                                                                                                                                                           | 10-12          |
| Model-updating               | 17  | V              | If done, report the results from any model updating (i.e., model specification, model performance).                                                                                                                        | 10-11          |
| <b>Discussion</b>            |     |                |                                                                                                                                                                                                                            |                |
| Limitations                  | 18  | D;V            | Discuss any limitations of the study (such as nonrepresentative sample, few events per predictor, missing data).                                                                                                           | 15             |
| Interpretation               | 19a | V              | For validation, discuss the results with reference to performance in the development data, and any other validation data.                                                                                                  | 12-14          |
|                              | 19b | D;V            | Give an overall interpretation of the results, considering objectives, limitations, results from similar studies, and other relevant evidence.                                                                             | 14-15          |
| Implications                 | 20  | D;V            | Discuss the potential clinical use of the model and implications for future research.                                                                                                                                      | 15-16          |
| <b>Other information</b>     |     |                |                                                                                                                                                                                                                            |                |
| Supplementary information    | 21  | D;V            | Provide information about the availability of supplementary resources, such as study protocol, Web calculator, and data sets.                                                                                              | 16             |
| Funding                      | 22  | D;V            | Give the source of funding and the role of the funders for the present study.                                                                                                                                              | 16             |

\*Items relevant only to the development of a prediction model are denoted by D, items relating solely to a validation of a prediction model are denoted by V, and items relating to both are denoted D;V. We recommend using the TRIPOD Checklist in conjunction with the TRIPOD Explanation and Elaboration document.

# Radiomics Quality Score - RQS

8/23/2021

RQS - Radiomics.world

Image protocol quality - well-documented image protocols (for example, contrast, slice thickness, energy, etc.) and/or usage of public image protocols allow reproducibility/replicability

protocols well documented

public protocol used

none

Multiple segmentations - possible actions are: segmentation by different physicians/algorithms/software, perturbing segmentations by (random) noise, segmentation at different breathing cycles. Analyse feature robustness to segmentation variabilities

yes

no

Phantom study on all scanners - detect inter-scanner differences and vendor-dependent features. Analyse feature robustness to these sources of variability

yes

no

Imaging at multiple time points - collect images of individuals at additional time points. Analyse feature robustness to temporal variabilities (for example, organ movement, organ expansion/shrinkage)

yes

no

Feature reduction or adjustment for multiple testing - decreases the risk of overfitting. Overfitting is inevitable if the number of features exceeds the number of samples. Consider feature robustness when selecting features

Either measure is implemented

Neither measure is implemented

Multivariable analysis with non radiomics features (for example, EGFR mutation) - is expected to provide a more holistic model. Permits correlating/inferencing between radiomics and non radiomics features

yes

no

Detect and discuss biological correlates - demonstration of phenotypic differences (possibly associated with underlying gene-protein expression patterns) deepens understanding of radiomics and biology

yes

no

Cut-off analyses - determine risk groups by either the median, a previously published cut-off or report a continuous risk variable. Reduces the risk of reporting overly optimistic results

yes

no

Discrimination statistics - report discrimination statistics (for example, C-statistic, ROC curve, AUC) and their statistical significance (for example, p-values, confidence intervals). One can also apply resampling method (for example, bootstrapping, cross-validation)

a discrimination statistic and its statistical significance are reported

a resampling method technique is also applied

none

Calibration statistics - report calibration statistics (for example, Calibration-in-the-large/slope, calibration plots) and their statistical significance (for example, P-values, confidence intervals). One can also apply resampling method (for example, bootstrapping, cross-validation)

a calibration statistic and its statistical significance are reported

a resampling method technique is applied

none

Prospective study registered in a trial database - provides the highest level of evidence supporting the clinical validity and usefulness of the radiomics biomarker

yes

no

Validation - the validation is performed without retraining and without adaptation of the cut-off value, provides crucial information with regard to credible clinical performance

No validation

validation is based on a dataset from the same institute

validation is based on a dataset from another institute

validation is based on two datasets from two distinct institutes

the study validates a previously published signature

validation is based on three or more datasets from distinct institutes

Comparison to 'gold standard' - assess the extent to which the model agrees with/is superior to the current 'gold standard' method (for example, TNM-staging for survival prediction). This comparison shows the added value of radiomics

yes

no

Potential clinical utility - report on the current and potential application of the model in a clinical setting (for example, decision curve analysis).

yes

no

Cost-effectiveness analysis - report on the cost-effectiveness of the clinical application (for example, QALYs generated)

yes

no

Open science and data - make code and data publicly available. Open science facilitates knowledge transfer and reproducibility of the study

scans are open source

region of interest segmentations are open source

the code is open sourced

radiomics features are calculated on a set of representative ROIs and the calculated features and representative ROIs are open source

Total score

30  
(83.33%)

## CLAIM: Checklist for Artificial Intelligence in Medical Imaging

| Section / Topic          | No. | Item                                                                                                                                                                                                                |    |
|--------------------------|-----|---------------------------------------------------------------------------------------------------------------------------------------------------------------------------------------------------------------------|----|
| <b>TITLE / ABSTRACT</b>  |     |                                                                                                                                                                                                                     |    |
|                          | 1   | Identification as a study of AI methodology, specifying the category of technology used (e.g., deep learning)                                                                                                       | ✓  |
|                          | 2   | Structured summary of study design, methods, results, and conclusions                                                                                                                                               | ✓  |
| <b>INTRODUCTION</b>      |     |                                                                                                                                                                                                                     |    |
|                          | 3   | Scientific and clinical background, including the intended use and clinical role of the AI approach                                                                                                                 | ✓  |
|                          | 4   | Study objectives and hypotheses                                                                                                                                                                                     | ✓  |
| <b>METHODS</b>           |     |                                                                                                                                                                                                                     |    |
| <i>Study Design</i>      | 5   | Prospective or retrospective study                                                                                                                                                                                  | ✓  |
|                          | 6   | Study goal, such as model creation, exploratory study, feasibility study, non-inferiority trial                                                                                                                     | ✓  |
| <i>Data</i>              | 7   | Data sources                                                                                                                                                                                                        | ✓  |
|                          | 8   | Eligibility criteria: how, where, and when potentially eligible participants or studies were identified (e.g., symptoms, results from previous tests, inclusion in registry, patient-care setting, location, dates) | ✓  |
|                          | 9   | Data pre-processing steps                                                                                                                                                                                           | ✓  |
|                          | 10  | Selection of data subsets, if applicable                                                                                                                                                                            | ✓  |
|                          | 11  | Definitions of data elements, with references to Common Data Elements                                                                                                                                               | ✓  |
|                          | 12  | De-identification methods                                                                                                                                                                                           | ✓  |
|                          | 13  | How missing data were handled                                                                                                                                                                                       | ✓  |
| <i>Ground Truth</i>      | 14  | Definition of ground truth reference standard, in sufficient detail to allow replication                                                                                                                            | ✓  |
|                          | 15  | Rationale for choosing the reference standard (if alternatives exist)                                                                                                                                               | ✓  |
|                          | 16  | Source of ground-truth annotations; qualifications and preparation of annotators                                                                                                                                    | ✓  |
|                          | 17  | Annotation tools                                                                                                                                                                                                    | ✓  |
|                          | 18  | Measurement of inter- and intrarater variability; methods to mitigate variability and/or resolve discrepancies                                                                                                      | NA |
| <i>Data Partitions</i>   | 19  | Intended sample size and how it was determined                                                                                                                                                                      | ✓  |
|                          | 20  | How data were assigned to partitions; specify proportions                                                                                                                                                           | ✓  |
|                          | 21  | Level at which partitions are disjoint (e.g., image, study, patient, institution)                                                                                                                                   | ✓  |
| <i>Model</i>             | 22  | Detailed description of model, including inputs, outputs, all intermediate layers and connections                                                                                                                   | ✓  |
|                          | 23  | Software libraries, frameworks, and packages                                                                                                                                                                        | ✓  |
|                          | 24  | Initialization of model parameters (e.g., randomization, transfer learning)                                                                                                                                         | ✓  |
| <i>Training</i>          | 25  | Details of training approach, including data augmentation, hyperparameters, number of models trained                                                                                                                | ✓  |
|                          | 26  | Method of selecting the final model                                                                                                                                                                                 | ✓  |
|                          | 27  | Ensembling techniques, if applicable                                                                                                                                                                                | ✓  |
| <i>Evaluation</i>        | 28  | Metrics of model performance                                                                                                                                                                                        | ✓  |
|                          | 29  | Statistical measures of significance and uncertainty (e.g., confidence intervals)                                                                                                                                   | ✓  |
|                          | 30  | Robustness or sensitivity analysis                                                                                                                                                                                  | ✓  |
|                          | 31  | Methods for explainability or interpretability (e.g., saliency maps), and how they were validated                                                                                                                   | NA |
|                          | 32  | Validation or testing on external data                                                                                                                                                                              | ✓  |
| <b>RESULTS</b>           |     |                                                                                                                                                                                                                     |    |
| <i>Data</i>              | 33  | Flow of participants or cases, using a diagram to indicate inclusion and exclusion                                                                                                                                  | ✓  |
|                          | 34  | Demographic and clinical characteristics of cases in each partition                                                                                                                                                 | ✓  |
| <i>Model performance</i> | 35  | Performance metrics for optimal model(s) on all data partitions                                                                                                                                                     | ✓  |
|                          | 36  | Estimates of diagnostic accuracy and their precision (such as 95% confidence intervals)                                                                                                                             | ✓  |
|                          | 37  | Failure analysis of incorrectly classified cases                                                                                                                                                                    | NA |
| <b>DISCUSSION</b>        |     |                                                                                                                                                                                                                     |    |
|                          | 38  | Study limitations, including potential bias, statistical uncertainty, and generalizability                                                                                                                          | ✓  |
|                          | 39  | Implications for practice, including the intended use and/or clinical role                                                                                                                                          | ✓  |
| <b>OTHER INFORMATION</b> |     |                                                                                                                                                                                                                     |    |
|                          | 40  | Registration number and name of registry                                                                                                                                                                            | ✓  |
|                          | 41  | Where the full study protocol can be accessed                                                                                                                                                                       | ✓  |
|                          | 42  | Sources of funding and other support; role of funders                                                                                                                                                               | ✓  |



## **Supplemental Figures and Tables**



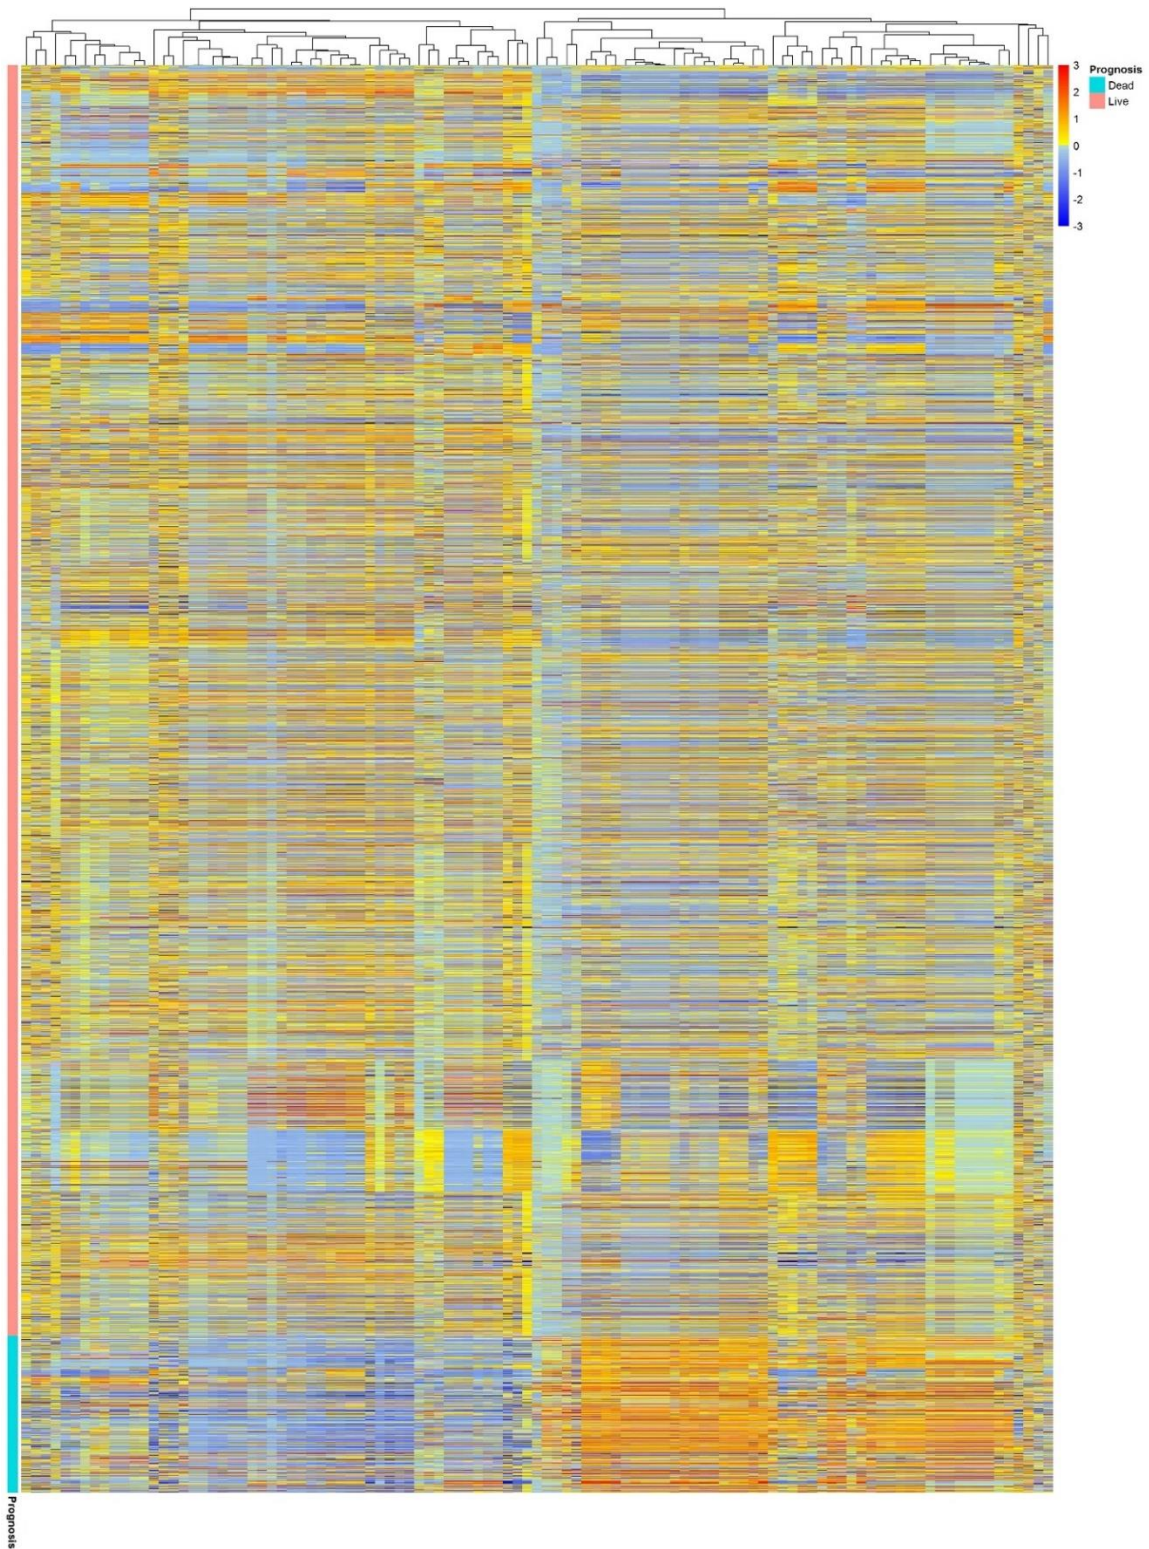

**Supplemental Figure 1.** Cluster heat map of radiomics features in the non-harmonized data set. [This illustration demonstrates that clustering cannot depict significant correlation or cluster in alive and deceased](#)





**Supplemental Table 1.** P-values in Kruskal Wallis analysis of radiomics features before and after ComBat Harmonization.

| Shape              | Before | After     | FO                  | Before | After    | GLCM               | Before | After    | GLRLM         | Before | After     | GLSZM         | Before | After     | GLDM                    | Before | After     |
|--------------------|--------|-----------|---------------------|--------|----------|--------------------|--------|----------|---------------|--------|-----------|---------------|--------|-----------|-------------------------|--------|-----------|
| <b>Elongation</b>  | 1E-340 | 0.01      | <b>10Percentile</b> | 1E-340 | 0.90     | <b>AC</b>          | 1E-340 | 3.14E-35 | <b>GLNU</b>   | 1E-340 | 0.76      | <b>GLNU</b>   | 1E-340 | 0.533587  | <b>DE</b>               | 1E-340 | 0.38      |
| <b>Flatness</b>    | 1E-340 | 2.09E-28  | <b>90Percentile</b> | 1E-340 | 0.78     | <b>CP</b>          | 1E-340 | 4.16E-62 | <b>GLNUN</b>  | 1E-340 | 0.93      | <b>GLNUN</b>  | 1E-340 | 0.038013  | <b>DNU</b>              | 1E-340 | 2.18E-18  |
| <b>LeastAxis</b>   | 1E-340 | 2.13E-34  | <b>Energy</b>       | 1E-340 | 0.96     | <b>CS</b>          | 1E-340 | 4.98E-09 | <b>GLV</b>    | 1E-340 | 0.97      | <b>GLV</b>    | 1E-340 | 6.14E-13  | <b>DNUN</b>             | 1E-340 | 0.99      |
| <b>MajorAxis</b>   | 1E-340 | 0.92      | <b>Entropy</b>      | 1E-340 | 0.99     | <b>CT</b>          | 1E-340 | 0.93     | <b>HGLRE</b>  | 1E-340 | 1.04E-21  | <b>HGLZE</b>  | 1E-340 | 5.46E-07  | <b>DV</b>               | 1E-340 | 0.06      |
| <b>M2DDC</b>       | 1E-340 | 1.36E-110 | <b>IQR</b>          | 1E-340 | 0.99     | <b>Contrast</b>    | 1E-340 | 0.95     | <b>LRE</b>    | 1E-340 | 0.99      | <b>LAE</b>    | 1E-340 | 1.14E-19  | <b>GLNU</b>             | 1E-340 | 0.01      |
| <b>M2DDR</b>       | 1E-340 | 2.74E-93  | <b>Kurtosis</b>     | 1E-340 | 7.95E-13 | <b>Correlation</b> | 1E-340 | 0.89     | <b>LRHGLE</b> | 1E-340 | 3.66E-112 | <b>LAHGLE</b> | 1E-340 | 2.10E-64  | <b>GLV</b>              | 1E-340 | 0.98      |
| <b>M2DDS</b>       | 1E-340 | 0.54      | <b>MAD</b>          | 1E-340 | 0.99     | <b>DA</b>          | 1E-340 | 0.99     | <b>LRHGLE</b> | 1E-340 | 2.84E-42  | <b>LALGLE</b> | 1E-340 | 1.29E-156 | <b>HGLE</b>             | 1E-340 | 1.07E-29  |
| <b>M3DD</b>        | 1E-340 | 1.54E-06  | <b>Mean</b>         | 1E-340 | 0.99     | <b>DE</b>          | 1E-340 | 0.99     | <b>LGLRE</b>  | 1E-340 | 0.39      | <b>LGLZE</b>  | 1E-340 | 0.25      | <b>LDE</b>              | 1E-340 | 0.96      |
| <b>MeshVolume</b>  | 1E-340 | 2.22E-05  | <b>Median</b>       | 1E-340 | 0.99     | <b>DV</b>          | 1E-340 | 0.06     | <b>RE</b>     | 1E-340 | 0.90      | <b>SZNU</b>   | 1E-340 | 0.01      | <b>LDHGLE</b>           | 1E-340 | 1.76E-144 |
| <b>MinorAxis</b>   | 1E-340 | 8.82E-10  | <b>Range</b>        | 1E-340 | 1.56E-06 | <b>ID</b>          | 1E-340 | 0.99     | <b>RLNU</b>   | 1E-340 | 1.80E-12  | <b>SZNUN</b>  | 1E-340 | 0.63      | <b>LDLGLE</b>           | 1E-340 | 1.68E-05  |
| <b>Sphericity</b>  | 1E-340 | 3.92E-07  | <b>RMAD</b>         | 1E-340 | 0.99     | <b>IDM</b>         | 1E-340 | 0.99     | <b>RLNUN</b>  | 1E-340 | 0.99      | <b>SAE</b>    | 1E-340 | 2.56E-18  | <b>LGLE</b>             | 1E-340 | 0.23      |
| <b>SurfaceArea</b> | 1E-340 | 3.02E-22  | <b>RMS</b>          | 1E-340 | 0.99     | <b>IDMN</b>        | 1E-340 | 0.62     | <b>RP</b>     | 1E-340 | 0.97      | <b>SAHGLE</b> | 1E-340 | 2.00E-48  | <b>SDE</b>              | 1E-340 | 4.03E-15  |
| <b>SVR</b>         | 1E-340 | 9.54E-07  | <b>Skewness</b>     | 1E-340 | 0.99     | <b>IDN</b>         | 1E-340 | 0.93     | <b>RV</b>     | 1E-340 | 0.87      | <b>SALGLE</b> | 1E-340 | 0.01      | <b>SDHGLE</b>           | 1E-340 | 1.73E-13  |
| <b>VoxelVolume</b> | 1E-340 | 2.21E-05  | <b>TE</b>           | 1E-340 | 0.96     | <b>IMC1</b>        | 1E-340 | 0.58     | <b>SRE</b>    | 1E-340 | 0.97      | <b>ZE</b>     | 1E-340 | 0.88      | <b>SDLGLE</b>           | 1E-340 | 0.01      |
|                    |        |           | <b>Uniformity</b>   | 1E-340 | 0.99     | <b>IMC2</b>        | 1E-340 | 0.88     | <b>SRHGLE</b> | 1E-340 | 1.36E-16  | <b>ZP</b>     | 1E-340 | 1.16E-08  | <b>NGTDM_Busyness</b>   | 1E-340 | 0.40      |
|                    |        |           | <b>Variance</b>     | 1E-340 | 0.98     | <b>IV</b>          | 1E-340 | 0.20     | <b>SRLGLE</b> | 1E-340 | 0.17      | <b>ZV</b>     | 1E-340 | 1.13E-19  | <b>NGTDM_Coarseness</b> | 1E-340 | 0.69      |
|                    |        |           |                     |        |          | <b>JA</b>          | 1E-340 | 0.13     |               |        |           |               |        |           | <b>NGTDM_Complexity</b> | 1E-340 | 3.17E-09  |
|                    |        |           |                     |        |          | <b>JEnergy</b>     | 1E-340 | 1        |               |        |           |               |        |           | <b>NGTDM_Contrast</b>   | 1E-340 | 0.81      |
|                    |        |           |                     |        |          | <b>JEntropy</b>    | 1E-340 | 0.99     |               |        |           |               |        |           | <b>NGTDM_Strength</b>   | 1E-340 | 4.31E-17  |
|                    |        |           |                     |        |          | <b>MCC</b>         | 1E-340 | 0.69     |               |        |           |               |        |           |                         |        |           |
|                    |        |           |                     |        |          | <b>MP</b>          | 1E-340 | 0.99     |               |        |           |               |        |           |                         |        |           |
|                    |        |           |                     |        |          | <b>SA</b>          | 1E-340 | 0.13     |               |        |           |               |        |           |                         |        |           |
|                    |        |           |                     |        |          | <b>SE</b>          | 1E-340 | 0.99     |               |        |           |               |        |           |                         |        |           |
|                    |        |           |                     |        |          | <b>SS</b>          | 1E-340 | 0.95     |               |        |           |               |        |           |                         |        |           |

**Supplemental Table 2.** Classification performance indices for different feature selectors (FS) and classifiers in Strategy 1.

| <b>FS</b>     | <b>Classifier</b> | <b>AUC</b> | <b>95% CIs</b> | <b>Std</b> | <b>Acc</b> | <b>Sen</b> | <b>Spe</b> |
|---------------|-------------------|------------|----------------|------------|------------|------------|------------|
| <b>ANOVA</b>  | RF                | 0.83       | [0.81-0.85]    | 0.010      | 0.74       | 0.79       | 0.74       |
|               | AB                | 0.81       | [0.79-0.83]    | 0.011      | 0.73       | 0.74       | 0.73       |
|               | AE                | 0.83       | [0.81-0.85]    | 0.010      | 0.74       | 0.78       | 0.74       |
|               | LDA               | 0.82       | [0.80-0.84]    | 0.011      | 0.73       | 0.77       | 0.73       |
|               | LR                | 0.82       | [0.80-0.84]    | 0.010      | 0.75       | 0.77       | 0.75       |
|               | LASSO             | 0.82       | [0.80-0.84]    | 0.010      | 0.76       | 0.76       | 0.76       |
|               | NB                | 0.80       | [0.78-0.82]    | 0.011      | 0.73       | 0.75       | 0.73       |
| <b>KW</b>     | RF                | 0.83       | [0.81-0.85]    | 0.010      | 0.74       | 0.79       | 0.74       |
|               | AB                | 0.80       | [0.78-0.82]    | 0.011      | 0.75       | 0.75       | 0.75       |
|               | AE                | 0.83       | [0.81-0.85]    | 0.010      | 0.76       | 0.76       | 0.76       |
|               | LDA               | 0.82       | [0.80-0.84]    | 0.011      | 0.74       | 0.77       | 0.74       |
|               | LR                | 0.82       | [0.80-0.84]    | 0.010      | 0.75       | 0.77       | 0.74       |
|               | LASSO             | 0.83       | [0.81-0.84]    | 0.010      | 0.75       | 0.77       | 0.75       |
|               | NB                | 0.80       | [0.78-0.82]    | 0.011      | 0.73       | 0.74       | 0.73       |
| <b>Relief</b> | RF                | 0.84       | [0.82-0.85]    | 0.010      | 0.76       | 0.77       | 0.76       |
|               | AB                | 0.81       | [0.79-0.83]    | 0.010      | 0.73       | 0.75       | 0.73       |
|               | AE                | 0.83       | [0.81-0.84]    | 0.010      | 0.76       | 0.76       | 0.76       |
|               | LDA               | 0.82       | [0.79-0.84]    | 0.011      | 0.75       | 0.76       | 0.75       |
|               | LR                | 0.82       | [0.80-0.84]    | 0.010      | 0.73       | 0.77       | 0.73       |
|               | LASSO             | 0.83       | [0.81-0.85]    | 0.010      | 0.76       | 0.76       | 0.76       |
|               | NB                | 0.79       | [0.77-0.82]    | 0.011      | 0.76       | 0.70       | 0.77       |
| <b>RFE</b>    | RF                | 0.84       | [0.82-0.85]    | 0.010      | 0.76       | 0.78       | 0.76       |
|               | AB                | 0.81       | [0.79-0.83]    | 0.010      | 0.73       | 0.75       | 0.73       |
|               | AE                | 0.83       | [0.81-0.85]    | 0.010      | 0.74       | 0.78       | 0.74       |
|               | LDA               | 0.82       | [0.79-0.84]    | 0.011      | 0.74       | 0.77       | 0.74       |
|               | LR                | 0.82       | [0.80-0.84]    | 0.010      | 0.74       | 0.76       | 0.74       |
|               | LASSO             | 0.83       | [0.81-0.85]    | 0.010      | 0.75       | 0.77       | 0.75       |
|               | NB                | 0.79       | [0.77-0.81]    | 0.011      | 0.71       | 0.74       | 0.71       |

**Supplemental Table 3.** Classification performance indices for different feature selectors (FS) and classifiers in Strategy 2.

| <b>FS</b>     | <b>Classifier</b> | <b>AUC</b> | <b>95% CIs</b> | <b>Std</b> | <b>Acc</b> | <b>Sen</b> | <b>Spe</b> |
|---------------|-------------------|------------|----------------|------------|------------|------------|------------|
| <b>ANOVA</b>  | RF                | 0.84       | [0.82-0.86]    | 0.011      | 0.76       | 0.78       | 0.76       |
|               | AB                | 0.83       | [0.80-0.85]    | 0.010      | 0.76       | 0.76       | 0.76       |
|               | AE                | 0.84       | [0.82-0.86]    | 0.010      | 0.75       | 0.79       | 0.75       |
|               | LDA               | 0.81       | [0.79-0.84]    | 0.011      | 0.74       | 0.76       | 0.74       |
|               | LR                | 0.82       | [0.80-0.84]    | 0.010      | 0.75       | 0.76       | 0.75       |
|               | LASSO             | 0.83       | [0.81-0.85]    | 0.010      | 0.75       | 0.77       | 0.75       |
|               | NB                | 0.81       | [0.78-0.83]    | 0.011      | 0.73       | 0.77       | 0.73       |
| <b>KW</b>     | RF                | 0.84       | [0.82-0.86]    | 0.010      | 0.76       | 0.81       | 0.76       |
|               | AB                | 0.81       | [0.79-0.83]    | 0.011      | 0.73       | 0.76       | 0.73       |
|               | AE                | 0.82       | [0.80-0.84]    | 0.010      | 0.74       | 0.77       | 0.74       |
|               | LDA               | 0.82       | [0.80-0.84]    | 0.011      | 0.75       | 0.77       | 0.75       |
|               | LR                | 0.83       | [0.80-0.85]    | 0.010      | 0.76       | 0.76       | 0.76       |
|               | LASSO             | 0.83       | [0.80-0.85]    | 0.011      | 0.76       | 0.76       | 0.76       |
|               | NB                | 0.81       | [0.78-0.83]    | 0.011      | 0.74       | 0.77       | 0.73       |
| <b>Relief</b> | RF                | 0.84       | [0.82-0.86]    | 0.011      | 0.77       | 0.79       | 0.76       |
|               | AB                | 0.83       | [0.81-0.85]    | 0.010      | 0.75       | 0.78       | 0.74       |
|               | AE                | 0.84       | [0.82-0.86]    | 0.010      | 0.75       | 0.78       | 0.75       |
|               | LDA               | 0.82       | [0.80-0.84]    | 0.011      | 0.75       | 0.78       | 0.74       |
|               | LR                | 0.82       | [0.79-0.84]    | 0.011      | 0.74       | 0.76       | 0.74       |
|               | LASSO             | 0.83       | [0.81-0.85]    | 0.010      | 0.76       | 0.79       | 0.75       |
|               | NB                | 0.80       | [0.78-0.82]    | 0.012      | 0.75       | 0.73       | 0.75       |
| <b>RFE</b>    | RF                | 0.84       | [0.82-0.86]    | 0.011      | 0.75       | 0.79       | 0.75       |
|               | AB                | 0.83       | [0.81-0.85]    | 0.010      | 0.74       | 0.79       | 0.74       |
|               | AE                | 0.83       | [0.81-0.85]    | 0.010      | 0.76       | 0.77       | 0.76       |
|               | LDA               | 0.82       | [0.80-0.84]    | 0.011      | 0.74       | 0.77       | 0.74       |
|               | LR                | 0.83       | [0.81-0.85]    | 0.010      | 0.75       | 0.77       | 0.75       |
|               | LASSO             | 0.83       | [0.81-0.85]    | 0.010      | 0.75       | 0.76       | 0.75       |
|               | NB                | 0.80       | [0.78-0.83]    | 0.012      | 0.75       | 0.75       | 0.74       |

**Supplemental Table 4.** Classification performance indices for different feature selectors (FS) and classifiers in Strategy 3.

| <b>FS</b>     | <b>Classifie</b> | <b>AUC</b> | <b>95% CIs</b> | <b>Std</b> | <b>Acc</b> | <b>Sen</b> | <b>Spe</b> |
|---------------|------------------|------------|----------------|------------|------------|------------|------------|
| <b>ANOVA</b>  | RF               | 0.83       | [0.81-0.85]    | 0.010      | 0.73       | 0.81       | 0.72       |
|               | AB               | 0.81       | [0.79-0.83]    | 0.010      | 0.69       | 0.81       | 0.68       |
|               | AE               | 0.83       | [0.81-0.85]    | 0.010      | 0.73       | 0.80       | 0.72       |
|               | LDA              | 0.81       | [0.79-0.83]    | 0.012      | 0.75       | 0.75       | 0.75       |
|               | LR               | 0.82       | [0.8-0.84]     | 0.010      | 0.71       | 0.81       | 0.70       |
|               | LASSO            | 0.83       | [0.81-0.85]    | 0.010      | 0.73       | 0.80       | 0.72       |
|               | NB               | 0.80       | [0.77-0.82]    | 0.011      | 0.77       | 0.71       | 0.78       |
| <b>KW</b>     | RF               | 0.81       | [0.79-0.83]    | 0.011      | 0.73       | 0.75       | 0.72       |
|               | AB               | 0.80       | [0.77-0.82]    | 0.011      | 0.73       | 0.75       | 0.72       |
|               | AE               | 0.80       | [0.78-0.82]    | 0.011      | 0.71       | 0.77       | 0.70       |
|               | LDA              | 0.82       | [0.80-0.84]    | 0.010      | 0.73       | 0.80       | 0.72       |
|               | LR               | 0.81       | [0.79-0.83]    | 0.011      | 0.75       | 0.76       | 0.74       |
|               | LASSO            | 0.83       | [0.81-0.85]    | 0.010      | 0.74       | 0.76       | 0.74       |
|               | NB               | 0.79       | [0.77-0.81]    | 0.011      | 0.76       | 0.71       | 0.77       |
| <b>Relief</b> | RF               | 0.83       | [0.81-0.85]    | 0.010      | 0.76       | 0.77       | 0.76       |
|               | AB               | 0.81       | [0.79-0.83]    | 0.010      | 0.75       | 0.73       | 0.75       |
|               | AE               | 0.83       | [0.82-0.85]    | 0.009      | 0.78       | 0.74       | 0.79       |
|               | LDA              | 0.81       | [0.79-0.83]    | 0.011      | 0.77       | 0.75       | 0.77       |
|               | LR               | 0.81       | [0.79-0.83]    | 0.011      | 0.73       | 0.76       | 0.73       |
|               | LASSO            | 0.82       | [0.80-0.84]    | 0.011      | 0.76       | 0.76       | 0.75       |
|               | NB               | 0.79       | [0.76-0.81]    | 0.012      | 0.74       | 0.72       | 0.74       |
| <b>RFE</b>    | RF               | 0.83       | [0.82-0.85]    | 0.010      | 0.75       | 0.77       | 0.74       |
|               | AB               | 0.81       | [0.79-0.83]    | 0.011      | 0.75       | 0.74       | 0.75       |
|               | AE               | 0.83       | [0.81-0.85]    | 0.010      | 0.76       | 0.77       | 0.76       |
|               | LDA              | 0.81       | [0.79-0.83]    | 0.011      | 0.75       | 0.75       | 0.75       |
|               | LR               | 0.82       | [0.79-0.84]    | 0.011      | 0.74       | 0.76       | 0.74       |
|               | LASSO            | 0.82       | [0.80-0.84]    | 0.010      | 0.76       | 0.75       | 0.77       |
|               | NB               | 0.79       | [0.77-0.81]    | 0.011      | 0.72       | 0.73       | 0.72       |



**Supplemental Table 5.** Classification performance indices for different feature selectors (FS) and classifiers in Strategy 4.

| <b>FS</b>     | <b>Classifier</b> | <b>AUC</b> | <b>95% CIs</b> | <b>Std</b> | <b>Acc</b> | <b>Sen</b> | <b>Spe</b> |
|---------------|-------------------|------------|----------------|------------|------------|------------|------------|
| <b>ANOVA</b>  | RF                | 0.84       | [0.82-0.85]    | 0.010      | 0.7477     | 0.79       | 0.74       |
|               | AB                | 0.82       | [0.80-0.84]    | 0.010      | 0.7483     | 0.75       | 0.75       |
|               | AE                | 0.84       | [0.82-0.86]    | 0.009      | 0.7354     | 0.81       | 0.72       |
|               | LDA               | 0.82       | [0.80-0.84]    | 0.011      | 0.7458     | 0.78       | 0.74       |
|               | LR                | 0.83       | [0.81-0.85]    | 0.010      | 0.7285     | 0.80       | 0.72       |
|               | LASSO             | 0.83       | [0.81-0.85]    | 0.010      | 0.751      | 0.79       | 0.75       |
|               | NB                | 0.80       | [0.78-0.82]    | 0.011      | 0.7389     | 0.75       | 0.74       |
| <b>KW</b>     | RF                | 0.84       | [0.82-0.85]    | 0.010      | 0.7491     | 0.79       | 0.74       |
|               | AB                | 0.82       | [0.80-0.84]    | 0.010      | 0.7497     | 0.77       | 0.75       |
|               | AE                | 0.84       | [0.82-0.86]    | 0.009      | 0.7684     | 0.77       | 0.77       |
|               | LDA               | 0.82       | [0.80-0.84]    | 0.011      | 0.7461     | 0.78       | 0.74       |
|               | LR                | 0.82       | [0.80-0.84]    | 0.010      | 0.7461     | 0.77       | 0.74       |
|               | LASSO             | 0.83       | [0.81-0.85]    | 0.010      | 0.7574     | 0.78       | 0.75       |
|               | NB                | 0.80       | [0.78-0.82]    | 0.011      | 0.734      | 0.75       | 0.73       |
| <b>Relief</b> | RF                | 0.83       | [0.81-0.85]    | 0.010      | 0.7475     | 0.79       | 0.74       |
|               | AB                | 0.81       | [0.79-0.83]    | 0.010      | 0.7494     | 0.75       | 0.75       |
|               | AE                | 0.83       | [0.81-0.85]    | 0.010      | 0.7494     | 0.80       | 0.74       |
|               | LDA               | 0.82       | [0.80-0.84]    | 0.011      | 0.7428     | 0.79       | 0.74       |
|               | LR                | 0.82       | [0.80-0.84]    | 0.010      | 0.7409     | 0.78       | 0.73       |
|               | LASSO             | 0.83       | [0.81-0.85]    | 0.010      | 0.7466     | 0.81       | 0.74       |
|               | NB                | 0.79       | [0.76-0.81]    | 0.011      | 0.7494     | 0.71       | 0.76       |
| <b>RFE</b>    | RF                | 0.84       | [0.82-0.85]    | 0.010      | 0.7384     | 0.80       | 0.73       |
|               | AB                | 0.83       | [0.81-0.84]    | 0.010      | 0.7422     | 0.78       | 0.74       |
|               | AE                | 0.83       | [0.81-0.85]    | 0.010      | 0.7618     | 0.79       | 0.76       |
|               | LDA               | 0.82       | [0.80-0.84]    | 0.011      | 0.7409     | 0.78       | 0.74       |
|               | LR                | 0.82       | [0.80-0.84]    | 0.010      | 0.7329     | 0.79       | 0.72       |
|               | LASSO             | 0.83       | [0.81-0.85]    | 0.010      | 0.7483     | 0.78       | 0.74       |
|               | NB                | 0.79       | [0.77-0.81]    | 0.011      | 0.7359     | 0.74       | 0.73       |

**Supplemental Table 6.** Classification performance indices for different feature selectors (FS) and classifiers in Strategy 5.

| <b>FS</b>     | <b>Classifier</b> | <b>AUC</b> | <b>95% CIs</b> | <b>Std</b> | <b>Acc</b> | <b>Sen</b> | <b>Spe</b> |
|---------------|-------------------|------------|----------------|------------|------------|------------|------------|
| <b>ANOVA</b>  | RF                | 0.83       | [0.81-0.85]    | 0.010      | 0.73       | 0.77       | 0.73       |
|               | AB                | 0.79       | [0.76-0.81]    | 0.012      | 0.74       | 0.72       | 0.75       |
|               | AE                | 0.82       | [0.79-0.84]    | 0.011      | 0.76       | 0.75       | 0.77       |
|               | LDA               | 0.77       | [0.74-0.79]    | 0.013      | 0.72       | 0.71       | 0.72       |
|               | LR                | 0.77       | [0.75-0.80]    | 0.012      | 0.72       | 0.73       | 0.72       |
|               | LASSO             | 0.77       | [0.75-0.80]    | 0.012      | 0.73       | 0.72       | 0.73       |
|               | NB                | 0.75       | [0.72-0.77]    | 0.013      | 0.72       | 0.70       | 0.72       |
| <b>KW</b>     | RF                | 0.82       | [0.80-0.84]    | 0.010      | 0.75       | 0.75       | 0.75       |
|               | AB                | 0.79       | [0.76-0.81]    | 0.012      | 0.73       | 0.72       | 0.73       |
|               | AE                | 0.81       | [0.79-0.83]    | 0.011      | 0.75       | 0.76       | 0.75       |
|               | LDA               | 0.77       | [0.74-0.79]    | 0.013      | 0.72       | 0.71       | 0.72       |
|               | LR                | 0.77       | [0.75-0.80]    | 0.012      | 0.71       | 0.73       | 0.71       |
|               | LASSO             | 0.77       | [0.75-0.80]    | 0.012      | 0.72       | 0.73       | 0.72       |
|               | NB                | 0.74       | [0.71-0.76]    | 0.013      | 0.68       | 0.71       | 0.68       |
| <b>Relief</b> | RF                | 0.83       | [0.81-0.85]    | 0.010      | 0.74       | 0.77       | 0.74       |
|               | AB                | 0.77       | [0.74-0.79]    | 0.012      | 0.71       | 0.72       | 0.71       |
|               | AE                | 0.79       | [0.77-0.81]    | 0.012      | 0.72       | 0.74       | 0.71       |
|               | LDA               | 0.76       | [0.74-0.78]    | 0.012      | 0.71       | 0.71       | 0.71       |
|               | LR                | 0.77       | [0.75-0.79]    | 0.012      | 0.71       | 0.74       | 0.71       |
|               | LASSO             | 0.77       | [0.75-0.80]    | 0.012      | 0.71       | 0.74       | 0.71       |
|               | NB                | 0.75       | [0.72-0.77]    | 0.013      | 0.66       | 0.75       | 0.65       |
| <b>RFE</b>    | RF                | 0.83       | [0.81-0.85]    | 0.010      | 0.74       | 0.76       | 0.74       |
|               | AB                | 0.78       | [0.76-0.80]    | 0.012      | 0.71       | 0.74       | 0.70       |
|               | AE                | 0.82       | [0.80-0.84]    | 0.011      | 0.75       | 0.75       | 0.75       |
|               | LDA               | 0.77       | [0.74-0.79]    | 0.013      | 0.72       | 0.71       | 0.72       |
|               | LR                | 0.77       | [0.75-0.80]    | 0.012      | 0.71       | 0.73       | 0.71       |
|               | LASSO             | 0.77       | [0.75-0.80]    | 0.012      | 0.73       | 0.72       | 0.73       |
|               | NB                | 0.75       | [0.72-0.77]    | 0.013      | 0.70       | 0.72       | 0.69       |

**Supplemental Table 7.** Classification performance indices of different feature selector and classifiers in Strategy 6.

| <b>FS</b>     | <b>Classifier</b> | <b>AUC</b> | <b>95% CIs</b> | <b>Std</b> | <b>Acc</b> | <b>Sen</b> | <b>Spe</b> |
|---------------|-------------------|------------|----------------|------------|------------|------------|------------|
| <b>ANOVA</b>  | RF                | 0.82       | [0.81-0.84]    | 0.010      | 0.76       | 0.76       | 0.77       |
|               | AB                | 0.78       | [0.76-0.81]    | 0.012      | 0.73       | 0.75       | 0.73       |
|               | AE                | 0.82       | [0.80-0.84]    | 0.010      | 0.73       | 0.77       | 0.73       |
|               | LDA               | 0.77       | [0.74-0.79]    | 0.012      | 0.72       | 0.72       | 0.72       |
|               | LR                | 0.78       | [0.75-0.80]    | 0.012      | 0.72       | 0.74       | 0.72       |
|               | LASSO             | 0.78       | [0.75-0.80]    | 0.013      | 0.74       | 0.74       | 0.74       |
|               | NB                | 0.76       | [0.73-0.78]    | 0.012      | 0.71       | 0.72       | 0.71       |
| <b>KW</b>     | RF                | 0.82       | [0.80-0.84]    | 0.010      | 0.74       | 0.79       | 0.73       |
|               | AB                | 0.79       | [0.76-0.81]    | 0.012      | 0.72       | 0.75       | 0.71       |
|               | AE                | 0.82       | [0.79-0.84]    | 0.011      | 0.73       | 0.78       | 0.73       |
|               | LDA               | 0.77       | [0.74-0.79]    | 0.013      | 0.71       | 0.73       | 0.71       |
|               | LR                | 0.78       | [0.75-0.80]    | 0.012      | 0.72       | 0.75       | 0.71       |
|               | LASSO             | 0.78       | [0.75-0.80]    | 0.013      | 0.72       | 0.75       | 0.71       |
|               | NB                | 0.76       | [0.74-0.78]    | 0.012      | 0.71       | 0.72       | 0.71       |
| <b>Relief</b> | RF                | 0.83       | [0.81-0.84]    | 0.010      | 0.73       | 0.79       | 0.72       |
|               | AB                | 0.78       | [0.76-0.81]    | 0.012      | 0.72       | 0.72       | 0.72       |
|               | AE                | 0.81       | [0.79-0.83]    | 0.011      | 0.74       | 0.75       | 0.73       |
|               | LDA               | 0.77       | [0.75-0.80]    | 0.013      | 0.72       | 0.74       | 0.72       |
|               | LR                | 0.78       | [0.75-0.80]    | 0.012      | 0.72       | 0.73       | 0.72       |
|               | LASSO             | 0.78       | [0.75-0.80]    | 0.013      | 0.72       | 0.74       | 0.71       |
|               | NB                | 0.75       | [0.73-0.78]    | 0.012      | 0.67       | 0.75       | 0.66       |
| <b>RFE</b>    | RF                | 0.83       | [0.80-0.84]    | 0.010      | 0.75       | 0.79       | 0.74       |
|               | AB                | 0.79       | [0.76-0.81]    | 0.012      | 0.73       | 0.74       | 0.73       |
|               | AE                | 0.82       | [0.80-0.84]    | 0.011      | 0.79       | 0.73       | 0.80       |
|               | LDA               | 0.76       | [0.74-0.79]    | 0.013      | 0.72       | 0.73       | 0.72       |
|               | LR                | 0.78       | [0.75-0.80]    | 0.012      | 0.71       | 0.75       | 0.71       |
|               | LASSO             | 0.78       | [0.75-0.80]    | 0.013      | 0.71       | 0.74       | 0.71       |
|               | NB                | 0.76       | [0.74-0.78]    | 0.012      | 0.71       | 0.71       | 0.71       |

**Supplemental Table 8.** Classification performance indices of different feature selector and classifiers in Strategy 7.

| <b>FS</b>     | <b>Classifier</b> | <b>AUC</b> | <b>95% CIs</b> | <b>Std</b> | <b>Acc</b> | <b>Sen</b> | <b>Spe</b> |
|---------------|-------------------|------------|----------------|------------|------------|------------|------------|
| <b>ANOVA</b>  | RF                | 0.78       | [0.76-0.80]    | 0.011      | 0.73       | 0.71       | 0.73       |
|               | AB                | 0.75       | [0.72-0.77]    | 0.012      | 0.67       | 0.73       | 0.66       |
|               | AE                | 0.78       | [0.76-0.80]    | 0.011      | 0.73       | 0.70       | 0.73       |
|               | LDA               | 0.76       | [0.73-0.78]    | 0.012      | 0.72       | 0.70       | 0.72       |
|               | LR                | 0.76       | [0.74-0.78]    | 0.012      | 0.71       | 0.71       | 0.71       |
|               | LASSO             | 0.76       | [0.74-0.79]    | 0.012      | 0.71       | 0.72       | 0.71       |
|               | NB                | 0.74       | [0.71-0.76]    | 0.013      | 0.70       | 0.70       | 0.70       |
| <b>KW</b>     | RF                | 0.78       | [0.76-0.80]    | 0.011      | 0.72       | 0.72       | 0.72       |
|               | AB                | 0.76       | [0.73-0.78]    | 0.012      | 0.71       | 0.70       | 0.71       |
|               | AE                | 0.77       | [0.75-0.80]    | 0.012      | 0.74       | 0.70       | 0.74       |
|               | LDA               | 0.76       | [0.74-0.79]    | 0.012      | 0.71       | 0.70       | 0.71       |
|               | LR                | 0.76       | [0.74-0.78]    | 0.012      | 0.75       | 0.67       | 0.76       |
|               | LASSO             | 0.77       | [0.74-0.79]    | 0.012      | 0.71       | 0.71       | 0.71       |
|               | NB                | 0.74       | [0.72-0.77]    | 0.013      | 0.74       | 0.65       | 0.75       |
| <b>Relief</b> | RF                | 0.78       | [0.76-0.80]    | 0.011      | 0.72       | 0.73       | 0.72       |
|               | AB                | 0.74       | [0.72-0.76]    | 0.012      | 0.68       | 0.72       | 0.67       |
|               | AE                | 0.76       | [0.74-0.79]    | 0.012      | 0.71       | 0.71       | 0.71       |
|               | LDA               | 0.75       | [0.73-0.78]    | 0.012      | 0.70       | 0.69       | 0.71       |
|               | LR                | 0.76       | [0.74-0.78]    | 0.012      | 0.73       | 0.67       | 0.74       |
|               | LASSO             | 0.77       | [0.74-0.79]    | 0.012      | 0.68       | 0.74       | 0.68       |
|               | NB                | 0.73       | [0.70-0.75]    | 0.013      | 0.72       | 0.67       | 0.72       |
| <b>RFE</b>    | RF                | 0.79       | [0.76-0.81]    | 0.011      | 0.71       | 0.73       | 0.71       |
|               | AB                | 0.75       | [0.72-0.77]    | 0.012      | 0.68       | 0.73       | 0.67       |
|               | AE                | 0.77       | [0.75-0.79]    | 0.012      | 0.71       | 0.73       | 0.70       |
|               | LDA               | 0.76       | [0.73-0.78]    | 0.012      | 0.71       | 0.71       | 0.70       |
|               | LR                | 0.76       | [0.74-0.79]    | 0.012      | 0.72       | 0.70       | 0.73       |
|               | LASSO             | 0.77       | [0.74-0.79]    | 0.012      | 0.71       | 0.71       | 0.71       |
|               | NB                | 0.74       | [0.72-0.77]    | 0.013      | 0.72       | 0.67       | 0.73       |



**Supplemental Table 9.** Classification performance indices of different feature selector and classifiers in Strategy 8.

| <b>FS</b>     | <b>Classifier</b> | <b>AUC</b>   | <b>Acc</b>   | <b>Sen</b>   | <b>Spe</b>   |
|---------------|-------------------|--------------|--------------|--------------|--------------|
| <b>ANOVA</b>  | RF                | 0.67 ± 0.072 | 0.61 ± 0.085 | 0.67 ± 0.058 | 0.6 ± 0.096  |
|               | AB                | 0.69 ± 0.064 | 0.65 ± 0.059 | 0.66 ± 0.059 | 0.64 ± 0.065 |
|               | AE                | 0.72 ± 0.073 | 0.66 ± 0.068 | 0.7 ± 0.069  | 0.65 ± 0.077 |
|               | LDA               | 0.71 ± 0.062 | 0.66 ± 0.058 | 0.69 ± 0.037 | 0.66 ± 0.063 |
|               | LR                | 0.74 ± 0.051 | 0.68 ± 0.047 | 0.71 ± 0.039 | 0.67 ± 0.051 |
|               | LASSO             | 0.74 ± 0.051 | 0.68 ± 0.042 | 0.71 ± 0.041 | 0.68 ± 0.045 |
|               | NB                | 0.74 ± 0.034 | 0.69 ± 0.03  | 0.71 ± 0.026 | 0.69 ± 0.033 |
| <b>KW</b>     | RF                | 0.67 ± 0.08  | 0.6 ± 0.09   | 0.67 ± 0.074 | 0.59 ± 0.1   |
|               | AB                | 0.68 ± 0.079 | 0.61 ± 0.064 | 0.69 ± 0.063 | 0.6 ± 0.068  |
|               | AE                | 0.72 ± 0.07  | 0.63 ± 0.097 | 0.73 ± 0.067 | 0.62 ± 0.11  |
|               | LDA               | 0.7 ± 0.074  | 0.65 ± 0.071 | 0.68 ± 0.05  | 0.64 ± 0.079 |
|               | LR                | 0.72 ± 0.066 | 0.65 ± 0.051 | 0.71 ± 0.037 | 0.65 ± 0.056 |
|               | LASSO             | 0.74 ± 0.053 | 0.67 ± 0.043 | 0.71 ± 0.039 | 0.67 ± 0.046 |
|               | NB                | 0.74 ± 0.059 | 0.69 ± 0.049 | 0.7 ± 0.043  | 0.69 ± 0.052 |
| <b>Relief</b> | RF                | 0.66 ± 0.066 | 0.59 ± 0.069 | 0.67 ± 0.057 | 0.58 ± 0.077 |
|               | AB                | 0.67 ± 0.062 | 0.58 ± 0.073 | 0.7 ± 0.079  | 0.57 ± 0.084 |
|               | AE                | 0.71 ± 0.057 | 0.62 ± 0.076 | 0.71 ± 0.039 | 0.61 ± 0.088 |
|               | LDA               | 0.69 ± 0.061 | 0.63 ± 0.05  | 0.67 ± 0.051 | 0.63 ± 0.052 |
|               | LR                | 0.71 ± 0.063 | 0.63 ± 0.068 | 0.71 ± 0.043 | 0.62 ± 0.077 |
|               | LASSO             | 0.7 ± 0.069  | 0.62 ± 0.064 | 0.71 ± 0.053 | 0.61 ± 0.07  |
|               | NB                | 0.64 ± 0.087 | 0.63 ± 0.1   | 0.61 ± 0.12  | 0.63 ± 0.12  |
| <b>RFE</b>    | RF                | 0.67 ± 0.071 | 0.6 ± 0.064  | 0.67 ± 0.053 | 0.6 ± 0.069  |
|               | AB                | 0.68 ± 0.049 | 0.6 ± 0.059  | 0.71 ± 0.058 | 0.58 ± 0.07  |
|               | AE                | 0.72 ± 0.066 | 0.63 ± 0.079 | 0.72 ± 0.029 | 0.62 ± 0.089 |
|               | LDA               | 0.68 ± 0.058 | 0.61 ± 0.06  | 0.7 ± 0.047  | 0.6 ± 0.069  |
|               | LR                | 0.7 ± 0.062  | 0.63 ± 0.059 | 0.7 ± 0.056  | 0.62 ± 0.067 |
|               | LASSO             | 0.7 ± 0.062  | 0.62 ± 0.056 | 0.7 ± 0.052  | 0.61 ± 0.063 |
|               | NB                | 0.67 ± 0.064 | 0.59 ± 0.099 | 0.72 ± 0.081 | 0.57 ± 0.12  |

**Supplemental Table 10.** Classification performance indices of different feature selector and classifiers in Strategy 9.

| <b>FS</b>     | <b>Classifier</b> | <b>AUC</b>   | <b>Acc</b>   | <b>Sen</b>   | <b>Spe</b>   |
|---------------|-------------------|--------------|--------------|--------------|--------------|
| <b>ANOVA</b>  | RF                | 0.79 ± 0.08  | 0.74 ± 0.079 | 0.77 ± 0.086 | 0.73 ± 0.078 |
|               | AB                | 0.79 ± 0.08  | 0.75 ± 0.073 | 0.77 ± 0.099 | 0.74 ± 0.074 |
|               | AE                | 0.80 ± 0.08  | 0.77 ± 0.075 | 0.78 ± 0.095 | 0.76 ± 0.078 |
|               | LDA               | 0.79 ± 0.08  | 0.76 ± 0.072 | 0.76 ± 0.1   | 0.75 ± 0.075 |
|               | LR                | 0.80 ± 0.08  | 0.76 ± 0.075 | 0.77 ± 0.11  | 0.76 ± 0.075 |
|               | LASSO             | 0.80 ± 0.08  | 0.75 ± 0.076 | 0.77 ± 0.099 | 0.75 ± 0.076 |
|               | NB                | 0.78 ± 0.08  | 0.75 ± 0.068 | 0.74 ± 0.11  | 0.76 ± 0.07  |
| <b>KW</b>     | RF                | 0.79 ± 0.08  | 0.72 ± 0.093 | 0.78 ± 0.11  | 0.71 ± 0.098 |
|               | AB                | 0.79 ± 0.086 | 0.74 ± 0.088 | 0.76 ± 0.16  | 0.74 ± 0.11  |
|               | AE                | 0.81 ± 0.083 | 0.73 ± 0.095 | 0.81 ± 0.13  | 0.73 ± 0.1   |
|               | LDA               | 0.80 ± 0.084 | 0.74 ± 0.092 | 0.77 ± 0.13  | 0.74 ± 0.11  |
|               | LR                | 0.80 ± 0.084 | 0.76 ± 0.085 | 0.76 ± 0.14  | 0.76 ± 0.097 |
|               | LASSO             | 0.80 ± 0.084 | 0.75 ± 0.095 | 0.77 ± 0.14  | 0.74 ± 0.11  |
|               | NB                | 0.78 ± 0.083 | 0.76 ± 0.07  | 0.75 ± 0.12  | 0.76 ± 0.074 |
| <b>Relief</b> | RF                | 0.79 ± 0.086 | 0.72 ± 0.098 | 0.79 ± 0.12  | 0.71 ± 0.1   |
|               | AB                | 0.79 ± 0.08  | 0.71 ± 0.092 | 0.81 ± 0.08  | 0.69 ± 0.1   |
|               | AE                | 0.8 ± 0.087  | 0.73 ± 0.093 | 0.8 ± 0.11   | 0.72 ± 0.1   |
|               | LDA               | 0.8 ± 0.084  | 0.73 ± 0.092 | 0.8 ± 0.11   | 0.72 ± 0.1   |
|               | LR                | 0.79 ± 0.077 | 0.74 ± 0.083 | 0.78 ± 0.11  | 0.74 ± 0.09  |
|               | LASSO             | 0.8 ± 0.086  | 0.75 ± 0.095 | 0.77 ± 0.13  | 0.74 ± 0.11  |
|               | NB                | 0.75 ± 0.075 | 0.73 ± 0.065 | 0.71 ± 0.11  | 0.74 ± 0.074 |
| <b>RFE</b>    | RF                | 0.79 ± 0.082 | 0.71 ± 0.089 | 0.8 ± 0.099  | 0.7 ± 0.096  |
|               | AB                | 0.79 ± 0.077 | 0.72 ± 0.073 | 0.8 ± 0.081  | 0.7 ± 0.08   |
|               | AE                | 0.81 ± 0.082 | 0.74 ± 0.087 | 0.8 ± 0.13   | 0.73 ± 0.099 |
|               | LDA               | 0.79 ± 0.089 | 0.74 ± 0.093 | 0.78 ± 0.11  | 0.73 ± 0.11  |
|               | LR                | 0.8 ± 0.084  | 0.75 ± 0.09  | 0.78 ± 0.1   | 0.75 ± 0.092 |
|               | LASSO             | 0.8 ± 0.082  | 0.75 ± 0.073 | 0.76 ± 0.17  | 0.76 ± 0.09  |
|               | NB                | 0.76 ± 0.069 | 0.74 ± 0.048 | 0.73 ± 0.092 | 0.74 ± 0.052 |

**Supplemental Table 11.** Classification performance indices of different feature selector and classifiers in Strategy 10.

| <b>FS</b>     | <b>Classifier</b> | <b>AUC</b>   | <b>Acc</b>   | <b>Sen</b>   | <b>Spe</b>   |
|---------------|-------------------|--------------|--------------|--------------|--------------|
| <b>ANOVA</b>  | RF                | 0.82 ± 0.095 | 0.78 ± 0.11  | 0.82 ± 0.097 | 0.77 ± 0.11  |
|               | AB                | 0.8 ± 0.13   | 0.77 ± 0.11  | 0.81 ± 0.11  | 0.76 ± 0.12  |
|               | AE                | 0.79 ± 0.11  | 0.74 ± 0.11  | 0.83 ± 0.11  | 0.73 ± 0.11  |
|               | LDA               | 0.82 ± 0.1   | 0.77 ± 0.094 | 0.83 ± 0.11  | 0.77 ± 0.093 |
|               | LR                | 0.82 ± 0.1   | 0.78 ± 0.093 | 0.84 ± 0.12  | 0.77 ± 0.094 |
|               | LASSO             | 0.81 ± 0.099 | 0.78 ± 0.085 | 0.82 ± 0.12  | 0.78 ± 0.085 |
|               | NB                | 0.79 ± 0.12  | 0.76 ± 0.12  | 0.83 ± 0.12  | 0.75 ± 0.13  |
| <b>KW</b>     | RF                | 0.82 ± 0.09  | 0.76 ± 0.11  | 0.83 ± 0.11  | 0.75 ± 0.12  |
|               | AB                | 0.8 ± 0.14   | 0.74 ± 0.15  | 0.84 ± 0.14  | 0.72 ± 0.16  |
|               | AE                | 0.79 ± 0.11  | 0.73 ± 0.14  | 0.83 ± 0.13  | 0.72 ± 0.16  |
|               | LDA               | 0.81 ± 0.1   | 0.75 ± 0.1   | 0.84 ± 0.14  | 0.74 ± 0.11  |
|               | LR                | 0.81 ± 0.097 | 0.75 ± 0.11  | 0.85 ± 0.11  | 0.75 ± 0.12  |
|               | LASSO             | 0.81 ± 0.095 | 0.76 ± 0.1   | 0.85 ± 0.11  | 0.75 ± 0.11  |
|               | NB                | 0.79 ± 0.11  | 0.75 ± 0.12  | 0.83 ± 0.15  | 0.74 ± 0.13  |
| <b>Relief</b> | RF                | 0.83 ± 0.1   | 0.75 ± 0.12  | 0.85 ± 0.11  | 0.74 ± 0.13  |
|               | AB                | 0.77 ± 0.14  | 0.71 ± 0.15  | 0.84 ± 0.13  | 0.69 ± 0.15  |
|               | AE                | 0.79 ± 0.11  | 0.74 ± 0.11  | 0.81 ± 0.13  | 0.72 ± 0.12  |
|               | LDA               | 0.81 ± 0.11  | 0.74 ± 0.1   | 0.86 ± 0.11  | 0.72 ± 0.11  |
|               | LR                | 0.81 ± 0.11  | 0.73 ± 0.13  | 0.86 ± 0.13  | 0.71 ± 0.14  |
|               | LASSO             | 0.8 ± 0.11   | 0.73 ± 0.12  | 0.87 ± 0.12  | 0.71 ± 0.13  |
|               | NB                | 0.79 ± 0.12  | 0.74 ± 0.13  | 0.83 ± 0.12  | 0.72 ± 0.14  |
| <b>RFE</b>    | RF                | 0.82 ± 0.099 | 0.72 ± 0.13  | 0.87 ± 0.092 | 0.7 ± 0.13   |
|               | AB                | 0.8 ± 0.14   | 0.76 ± 0.13  | 0.84 ± 0.1   | 0.74 ± 0.13  |
|               | AE                | 0.8 ± 0.1    | 0.74 ± 0.1   | 0.84 ± 0.13  | 0.72 ± 0.11  |
|               | LDA               | 0.81 ± 0.11  | 0.73 ± 0.11  | 0.87 ± 0.1   | 0.71 ± 0.12  |
|               | LR                | 0.8 ± 0.12   | 0.73 ± 0.14  | 0.85 ± 0.15  | 0.71 ± 0.15  |
|               | LASSO             | 0.79 ± 0.11  | 0.73 ± 0.13  | 0.83 ± 0.16  | 0.72 ± 0.14  |
|               | NB                | 0.79 ± 0.12  | 0.75 ± 0.13  | 0.83 ± 0.13  | 0.74 ± 0.14  |

**Supplemental Table 12.** Classification performance indices of different feature selector and classifiers in Strategy 8 [for each center.](#)

| Center    | FS     | Classifier | AUC         | 95% CIs     | Std    | Acc  | Sen  | Spe  |
|-----------|--------|------------|-------------|-------------|--------|------|------|------|
| Center_01 | ANOVA  | AB         | 0.6         | [0.59-0.62] | 0.0075 | 0.58 | 0.59 | 0.58 |
|           |        | AE         | 0.77        | [0.75-0.78] | 0.0061 | 0.68 | 0.73 | 0.67 |
|           |        | LASSO      | 0.59        | [0.57-0.6]  | 0.0073 | 0.58 | 0.59 | 0.58 |
|           |        | LDA        | 0.63        | [0.62-0.65] | 0.0067 | 0.61 | 0.66 | 0.6  |
|           |        | LR         | 0.58        | [0.57-0.6]  | 0.0072 | 0.57 | 0.61 | 0.56 |
|           |        | NB         | 0.67        | [0.66-0.68] | 0.007  | 0.66 | 0.66 | 0.66 |
|           |        | RF         | 0.59        | [0.58-0.61] | 0.0075 | 0.52 | 0.66 | 0.5  |
|           | KW     | AB         | 0.59        | [0.57-0.6]  | 0.0076 | 0.55 | 0.64 | 0.54 |
|           |        | AE         | 0.65        | [0.64-0.66] | 0.007  | 0.63 | 0.65 | 0.63 |
|           |        | LASSO      | 0.61        | [0.6-0.63]  | 0.0076 | 0.58 | 0.64 | 0.57 |
|           |        | LDA        | 0.62        | [0.61-0.64] | 0.0069 | 0.62 | 0.64 | 0.62 |
|           |        | LR         | 0.6         | [0.59-0.62] | 0.0076 | 0.57 | 0.65 | 0.56 |
|           |        | NB         | 0.66        | [0.65-0.67] | 0.0068 | 0.63 | 0.66 | 0.63 |
|           |        | RF         | 0.59        | [0.58-0.61] | 0.0077 | 0.55 | 0.62 | 0.54 |
|           | Relief | AB         | 0.59        | [0.57-0.6]  | 0.0071 | 0.36 | 0.85 | 0.3  |
|           |        | AE         | 0.68        | [0.66-0.69] | 0.0067 | 0.63 | 0.65 | 0.63 |
|           |        | LASSO      | 0.64        | [0.62-0.65] | 0.0072 | 0.53 | 0.73 | 0.51 |
|           |        | LDA        | 0.6         | [0.58-0.61] | 0.0073 | 0.54 | 0.67 | 0.53 |
|           |        | LR         | 0.64        | [0.63-0.66] | 0.007  | 0.55 | 0.71 | 0.54 |
|           |        | NB         | 0.52        | [0.51-0.54] | 0.0076 | 0.53 | 0.54 | 0.53 |
|           |        | RF         | 0.59        | [0.57-0.6]  | 0.0077 | 0.53 | 0.64 | 0.51 |
| RFE       | AB     | 0.65       | [0.64-0.67] | 0.007       | 0.58   | 0.65 | 0.57 |      |
|           | AE     | 0.74       | [0.73-0.75] | 0.0068      | 0.65   | 0.73 | 0.64 |      |
|           | LASSO  | 0.55       | [0.53-0.56] | 0.0074      | 0.54   | 0.57 | 0.53 |      |
|           | LDA    | 0.58       | [0.56-0.59] | 0.0072      | 0.54   | 0.65 | 0.52 |      |
|           | LR     | 0.57       | [0.55-0.58] | 0.0073      | 0.57   | 0.57 | 0.57 |      |
|           | NB     | 0.59       | [0.58-0.61] | 0.0069      | 0.49   | 0.71 | 0.46 |      |
|           | RF     | 0.57       | [0.55-0.58] | 0.0078      | 0.52   | 0.59 | 0.51 |      |
| Center_02 | ANOVA  | AB         | 0.74        | [0.73-0.75] | 0.0062 | 0.67 | 0.71 | 0.67 |
|           |        | AE         | 0.8         | [0.78-0.81] | 0.0061 | 0.74 | 0.74 | 0.74 |
|           |        | LASSO      | 0.77        | [0.75-0.78] | 0.0065 | 0.7  | 0.72 | 0.7  |
|           |        | LDA        | 0.79        | [0.77-0.8]  | 0.0062 | 0.73 | 0.71 | 0.73 |
|           |        | LR         | 0.76        | [0.75-0.77] | 0.0062 | 0.68 | 0.72 | 0.67 |
|           |        | NB         | 0.79        | [0.78-0.8]  | 0.0061 | 0.72 | 0.75 | 0.71 |
|           |        | RF         | 0.77        | [0.75-0.78] | 0.0065 | 0.71 | 0.72 | 0.71 |
|           | KW     | AB         | 0.75        | [0.73-0.76] | 0.0063 | 0.68 | 0.71 | 0.67 |



|           |        |       |      |             |        |      |      |      |
|-----------|--------|-------|------|-------------|--------|------|------|------|
|           |        | AE    | 0.79 | [0.78-0.8]  | 0.0061 | 0.72 | 0.75 | 0.72 |
|           |        | LASSO | 0.78 | [0.77-0.79] | 0.0065 | 0.73 | 0.74 | 0.73 |
|           |        | LDA   | 0.75 | [0.74-0.77] | 0.007  | 0.69 | 0.71 | 0.69 |
|           |        | LR    | 0.74 | [0.73-0.76] | 0.0067 | 0.68 | 0.69 | 0.68 |
|           |        | NB    | 0.79 | [0.78-0.8]  | 0.0061 | 0.72 | 0.75 | 0.72 |
|           |        | RF    | 0.77 | [0.75-0.78] | 0.0066 | 0.7  | 0.75 | 0.7  |
|           |        | AB    | 0.68 | [0.66-0.69] | 0.0078 | 0.59 | 0.69 | 0.58 |
|           |        | AE    | 0.75 | [0.73-0.76] | 0.0067 | 0.7  | 0.7  | 0.7  |
|           | Relief | LASSO | 0.76 | [0.75-0.78] | 0.0065 | 0.69 | 0.73 | 0.69 |
|           |        | LDA   | 0.71 | [0.69-0.72] | 0.0074 | 0.63 | 0.67 | 0.62 |
|           |        | LR    | 0.77 | [0.76-0.78] | 0.0063 | 0.69 | 0.72 | 0.69 |
|           |        | NB    | 0.6  | [0.58-0.62] | 0.0082 | 0.71 | 0.48 | 0.74 |
|           |        | RF    | 0.76 | [0.75-0.77] | 0.0068 | 0.69 | 0.75 | 0.69 |
|           |        | AB    | 0.71 | [0.7-0.73]  | 0.0066 | 0.6  | 0.74 | 0.58 |
|           |        | AE    | 0.8  | [0.79-0.81] | 0.006  | 0.73 | 0.74 | 0.73 |
|           | RFE    | LASSO | 0.7  | [0.68-0.71] | 0.0071 | 0.64 | 0.66 | 0.64 |
|           |        | LDA   | 0.76 | [0.75-0.77] | 0.0063 | 0.65 | 0.76 | 0.63 |
|           |        | LR    | 0.75 | [0.74-0.77] | 0.0063 | 0.65 | 0.74 | 0.64 |
|           |        | NB    | 0.73 | [0.72-0.74] | 0.0064 | 0.69 | 0.7  | 0.69 |
|           |        | RF    | 0.76 | [0.75-0.78] | 0.0066 | 0.71 | 0.73 | 0.71 |
|           |        | AB    | 0.71 | [0.7-0.72]  | 0.0072 | 0.64 | 0.7  | 0.63 |
|           |        | AE    | 0.55 | [0.53-0.56] | 0.0076 | 0.57 | 0.55 | 0.57 |
|           | ANOVA  | LASSO | 0.71 | [0.69-0.72] | 0.0069 | 0.67 | 0.7  | 0.66 |
|           |        | LDA   | 0.66 | [0.65-0.67] | 0.0069 | 0.58 | 0.71 | 0.57 |
|           |        | LR    | 0.72 | [0.71-0.73] | 0.0064 | 0.64 | 0.7  | 0.63 |
|           |        | NB    | 0.76 | [0.75-0.77] | 0.0068 | 0.74 | 0.7  | 0.74 |
|           |        | RF    | 0.73 | [0.71-0.74] | 0.0071 | 0.68 | 0.68 | 0.68 |
|           |        | AB    | 0.71 | [0.69-0.72] | 0.007  | 0.64 | 0.73 | 0.62 |
|           |        | AE    | 0.6  | [0.59-0.62] | 0.0069 | 0.55 | 0.65 | 0.54 |
|           | KW     | LASSO | 0.71 | [0.69-0.72] | 0.0067 | 0.64 | 0.66 | 0.64 |
| Center_03 |        | LDA   | 0.76 | [0.75-0.77] | 0.007  | 0.8  | 0.59 | 0.83 |
|           |        | LR    | 0.74 | [0.72-0.75] | 0.0066 | 0.68 | 0.69 | 0.68 |
|           |        | NB    | 0.76 | [0.74-0.77] | 0.0068 | 0.73 | 0.7  | 0.74 |
|           |        | RF    | 0.73 | [0.72-0.75] | 0.0069 | 0.74 | 0.63 | 0.76 |
|           |        | AB    | 0.76 | [0.74-0.77] | 0.0072 | 0.7  | 0.75 | 0.7  |
|           |        | AE    | 0.64 | [0.63-0.65] | 0.0077 | 0.53 | 0.69 | 0.52 |
|           | Relief | LASSO | 0.71 | [0.7-0.72]  | 0.0065 | 0.57 | 0.75 | 0.55 |
|           |        | LDA   | 0.76 | [0.75-0.78] | 0.0067 | 0.74 | 0.68 | 0.75 |
|           |        | LR    | 0.77 | [0.76-0.78] | 0.0067 | 0.72 | 0.72 | 0.72 |
|           |        | NB    | 0.77 | [0.75-0.78] | 0.0067 | 0.73 | 0.69 | 0.74 |
|           |        | RF    | 0.72 | [0.71-0.74] | 0.0071 | 0.65 | 0.7  | 0.64 |

|                  |        |       |      |             |        |      |      |      |
|------------------|--------|-------|------|-------------|--------|------|------|------|
|                  |        | AB    | 0.75 | [0.74-0.77] | 0.0072 | 0.67 | 0.74 | 0.66 |
|                  |        | AE    | 0.62 | [0.61-0.64] | 0.0077 | 0.45 | 0.75 | 0.41 |
|                  | RFE    | LASSO | 0.69 | [0.68-0.71] | 0.007  | 0.59 | 0.7  | 0.58 |
|                  |        | LDA   | 0.67 | [0.66-0.69] | 0.0067 | 0.62 | 0.67 | 0.61 |
|                  |        | LR    | 0.72 | [0.7-0.73]  | 0.0065 | 0.64 | 0.7  | 0.63 |
|                  |        | NB    | 0.74 | [0.73-0.75] | 0.0061 | 0.63 | 0.78 | 0.61 |
|                  |        | RF    | 0.72 | [0.71-0.73] | 0.007  | 0.68 | 0.68 | 0.67 |
|                  |        | AB    | 0.76 | [0.75-0.77] | 0.0066 | 0.67 | 0.74 | 0.66 |
|                  |        | AE    | 0.79 | [0.78-0.8]  | 0.0062 | 0.71 | 0.74 | 0.71 |
|                  | ANOVA  | LASSO | 0.78 | [0.77-0.8]  | 0.0062 | 0.65 | 0.78 | 0.64 |
|                  |        | LDA   | 0.77 | [0.75-0.78] | 0.0064 | 0.69 | 0.71 | 0.69 |
|                  |        | LR    | 0.79 | [0.77-0.8]  | 0.0062 | 0.66 | 0.79 | 0.65 |
|                  |        | NB    | 0.79 | [0.78-0.8]  | 0.0063 | 0.72 | 0.74 | 0.72 |
|                  |        | RF    | 0.76 | [0.74-0.77] | 0.0065 | 0.69 | 0.68 | 0.69 |
|                  |        | AB    | 0.76 | [0.74-0.77] | 0.0065 | 0.68 | 0.72 | 0.68 |
|                  |        | AE    | 0.78 | [0.77-0.8]  | 0.0062 | 0.7  | 0.76 | 0.69 |
|                  | KW     | LASSO | 0.78 | [0.77-0.8]  | 0.0061 | 0.64 | 0.8  | 0.62 |
|                  |        | LDA   | 0.75 | [0.74-0.77] | 0.0066 | 0.67 | 0.71 | 0.66 |
|                  |        | LR    | 0.78 | [0.77-0.8]  | 0.0061 | 0.66 | 0.78 | 0.64 |
|                  |        | NB    | 0.79 | [0.78-0.8]  | 0.0062 | 0.72 | 0.74 | 0.72 |
|                  |        | RF    | 0.76 | [0.75-0.77] | 0.0065 | 0.7  | 0.7  | 0.7  |
| <b>Center_04</b> |        | AB    | 0.76 | [0.75-0.77] | 0.0065 | 0.64 | 0.78 | 0.63 |
|                  |        | AE    | 0.78 | [0.76-0.79] | 0.0065 | 0.7  | 0.73 | 0.7  |
|                  | Relief | LASSO | 0.78 | [0.77-0.79] | 0.0062 | 0.67 | 0.75 | 0.66 |
|                  |        | LDA   | 0.73 | [0.72-0.74] | 0.0065 | 0.63 | 0.71 | 0.62 |
|                  |        | LR    | 0.78 | [0.77-0.79] | 0.0062 | 0.64 | 0.79 | 0.62 |
|                  |        | NB    | 0.75 | [0.74-0.77] | 0.0065 | 0.68 | 0.71 | 0.67 |
|                  |        | RF    | 0.76 | [0.74-0.77] | 0.0066 | 0.66 | 0.74 | 0.66 |
|                  |        | AB    | 0.7  | [0.69-0.72] | 0.0069 | 0.57 | 0.79 | 0.54 |
|                  |        | AE    | 0.77 | [0.75-0.78] | 0.0063 | 0.66 | 0.77 | 0.64 |
|                  | RFE    | LASSO | 0.77 | [0.76-0.78] | 0.0061 | 0.69 | 0.71 | 0.69 |
|                  |        | LDA   | 0.77 | [0.76-0.78] | 0.0064 | 0.69 | 0.72 | 0.69 |
|                  |        | LR    | 0.77 | [0.75-0.78] | 0.0062 | 0.67 | 0.73 | 0.66 |
|                  |        | NB    | 0.78 | [0.77-0.8]  | 0.0062 | 0.7  | 0.74 | 0.7  |
|                  |        | RF    | 0.75 | [0.74-0.77] | 0.0067 | 0.7  | 0.71 | 0.7  |
|                  |        | AB    | 0.74 | [0.72-0.75] | 0.0068 | 0.69 | 0.73 | 0.69 |
|                  |        | AE    | 0.74 | [0.73-0.75] | 0.0065 | 0.69 | 0.73 | 0.68 |
| <b>Center_05</b> | ANOVA  | LASSO | 0.77 | [0.76-0.79] | 0.0065 | 0.68 | 0.75 | 0.67 |
|                  |        | LDA   | 0.75 | [0.74-0.77] | 0.0065 | 0.7  | 0.68 | 0.71 |
|                  |        | LR    | 0.77 | [0.76-0.78] | 0.0064 | 0.66 | 0.75 | 0.65 |
|                  |        | NB    | 0.75 | [0.73-0.76] | 0.0068 | 0.7  | 0.69 | 0.7  |

|  |        |       |      |             |        |      |      |      |
|--|--------|-------|------|-------------|--------|------|------|------|
|  |        | RF    | 0.73 | [0.72-0.75] | 0.0069 | 0.63 | 0.73 | 0.62 |
|  |        | AB    | 0.7  | [0.69-0.71] | 0.007  | 0.65 | 0.65 | 0.65 |
|  |        | AE    | 0.74 | [0.72-0.75] | 0.0069 | 0.69 | 0.7  | 0.68 |
|  |        | LASSO | 0.76 | [0.75-0.78] | 0.0065 | 0.68 | 0.71 | 0.68 |
|  | KW     | LDA   | 0.71 | [0.7-0.73]  | 0.007  | 0.66 | 0.68 | 0.65 |
|  |        | LR    | 0.76 | [0.75-0.78] | 0.0065 | 0.7  | 0.7  | 0.7  |
|  |        | NB    | 0.76 | [0.75-0.78] | 0.0066 | 0.74 | 0.66 | 0.75 |
|  |        | RF    | 0.73 | [0.72-0.75] | 0.0069 | 0.63 | 0.73 | 0.62 |
|  |        | AB    | 0.72 | [0.7-0.73]  | 0.0066 | 0.59 | 0.83 | 0.56 |
|  |        | AE    | 0.72 | [0.71-0.74] | 0.0068 | 0.66 | 0.7  | 0.65 |
|  |        | LASSO | 0.72 | [0.71-0.73] | 0.0067 | 0.65 | 0.68 | 0.65 |
|  | Relief | LDA   | 0.57 | [0.56-0.59] | 0.0082 | 0.57 | 0.57 | 0.57 |
|  |        | LR    | 0.72 | [0.7-0.73]  | 0.0072 | 0.62 | 0.72 | 0.61 |
|  |        | NB    | 0.57 | [0.55-0.59] | 0.0086 | 0.8  | 0.3  | 0.86 |
|  |        | RF    | 0.75 | [0.74-0.77] | 0.0067 | 0.7  | 0.71 | 0.69 |
|  |        | AB    | 0.7  | [0.69-0.72] | 0.0067 | 0.57 | 0.81 | 0.54 |
|  |        | AE    | 0.75 | [0.74-0.76] | 0.0066 | 0.64 | 0.75 | 0.63 |
|  |        | LASSO | 0.72 | [0.71-0.73] | 0.0068 | 0.64 | 0.69 | 0.63 |
|  | RFE    | LDA   | 0.69 | [0.67-0.7]  | 0.0072 | 0.6  | 0.69 | 0.59 |
|  |        | LR    | 0.69 | [0.67-0.7]  | 0.0074 | 0.64 | 0.65 | 0.63 |
|  |        | NB    | 0.61 | [0.59-0.62] | 0.0086 | 0.72 | 0.46 | 0.76 |
|  |        | RF    | 0.73 | [0.72-0.75] | 0.0066 | 0.62 | 0.75 | 0.6  |
|  |        | AB    | 0.67 | [0.66-0.69] | 0.0076 | 0.64 | 0.64 | 0.64 |
|  |        | AE    | 0.76 | [0.75-0.77] | 0.0064 | 0.68 | 0.71 | 0.68 |
|  |        | LASSO | 0.7  | [0.69-0.72] | 0.0074 | 0.65 | 0.65 | 0.65 |
|  | ANOVA  | LDA   | 0.6  | [0.58-0.61] | 0.0078 | 0.58 | 0.56 | 0.58 |
|  |        | LR    | 0.74 | [0.73-0.76] | 0.0067 | 0.64 | 0.71 | 0.64 |
|  |        | NB    | 0.76 | [0.75-0.77] | 0.0064 | 0.67 | 0.73 | 0.66 |
|  |        | RF    | 0.58 | [0.56-0.59] | 0.0071 | 0.47 | 0.73 | 0.44 |
|  |        | AB    | 0.7  | [0.68-0.71] | 0.0072 | 0.6  | 0.77 | 0.58 |
|  |        | AE    | 0.75 | [0.74-0.77] | 0.0066 | 0.69 | 0.7  | 0.69 |
|  |        | LASSO | 0.69 | [0.67-0.7]  | 0.0078 | 0.64 | 0.65 | 0.64 |
|  | KW     | LDA   | 0.56 | [0.54-0.57] | 0.0083 | 0.54 | 0.56 | 0.54 |
|  |        | LR    | 0.7  | [0.69-0.71] | 0.0074 | 0.63 | 0.67 | 0.62 |
|  |        | NB    | 0.75 | [0.74-0.77] | 0.0066 | 0.68 | 0.71 | 0.67 |
|  |        | RF    | 0.57 | [0.55-0.59] | 0.0079 | 0.53 | 0.58 | 0.52 |
|  |        | AB    | 0.68 | [0.67-0.69] | 0.0068 | 0.58 | 0.8  | 0.56 |
|  |        | AE    | 0.75 | [0.74-0.76] | 0.0068 | 0.67 | 0.71 | 0.66 |
|  |        | LASSO | 0.72 | [0.71-0.74] | 0.0071 | 0.65 | 0.7  | 0.64 |
|  | Relief | LDA   | 0.74 | [0.73-0.76] | 0.007  | 0.69 | 0.69 | 0.69 |
|  |        | LR    | 0.75 | [0.74-0.77] | 0.0066 | 0.67 | 0.71 | 0.66 |

**Center\_06**

|                  |        |       |      |             |        |      |      |      |
|------------------|--------|-------|------|-------------|--------|------|------|------|
|                  |        | NB    | 0.72 | [0.7-0.73]  | 0.0075 | 0.65 | 0.67 | 0.65 |
|                  |        | RF    | 0.58 | [0.56-0.59] | 0.0076 | 0.54 | 0.61 | 0.53 |
|                  |        | AB    | 0.65 | [0.64-0.66] | 0.0071 | 0.62 | 0.66 | 0.61 |
|                  |        | AE    | 0.78 | [0.77-0.79] | 0.0062 | 0.72 | 0.72 | 0.72 |
|                  |        | LASSO | 0.72 | [0.7-0.73]  | 0.0068 | 0.57 | 0.75 | 0.55 |
|                  | RFE    | LDA   | 0.69 | [0.67-0.7]  | 0.0076 | 0.62 | 0.67 | 0.61 |
|                  |        | LR    | 0.72 | [0.7-0.73]  | 0.0068 | 0.53 | 0.79 | 0.5  |
|                  |        | NB    | 0.73 | [0.72-0.75] | 0.0069 | 0.62 | 0.73 | 0.61 |
|                  |        | RF    | 0.58 | [0.56-0.59] | 0.0071 | 0.47 | 0.73 | 0.44 |
|                  |        | AB    | 0.75 | [0.73-0.76] | 0.0063 | 0.74 | 0.59 | 0.76 |
|                  |        | AE    | 0.74 | [0.73-0.75] | 0.0068 | 0.66 | 0.73 | 0.66 |
|                  |        | LASSO | 0.78 | [0.77-0.8]  | 0.0064 | 0.75 | 0.69 | 0.75 |
|                  | ANOVA  | LDA   | 0.76 | [0.75-0.77] | 0.0062 | 0.7  | 0.71 | 0.7  |
|                  |        | LR    | 0.78 | [0.77-0.79] | 0.0063 | 0.7  | 0.74 | 0.7  |
|                  |        | NB    | 0.78 | [0.77-0.79] | 0.0064 | 0.72 | 0.73 | 0.72 |
|                  |        | RF    | 0.72 | [0.7-0.73]  | 0.0079 | 0.71 | 0.64 | 0.71 |
|                  |        | AB    | 0.77 | [0.76-0.78] | 0.0063 | 0.69 | 0.73 | 0.68 |
|                  |        | AE    | 0.71 | [0.7-0.73]  | 0.0068 | 0.61 | 0.75 | 0.6  |
|                  |        | LASSO | 0.78 | [0.77-0.8]  | 0.0062 | 0.71 | 0.72 | 0.7  |
|                  | KW     | LDA   | 0.71 | [0.69-0.72] | 0.0071 | 0.65 | 0.66 | 0.65 |
|                  |        | LR    | 0.76 | [0.75-0.77] | 0.0067 | 0.7  | 0.72 | 0.69 |
|                  |        | NB    | 0.77 | [0.76-0.78] | 0.0065 | 0.72 | 0.72 | 0.72 |
|                  |        | RF    | 0.76 | [0.75-0.77] | 0.0068 | 0.69 | 0.7  | 0.69 |
| <b>Center_07</b> |        | AB    | 0.73 | [0.72-0.74] | 0.0065 | 0.66 | 0.66 | 0.66 |
|                  |        | AE    | 0.71 | [0.7-0.73]  | 0.0067 | 0.6  | 0.72 | 0.59 |
|                  |        | LASSO | 0.74 | [0.73-0.76] | 0.0065 | 0.66 | 0.71 | 0.66 |
|                  | Relief | LDA   | 0.72 | [0.71-0.73] | 0.0067 | 0.66 | 0.68 | 0.66 |
|                  |        | LR    | 0.75 | [0.73-0.76] | 0.0067 | 0.66 | 0.72 | 0.66 |
|                  |        | NB    | 0.75 | [0.74-0.76] | 0.0062 | 0.7  | 0.71 | 0.7  |
|                  |        | RF    | 0.68 | [0.67-0.7]  | 0.0075 | 0.65 | 0.66 | 0.65 |
|                  |        | AB    | 0.75 | [0.74-0.77] | 0.0063 | 0.67 | 0.73 | 0.66 |
|                  |        | AE    | 0.62 | [0.61-0.63] | 0.0067 | 0.57 | 0.67 | 0.56 |
|                  |        | LASSO | 0.76 | [0.74-0.77] | 0.0064 | 0.68 | 0.72 | 0.68 |
|                  | RFE    | LDA   | 0.75 | [0.73-0.76] | 0.0065 | 0.65 | 0.76 | 0.63 |
|                  |        | LR    | 0.77 | [0.76-0.78] | 0.0063 | 0.69 | 0.75 | 0.68 |
|                  |        | NB    | 0.71 | [0.69-0.72] | 0.0064 | 0.64 | 0.72 | 0.63 |
|                  |        | RF    | 0.69 | [0.68-0.71] | 0.0075 | 0.59 | 0.71 | 0.58 |
|                  |        | AB    | 0.67 | [0.65-0.68] | 0.0077 | 0.61 | 0.66 | 0.61 |
| <b>Center_08</b> | ANOVA  | AB    | 0.67 | [0.65-0.68] | 0.0077 | 0.61 | 0.66 | 0.61 |
|                  |        | AE    | 0.75 | [0.74-0.76] | 0.0061 | 0.7  | 0.7  | 0.7  |
|                  |        | AE    | 0.75 | [0.74-0.76] | 0.0061 | 0.7  | 0.7  | 0.7  |

|        |       |      |             |        |      |      |      |
|--------|-------|------|-------------|--------|------|------|------|
|        | LASSO | 0.76 | [0.75-0.77] | 0.0061 | 0.68 | 0.73 | 0.67 |
|        | LASSO | 0.76 | [0.75-0.77] | 0.0061 | 0.68 | 0.73 | 0.67 |
|        | LDA   | 0.73 | [0.71-0.74] | 0.0064 | 0.65 | 0.7  | 0.64 |
|        | LDA   | 0.73 | [0.71-0.74] | 0.0064 | 0.65 | 0.7  | 0.64 |
|        | LR    | 0.75 | [0.74-0.77] | 0.0062 | 0.69 | 0.7  | 0.69 |
|        | LR    | 0.75 | [0.74-0.77] | 0.0062 | 0.69 | 0.7  | 0.69 |
| KW     | NB    | 0.78 | [0.77-0.79] | 0.006  | 0.72 | 0.74 | 0.72 |
|        | NB    | 0.78 | [0.77-0.79] | 0.006  | 0.72 | 0.74 | 0.72 |
|        | RF    | 0.66 | [0.65-0.68] | 0.0075 | 0.61 | 0.64 | 0.6  |
|        | RF    | 0.66 | [0.65-0.68] | 0.0075 | 0.61 | 0.64 | 0.6  |
|        | AB    | 0.63 | [0.62-0.65] | 0.0075 | 0.52 | 0.71 | 0.5  |
|        | AE    | 0.7  | [0.69-0.72] | 0.007  | 0.6  | 0.7  | 0.59 |
|        | LASSO | 0.6  | [0.59-0.62] | 0.0074 | 0.54 | 0.66 | 0.53 |
| Relief | LDA   | 0.61 | [0.6-0.63]  | 0.0078 | 0.58 | 0.59 | 0.57 |
|        | LR    | 0.62 | [0.61-0.64] | 0.0074 | 0.54 | 0.69 | 0.53 |
|        | NB    | 0.65 | [0.63-0.66] | 0.0075 | 0.63 | 0.63 | 0.63 |
|        | RF    | 0.64 | [0.63-0.66] | 0.0075 | 0.58 | 0.64 | 0.57 |
|        | AB    | 0.69 | [0.68-0.71] | 0.0072 | 0.63 | 0.69 | 0.62 |
|        | AE    | 0.76 | [0.75-0.77] | 0.0064 | 0.66 | 0.74 | 0.65 |
|        | LASSO | 0.63 | [0.61-0.64] | 0.0083 | 0.58 | 0.64 | 0.57 |
| RFE    | LDA   | 0.61 | [0.59-0.62] | 0.0075 | 0.57 | 0.63 | 0.57 |
|        | LR    | 0.64 | [0.62-0.65] | 0.0079 | 0.59 | 0.63 | 0.58 |
|        | NB    | 0.71 | [0.7-0.73]  | 0.0062 | 0.64 | 0.73 | 0.63 |
|        | RF    | 0.65 | [0.64-0.67] | 0.0076 | 0.61 | 0.62 | 0.61 |
|        | AB    | 0.57 | [0.56-0.58] | 0.0067 | 0.58 | 0.59 | 0.58 |
|        | AE    | 0.55 | [0.54-0.57] | 0.008  | 0.57 | 0.58 | 0.57 |
|        | LASSO | 0.76 | [0.74-0.77] | 0.0067 | 0.7  | 0.73 | 0.69 |
| ANOVA  | LDA   | 0.69 | [0.67-0.7]  | 0.0073 | 0.65 | 0.66 | 0.65 |
|        | LR    | 0.76 | [0.75-0.77] | 0.0067 | 0.7  | 0.73 | 0.69 |
|        | NB    | 0.77 | [0.76-0.78] | 0.0062 | 0.73 | 0.7  | 0.73 |
|        | RF    | 0.64 | [0.62-0.65] | 0.0071 | 0.54 | 0.66 | 0.53 |
|        | AB    | 0.53 | [0.52-0.55] | 0.0077 | 0.51 | 0.56 | 0.5  |
|        | AE    | 0.61 | [0.59-0.62] | 0.0075 | 0.52 | 0.66 | 0.51 |
|        | LASSO | 0.71 | [0.7-0.73]  | 0.0069 | 0.65 | 0.71 | 0.64 |
| KW     | LDA   | 0.56 | [0.54-0.57] | 0.0078 | 0.52 | 0.59 | 0.51 |
|        | LR    | 0.71 | [0.69-0.72] | 0.0071 | 0.65 | 0.68 | 0.64 |
|        | NB    | 0.75 | [0.73-0.76] | 0.0067 | 0.7  | 0.72 | 0.69 |
|        | RF    | 0.67 | [0.66-0.68] | 0.0071 | 0.54 | 0.73 | 0.51 |
|        | AB    | 0.68 | [0.67-0.69] | 0.0066 | 0.58 | 0.71 | 0.56 |
| Relief | AE    | 0.56 | [0.54-0.57] | 0.0064 | 0.44 | 0.78 | 0.4  |
|        | LASSO | 0.72 | [0.71-0.73] | 0.0066 | 0.65 | 0.71 | 0.64 |

Center\_09

|                  |        |       |      |             |        |      |      |      |
|------------------|--------|-------|------|-------------|--------|------|------|------|
|                  |        | LDA   | 0.72 | [0.71-0.73] | 0.0068 | 0.64 | 0.68 | 0.63 |
|                  |        | LR    | 0.73 | [0.72-0.74] | 0.0066 | 0.66 | 0.71 | 0.65 |
|                  |        | NB    | 0.73 | [0.72-0.74] | 0.0065 | 0.67 | 0.68 | 0.67 |
|                  |        | RF    | 0.67 | [0.66-0.68] | 0.0068 | 0.62 | 0.64 | 0.61 |
|                  |        | AB    | 0.61 | [0.59-0.62] | 0.0071 | 0.42 | 0.83 | 0.37 |
|                  |        | AE    | 0.64 | [0.62-0.65] | 0.0073 | 0.53 | 0.7  | 0.51 |
|                  |        | LASSO | 0.72 | [0.7-0.73]  | 0.0066 | 0.66 | 0.66 | 0.66 |
|                  | RFE    | LDA   | 0.67 | [0.66-0.69] | 0.0068 | 0.61 | 0.66 | 0.61 |
|                  |        | LR    | 0.71 | [0.7-0.72]  | 0.0067 | 0.66 | 0.66 | 0.66 |
|                  |        | NB    | 0.7  | [0.68-0.71] | 0.0063 | 0.66 | 0.68 | 0.66 |
|                  |        | RF    | 0.68 | [0.66-0.69] | 0.0075 | 0.64 | 0.65 | 0.64 |
|                  |        | AB    | 0.7  | [0.68-0.71] | 0.0073 | 0.61 | 0.67 | 0.6  |
|                  |        | AE    | 0.75 | [0.73-0.76] | 0.0069 | 0.69 | 0.69 | 0.69 |
|                  |        | LASSO | 0.77 | [0.76-0.79] | 0.0062 | 0.72 | 0.7  | 0.73 |
|                  | ANOVA  | LDA   | 0.78 | [0.77-0.8]  | 0.0062 | 0.74 | 0.7  | 0.75 |
|                  |        | LR    | 0.75 | [0.74-0.77] | 0.0063 | 0.7  | 0.71 | 0.7  |
|                  |        | NB    | 0.75 | [0.74-0.76] | 0.0065 | 0.68 | 0.74 | 0.67 |
|                  |        | RF    | 0.67 | [0.65-0.68] | 0.0074 | 0.61 | 0.66 | 0.61 |
|                  |        | AB    | 0.76 | [0.75-0.78] | 0.0062 | 0.64 | 0.77 | 0.62 |
|                  |        | AE    | 0.75 | [0.74-0.76] | 0.0066 | 0.64 | 0.75 | 0.63 |
|                  |        | LASSO | 0.78 | [0.77-0.8]  | 0.0063 | 0.7  | 0.74 | 0.7  |
|                  | KW     | LDA   | 0.75 | [0.74-0.77] | 0.0066 | 0.69 | 0.69 | 0.69 |
|                  |        | LR    | 0.76 | [0.75-0.78] | 0.0067 | 0.69 | 0.71 | 0.69 |
|                  |        | NB    | 0.75 | [0.74-0.77] | 0.0064 | 0.7  | 0.72 | 0.7  |
|                  |        | RF    | 0.7  | [0.68-0.71] | 0.0077 | 0.61 | 0.68 | 0.6  |
| <b>Center_10</b> |        | AB    | 0.61 | [0.59-0.62] | 0.0078 | 0.58 | 0.58 | 0.58 |
|                  |        | AE    | 0.72 | [0.7-0.73]  | 0.0071 | 0.66 | 0.69 | 0.65 |
|                  |        | LASSO | 0.72 | [0.71-0.74] | 0.007  | 0.67 | 0.71 | 0.67 |
|                  | Relief | LDA   | 0.7  | [0.69-0.71] | 0.0067 | 0.64 | 0.72 | 0.62 |
|                  |        | LR    | 0.73 | [0.71-0.74] | 0.0071 | 0.69 | 0.69 | 0.69 |
|                  |        | NB    | 0.69 | [0.68-0.7]  | 0.0066 | 0.62 | 0.74 | 0.61 |
|                  |        | RF    | 0.66 | [0.64-0.67] | 0.0073 | 0.6  | 0.65 | 0.59 |
|                  |        | AB    | 0.68 | [0.67-0.7]  | 0.0082 | 0.6  | 0.68 | 0.59 |
|                  |        | AE    | 0.73 | [0.71-0.74] | 0.0071 | 0.64 | 0.71 | 0.63 |
|                  |        | LASSO | 0.7  | [0.68-0.71] | 0.0074 | 0.65 | 0.67 | 0.65 |
|                  | RFE    | LDA   | 0.68 | [0.67-0.69] | 0.0068 | 0.61 | 0.72 | 0.6  |
|                  |        | LR    | 0.72 | [0.7-0.73]  | 0.0071 | 0.67 | 0.69 | 0.67 |
|                  |        | NB    | 0.69 | [0.68-0.71] | 0.0069 | 0.65 | 0.7  | 0.64 |
|                  |        | RF    | 0.67 | [0.66-0.69] | 0.0074 | 0.6  | 0.67 | 0.59 |
| <b>Center_11</b> | ANOVA  | AB    | 0.64 | [0.63-0.66] | 0.0068 | 0.54 | 0.76 | 0.52 |
|                  |        | AE    | 0.76 | [0.75-0.78] | 0.0067 | 0.7  | 0.71 | 0.7  |

|        |       |      |             |        |      |      |      |
|--------|-------|------|-------------|--------|------|------|------|
|        | LASSO | 0.73 | [0.71-0.74] | 0.0067 | 0.67 | 0.69 | 0.67 |
|        | LDA   | 0.67 | [0.65-0.68] | 0.0074 | 0.61 | 0.67 | 0.6  |
|        | LR    | 0.71 | [0.7-0.72]  | 0.0067 | 0.66 | 0.69 | 0.66 |
|        | NB    | 0.74 | [0.73-0.75] | 0.0066 | 0.68 | 0.73 | 0.67 |
|        | RF    | 0.7  | [0.68-0.71] | 0.0069 | 0.62 | 0.71 | 0.61 |
|        | AB    | 0.61 | [0.6-0.63]  | 0.0075 | 0.53 | 0.72 | 0.51 |
|        | AE    | 0.77 | [0.76-0.78] | 0.0065 | 0.69 | 0.74 | 0.69 |
| KW     | LASSO | 0.75 | [0.74-0.76] | 0.0068 | 0.7  | 0.7  | 0.69 |
|        | LDA   | 0.72 | [0.7-0.73]  | 0.007  | 0.64 | 0.7  | 0.64 |
|        | LR    | 0.74 | [0.72-0.75] | 0.0069 | 0.68 | 0.7  | 0.67 |
|        | NB    | 0.74 | [0.72-0.75] | 0.0067 | 0.7  | 0.7  | 0.7  |
|        | RF    | 0.72 | [0.71-0.74] | 0.0067 | 0.62 | 0.74 | 0.61 |
|        | AB    | 0.66 | [0.65-0.68] | 0.0077 | 0.55 | 0.7  | 0.53 |
|        | AE    | 0.69 | [0.68-0.71] | 0.0069 | 0.59 | 0.73 | 0.57 |
| Relief | LASSO | 0.77 | [0.76-0.78] | 0.0062 | 0.64 | 0.79 | 0.62 |
|        | LDA   | 0.76 | [0.74-0.77] | 0.0065 | 0.66 | 0.75 | 0.65 |
|        | LR    | 0.77 | [0.76-0.78] | 0.0066 | 0.69 | 0.73 | 0.69 |
|        | NB    | 0.7  | [0.69-0.71] | 0.0064 | 0.62 | 0.73 | 0.61 |
|        | RF    | 0.7  | [0.68-0.71] | 0.0072 | 0.64 | 0.66 | 0.64 |
|        | AB    | 0.69 | [0.68-0.71] | 0.0073 | 0.65 | 0.66 | 0.65 |
|        | AE    | 0.76 | [0.75-0.77] | 0.0067 | 0.7  | 0.71 | 0.7  |
| RFE    | LASSO | 0.69 | [0.68-0.71] | 0.0066 | 0.56 | 0.78 | 0.53 |
|        | LDA   | 0.66 | [0.64-0.67] | 0.0076 | 0.59 | 0.65 | 0.58 |
|        | LR    | 0.68 | [0.66-0.69] | 0.0067 | 0.55 | 0.75 | 0.53 |
|        | NB    | 0.64 | [0.63-0.65] | 0.0058 | 0.53 | 0.75 | 0.5  |
|        | RF    | 0.72 | [0.7-0.73]  | 0.0071 | 0.66 | 0.69 | 0.65 |
|        | AB    | 0.73 | [0.71-0.74] | 0.0074 | 0.68 | 0.68 | 0.68 |
|        | AE    | 0.75 | [0.74-0.76] | 0.0066 | 0.69 | 0.68 | 0.69 |
| ANOVA  | LASSO | 0.74 | [0.73-0.75] | 0.0066 | 0.68 | 0.69 | 0.68 |
|        | LDA   | 0.67 | [0.66-0.68] | 0.007  | 0.65 | 0.67 | 0.65 |
|        | LR    | 0.75 | [0.74-0.77] | 0.0071 | 0.72 | 0.67 | 0.72 |
|        | NB    | 0.73 | [0.71-0.74] | 0.0068 | 0.68 | 0.7  | 0.67 |
|        | RF    | 0.65 | [0.63-0.66] | 0.0082 | 0.59 | 0.62 | 0.58 |
| KW     | AB    | 0.71 | [0.7-0.73]  | 0.0071 | 0.59 | 0.73 | 0.57 |
|        | AE    | 0.74 | [0.73-0.76] | 0.0066 | 0.67 | 0.73 | 0.66 |
|        | LASSO | 0.69 | [0.68-0.7]  | 0.0071 | 0.66 | 0.67 | 0.65 |
|        | LDA   | 0.61 | [0.59-0.62] | 0.0073 | 0.55 | 0.67 | 0.53 |
|        | LR    | 0.69 | [0.68-0.71] | 0.0071 | 0.66 | 0.67 | 0.66 |
|        | NB    | 0.79 | [0.77-0.8]  | 0.0063 | 0.74 | 0.7  | 0.75 |
|        | RF    | 0.64 | [0.62-0.66] | 0.0081 | 0.56 | 0.63 | 0.55 |
| Relief | AB    | 0.69 | [0.68-0.71] | 0.0077 | 0.59 | 0.71 | 0.58 |

Center\_12

|  |        |       |      |             |        |      |      |      |
|--|--------|-------|------|-------------|--------|------|------|------|
|  |        | AE    | 0.7  | [0.69-0.72] | 0.0075 | 0.65 | 0.68 | 0.64 |
|  |        | LASSO | 0.71 | [0.69-0.72] | 0.0068 | 0.63 | 0.72 | 0.62 |
|  |        | LDA   | 0.65 | [0.63-0.66] | 0.0068 | 0.61 | 0.65 | 0.61 |
|  |        | LR    | 0.65 | [0.64-0.67] | 0.0071 | 0.59 | 0.7  | 0.58 |
|  |        | NB    | 0.6  | [0.59-0.62] | 0.0083 | 0.7  | 0.45 | 0.73 |
|  |        | RF    | 0.63 | [0.62-0.65] | 0.0083 | 0.59 | 0.59 | 0.59 |
|  |        | AB    | 0.67 | [0.66-0.69] | 0.007  | 0.56 | 0.74 | 0.53 |
|  |        | AE    | 0.71 | [0.69-0.72] | 0.0069 | 0.62 | 0.68 | 0.61 |
|  |        | LASSO | 0.73 | [0.71-0.74] | 0.0069 | 0.67 | 0.7  | 0.67 |
|  | RFE    | LDA   | 0.66 | [0.64-0.67] | 0.0072 | 0.6  | 0.66 | 0.59 |
|  |        | LR    | 0.75 | [0.74-0.76] | 0.0073 | 0.73 | 0.66 | 0.74 |
|  |        | NB    | 0.61 | [0.59-0.62] | 0.008  | 0.57 | 0.6  | 0.56 |
|  |        | RF    | 0.68 | [0.67-0.7]  | 0.0075 | 0.63 | 0.66 | 0.62 |
|  |        | AB    | 0.76 | [0.74-0.77] | 0.0065 | 0.67 | 0.69 | 0.67 |
|  |        | AE    | 0.74 | [0.73-0.76] | 0.0068 | 0.73 | 0.64 | 0.74 |
|  |        | LASSO | 0.8  | [0.79-0.81] | 0.0059 | 0.73 | 0.75 | 0.72 |
|  | ANOVA  | LDA   | 0.78 | [0.77-0.8]  | 0.0061 | 0.74 | 0.71 | 0.74 |
|  |        | LR    | 0.8  | [0.79-0.81] | 0.0058 | 0.73 | 0.75 | 0.73 |
|  |        | NB    | 0.73 | [0.72-0.75] | 0.0061 | 0.67 | 0.71 | 0.67 |
|  |        | RF    | 0.78 | [0.76-0.79] | 0.0062 | 0.7  | 0.71 | 0.7  |
|  |        | AB    | 0.76 | [0.75-0.77] | 0.0066 | 0.68 | 0.7  | 0.68 |
|  |        | AE    | 0.75 | [0.74-0.76] | 0.0064 | 0.6  | 0.79 | 0.58 |
|  |        | LASSO | 0.8  | [0.79-0.81] | 0.0057 | 0.71 | 0.74 | 0.7  |
|  | KW     | LDA   | 0.79 | [0.78-0.8]  | 0.0063 | 0.71 | 0.73 | 0.71 |
|  |        | LR    | 0.8  | [0.79-0.81] | 0.0058 | 0.71 | 0.76 | 0.7  |
|  |        | NB    | 0.72 | [0.71-0.73] | 0.0062 | 0.66 | 0.72 | 0.65 |
|  |        | RF    | 0.77 | [0.75-0.78] | 0.0063 | 0.67 | 0.72 | 0.67 |
|  |        | AB    | 0.74 | [0.72-0.75] | 0.0069 | 0.66 | 0.7  | 0.66 |
|  |        | AE    | 0.76 | [0.75-0.78] | 0.0062 | 0.67 | 0.75 | 0.66 |
|  |        | LASSO | 0.78 | [0.76-0.79] | 0.0062 | 0.69 | 0.74 | 0.69 |
|  | Relief | LDA   | 0.76 | [0.75-0.77] | 0.0062 | 0.66 | 0.77 | 0.65 |
|  |        | LR    | 0.79 | [0.77-0.8]  | 0.0059 | 0.71 | 0.74 | 0.71 |
|  |        | NB    | 0.7  | [0.68-0.71] | 0.0071 | 0.75 | 0.56 | 0.77 |
|  |        | RF    | 0.75 | [0.74-0.77] | 0.0062 | 0.61 | 0.77 | 0.59 |
|  |        | AB    | 0.73 | [0.72-0.74] | 0.0069 | 0.66 | 0.67 | 0.66 |
|  |        | AE    | 0.74 | [0.73-0.76] | 0.007  | 0.67 | 0.72 | 0.67 |
|  |        | LASSO | 0.76 | [0.74-0.77] | 0.0068 | 0.68 | 0.73 | 0.68 |
|  | RFE    | LDA   | 0.76 | [0.75-0.77] | 0.0069 | 0.71 | 0.71 | 0.71 |
|  |        | LR    | 0.75 | [0.74-0.76] | 0.0068 | 0.68 | 0.72 | 0.68 |
|  |        | NB    | 0.69 | [0.67-0.7]  | 0.0065 | 0.65 | 0.67 | 0.64 |
|  |        | RF    | 0.75 | [0.74-0.76] | 0.0062 | 0.64 | 0.72 | 0.64 |

Center\_13



|                  |        |       |             |             |        |      |      |      |
|------------------|--------|-------|-------------|-------------|--------|------|------|------|
| <b>Center_14</b> | ANOVA  | AB    | 0.75        | [0.74-0.77] | 0.0063 | 0.7  | 0.7  | 0.7  |
|                  |        | AE    | 0.77        | [0.76-0.78] | 0.0063 | 0.7  | 0.71 | 0.7  |
|                  |        | LASSO | 0.78        | [0.77-0.79] | 0.006  | 0.71 | 0.74 | 0.71 |
|                  |        | LDA   | 0.74        | [0.73-0.75] | 0.0063 | 0.66 | 0.7  | 0.65 |
|                  |        | LR    | 0.78        | [0.77-0.79] | 0.006  | 0.71 | 0.74 | 0.71 |
|                  |        | NB    | 0.75        | [0.74-0.77] | 0.0063 | 0.71 | 0.71 | 0.71 |
|                  |        | RF    | 0.69        | [0.68-0.71] | 0.0073 | 0.63 | 0.64 | 0.63 |
|                  | KW     | AB    | 0.75        | [0.74-0.76] | 0.0065 | 0.68 | 0.71 | 0.68 |
|                  |        | AE    | 0.77        | [0.76-0.78] | 0.0062 | 0.7  | 0.71 | 0.7  |
|                  |        | LASSO | 0.8         | [0.79-0.81] | 0.0057 | 0.72 | 0.75 | 0.72 |
|                  |        | LDA   | 0.78        | [0.77-0.79] | 0.0061 | 0.71 | 0.72 | 0.7  |
|                  |        | LR    | 0.8         | [0.79-0.81] | 0.0056 | 0.72 | 0.74 | 0.72 |
|                  |        | NB    | 0.79        | [0.78-0.81] | 0.0059 | 0.72 | 0.75 | 0.71 |
|                  |        | RF    | 0.73        | [0.72-0.75] | 0.0064 | 0.68 | 0.69 | 0.68 |
|                  | Relief | AB    | 0.73        | [0.72-0.74] | 0.0064 | 0.62 | 0.75 | 0.61 |
|                  |        | AE    | 0.77        | [0.76-0.78] | 0.006  | 0.7  | 0.73 | 0.69 |
|                  |        | LASSO | 0.78        | [0.77-0.79] | 0.0059 | 0.71 | 0.73 | 0.71 |
|                  |        | LDA   | 0.74        | [0.73-0.76] | 0.0062 | 0.67 | 0.73 | 0.67 |
|                  |        | LR    | 0.79        | [0.78-0.8]  | 0.0059 | 0.71 | 0.74 | 0.7  |
|                  |        | NB    | 0.64        | [0.62-0.65] | 0.0075 | 0.67 | 0.58 | 0.68 |
|                  |        | RF    | 0.69        | [0.67-0.7]  | 0.0072 | 0.59 | 0.68 | 0.58 |
| RFE              | AB     | 0.72  | [0.71-0.73] | 0.0066      | 0.63   | 0.71 | 0.62 |      |
|                  | AE     | 0.78  | [0.77-0.79] | 0.0058      | 0.7    | 0.73 | 0.7  |      |
|                  | LASSO  | 0.77  | [0.76-0.78] | 0.006       | 0.67   | 0.75 | 0.66 |      |
|                  | LDA    | 0.78  | [0.77-0.79] | 0.006       | 0.68   | 0.74 | 0.68 |      |
|                  | LR     | 0.78  | [0.76-0.79] | 0.006       | 0.68   | 0.74 | 0.67 |      |
|                  | NB     | 0.71  | [0.69-0.72] | 0.0064      | 0.64   | 0.71 | 0.64 |      |
|                  | RF     | 0.68  | [0.67-0.69] | 0.0071      | 0.59   | 0.68 | 0.57 |      |
| <b>Center_15</b> | ANOVA  | AB    | 0.55        | [0.54-0.57] | 0.0074 | 0.55 | 0.57 | 0.55 |
|                  |        | AE    | 0.61        | [0.6-0.63]  | 0.007  | 0.57 | 0.6  | 0.56 |
|                  |        | LASSO | 0.67        | [0.66-0.68] | 0.0067 | 0.6  | 0.67 | 0.59 |
|                  |        | LDA   | 0.6         | [0.58-0.61] | 0.0072 | 0.53 | 0.67 | 0.51 |
|                  |        | LR    | 0.66        | [0.64-0.67] | 0.0069 | 0.57 | 0.69 | 0.56 |
|                  |        | NB    | 0.71        | [0.7-0.72]  | 0.0059 | 0.63 | 0.74 | 0.61 |
|                  |        | RF    | 0.56        | [0.54-0.57] | 0.0078 | 0.57 | 0.52 | 0.57 |
|                  | KW     | AB    | 0.55        | [0.54-0.57] | 0.0074 | 0.54 | 0.59 | 0.54 |
|                  |        | AE    | 0.56        | [0.55-0.57] | 0.0069 | 0.3  | 0.92 | 0.22 |
|                  |        | LASSO | 0.66        | [0.64-0.67] | 0.0078 | 0.59 | 0.67 | 0.58 |
|                  |        | LDA   | 0.7         | [0.69-0.72] | 0.0071 | 0.64 | 0.68 | 0.63 |
|                  |        | LR    | 0.68        | [0.66-0.69] | 0.0075 | 0.61 | 0.69 | 0.6  |
|                  |        | NB    | 0.54        | [0.52-0.56] | 0.0081 | 0.53 | 0.56 | 0.52 |

|  |        |       |      |             |        |      |      |      |
|--|--------|-------|------|-------------|--------|------|------|------|
|  |        | RF    | 0.54 | [0.52-0.55] | 0.0076 | 0.54 | 0.54 | 0.54 |
|  |        | AB    | 0.62 | [0.6-0.63]  | 0.0068 | 0.53 | 0.71 | 0.5  |
|  |        | AE    | 0.6  | [0.59-0.62] | 0.0077 | 0.46 | 0.71 | 0.43 |
|  |        | LASSO | 0.58 | [0.57-0.6]  | 0.0078 | 0.56 | 0.57 | 0.56 |
|  | Relief | LDA   | 0.61 | [0.59-0.62] | 0.0073 | 0.56 | 0.62 | 0.55 |
|  |        | LR    | 0.64 | [0.62-0.65] | 0.0077 | 0.6  | 0.61 | 0.6  |
|  |        | NB    | 0.51 | [0.49-0.52] | 0.0078 | 0.51 | 0.54 | 0.5  |
|  |        | RF    | 0.59 | [0.57-0.6]  | 0.0078 | 0.54 | 0.61 | 0.53 |
|  |        | AB    | 0.62 | [0.61-0.64] | 0.0061 | 0.57 | 0.73 | 0.55 |
|  |        | AE    | 0.56 | [0.54-0.57] | 0.0077 | 0.46 | 0.71 | 0.42 |
|  | RFE    | LASSO | 0.75 | [0.74-0.76] | 0.0059 | 0.6  | 0.8  | 0.57 |
|  |        | LDA   | 0.62 | [0.61-0.64] | 0.007  | 0.45 | 0.79 | 0.4  |
|  |        | LR    | 0.63 | [0.61-0.64] | 0.0075 | 0.6  | 0.61 | 0.6  |
|  |        | NB    | 0.61 | [0.59-0.62] | 0.0068 | 0.46 | 0.79 | 0.42 |
|  |        | RF    | 0.57 | [0.55-0.58] | 0.0074 | 0.52 | 0.62 | 0.51 |
|  |        | AB    | 0.73 | [0.72-0.74] | 0.0068 | 0.67 | 0.71 | 0.66 |
|  |        | AE    | 0.75 | [0.74-0.76] | 0.0062 | 0.61 | 0.81 | 0.58 |
|  |        | LASSO | 0.77 | [0.76-0.78] | 0.0059 | 0.71 | 0.72 | 0.71 |
|  | ANOVA  | LDA   | 0.74 | [0.72-0.75] | 0.0065 | 0.67 | 0.72 | 0.66 |
|  |        | LR    | 0.77 | [0.76-0.78] | 0.006  | 0.72 | 0.72 | 0.72 |
|  |        | NB    | 0.7  | [0.69-0.72] | 0.0067 | 0.69 | 0.68 | 0.69 |
|  |        | RF    | 0.67 | [0.65-0.68] | 0.0077 | 0.63 | 0.64 | 0.63 |
|  |        | AB    | 0.73 | [0.71-0.74] | 0.0068 | 0.66 | 0.67 | 0.66 |
|  |        | AE    | 0.77 | [0.75-0.78] | 0.0064 | 0.63 | 0.8  | 0.6  |
|  |        | LASSO | 0.79 | [0.77-0.8]  | 0.0061 | 0.71 | 0.72 | 0.71 |
|  | KW     | LDA   | 0.79 | [0.77-0.8]  | 0.0062 | 0.7  | 0.73 | 0.7  |
|  |        | LR    | 0.79 | [0.78-0.8]  | 0.006  | 0.67 | 0.78 | 0.66 |
|  |        | NB    | 0.73 | [0.72-0.74] | 0.0067 | 0.69 | 0.71 | 0.69 |
|  |        | RF    | 0.63 | [0.62-0.65] | 0.0076 | 0.54 | 0.67 | 0.52 |
|  |        | AB    | 0.66 | [0.64-0.67] | 0.0071 | 0.6  | 0.68 | 0.59 |
|  |        | AE    | 0.73 | [0.71-0.74] | 0.0068 | 0.54 | 0.82 | 0.51 |
|  |        | LASSO | 0.66 | [0.65-0.67] | 0.0068 | 0.55 | 0.75 | 0.53 |
|  | Relief | LDA   | 0.73 | [0.71-0.74] | 0.007  | 0.68 | 0.69 | 0.68 |
|  |        | LR    | 0.71 | [0.69-0.72] | 0.0069 | 0.62 | 0.72 | 0.61 |
|  |        | NB    | 0.57 | [0.56-0.59] | 0.0065 | 0.4  | 0.82 | 0.35 |
|  |        | RF    | 0.62 | [0.61-0.64] | 0.0078 | 0.53 | 0.64 | 0.52 |
|  |        | AB    | 0.66 | [0.64-0.67] | 0.0076 | 0.61 | 0.64 | 0.6  |
|  |        | AE    | 0.75 | [0.74-0.76] | 0.007  | 0.67 | 0.71 | 0.67 |
|  | RFE    | LASSO | 0.7  | [0.68-0.71] | 0.0072 | 0.65 | 0.67 | 0.65 |
|  |        | LDA   | 0.68 | [0.67-0.7]  | 0.0076 | 0.62 | 0.64 | 0.62 |
|  |        | LR    | 0.69 | [0.68-0.7]  | 0.0071 | 0.65 | 0.66 | 0.65 |

Center\_16

|  |        |       |      |             |        |      |      |      |
|--|--------|-------|------|-------------|--------|------|------|------|
|  |        | NB    | 0.57 | [0.56-0.59] | 0.0065 | 0.4  | 0.82 | 0.35 |
|  |        | RF    | 0.65 | [0.63-0.66] | 0.0078 | 0.58 | 0.65 | 0.57 |
|  |        | AB    | 0.65 | [0.64-0.67] | 0.0073 | 0.62 | 0.6  | 0.62 |
|  |        | AE    | 0.76 | [0.74-0.77] | 0.0064 | 0.66 | 0.72 | 0.65 |
|  |        | LASSO | 0.73 | [0.71-0.74] | 0.0062 | 0.67 | 0.73 | 0.66 |
|  | ANOVA  | LDA   | 0.71 | [0.69-0.72] | 0.0064 | 0.65 | 0.7  | 0.65 |
|  |        | LR    | 0.72 | [0.7-0.73]  | 0.0064 | 0.67 | 0.71 | 0.66 |
|  |        | NB    | 0.69 | [0.68-0.71] | 0.0069 | 0.67 | 0.68 | 0.67 |
|  |        | RF    | 0.56 | [0.55-0.58] | 0.0076 | 0.53 | 0.6  | 0.53 |
|  |        | AB    | 0.55 | [0.54-0.57] | 0.0079 | 0.52 | 0.56 | 0.52 |
|  |        | AE    | 0.78 | [0.77-0.79] | 0.0063 | 0.67 | 0.77 | 0.66 |
|  |        | LASSO | 0.71 | [0.69-0.72] | 0.0064 | 0.63 | 0.72 | 0.62 |
|  | KW     | LDA   | 0.68 | [0.67-0.69] | 0.0065 | 0.64 | 0.67 | 0.63 |
|  |        | LR    | 0.7  | [0.69-0.71] | 0.0063 | 0.63 | 0.71 | 0.62 |
|  |        | NB    | 0.69 | [0.68-0.71] | 0.0067 | 0.68 | 0.68 | 0.68 |
|  |        | RF    | 0.54 | [0.53-0.56] | 0.0072 | 0.56 | 0.53 | 0.57 |
|  |        | AB    | 0.58 | [0.56-0.59] | 0.008  | 0.53 | 0.58 | 0.52 |
|  |        | AE    | 0.74 | [0.72-0.75] | 0.007  | 0.66 | 0.71 | 0.66 |
|  |        | LASSO | 0.64 | [0.63-0.66] | 0.0079 | 0.59 | 0.65 | 0.58 |
|  | Relief | LDA   | 0.63 | [0.62-0.65] | 0.0079 | 0.59 | 0.65 | 0.58 |
|  |        | LR    | 0.69 | [0.67-0.7]  | 0.0073 | 0.6  | 0.72 | 0.59 |
|  |        | NB    | 0.56 | [0.55-0.58] | 0.0078 | 0.54 | 0.62 | 0.54 |
|  |        | RF    | 0.6  | [0.58-0.61] | 0.008  | 0.41 | 0.77 | 0.37 |
|  |        | AB    | 0.56 | [0.55-0.58] | 0.0079 | 0.54 | 0.6  | 0.53 |
|  |        | AE    | 0.76 | [0.74-0.77] | 0.0065 | 0.67 | 0.74 | 0.66 |
|  |        | LASSO | 0.7  | [0.68-0.71] | 0.0065 | 0.66 | 0.7  | 0.66 |
|  | RFE    | LDA   | 0.68 | [0.66-0.69] | 0.0067 | 0.64 | 0.7  | 0.63 |
|  |        | LR    | 0.72 | [0.71-0.73] | 0.0063 | 0.66 | 0.73 | 0.65 |
|  |        | NB    | 0.57 | [0.55-0.58] | 0.0067 | 0.39 | 0.82 | 0.34 |
|  |        | RF    | 0.58 | [0.56-0.59] | 0.0074 | 0.57 | 0.58 | 0.57 |
|  |        | AB    | 0.74 | [0.73-0.75] | 0.0069 | 0.76 | 0.62 | 0.78 |
|  |        | AE    | 0.71 | [0.69-0.72] | 0.0067 | 0.64 | 0.69 | 0.63 |
|  |        | LASSO | 0.77 | [0.76-0.79] | 0.0062 | 0.73 | 0.7  | 0.74 |
|  | ANOVA  | LDA   | 0.75 | [0.74-0.77] | 0.0065 | 0.67 | 0.73 | 0.67 |
|  |        | LR    | 0.77 | [0.76-0.78] | 0.0062 | 0.74 | 0.68 | 0.75 |
|  |        | NB    | 0.77 | [0.76-0.79] | 0.0061 | 0.71 | 0.73 | 0.71 |
|  |        | RF    | 0.76 | [0.74-0.77] | 0.0065 | 0.7  | 0.71 | 0.69 |
|  |        | AB    | 0.69 | [0.68-0.71] | 0.007  | 0.57 | 0.73 | 0.55 |
|  |        | AE    | 0.71 | [0.7-0.73]  | 0.0067 | 0.66 | 0.66 | 0.66 |
|  |        | LASSO | 0.75 | [0.74-0.77] | 0.0064 | 0.69 | 0.71 | 0.69 |
|  | KW     | LDA   | 0.62 | [0.61-0.63] | 0.0066 | 0.53 | 0.74 | 0.51 |

|        |       |      |             |        |      |      |      |
|--------|-------|------|-------------|--------|------|------|------|
|        | LR    | 0.58 | [0.56-0.59] | 0.0066 | 0.53 | 0.7  | 0.5  |
|        | NB    | 0.76 | [0.75-0.77] | 0.0058 | 0.71 | 0.72 | 0.71 |
|        | RF    | 0.69 | [0.68-0.71] | 0.0072 | 0.6  | 0.69 | 0.59 |
| Relief | AB    | 0.56 | [0.55-0.58] | 0.0076 | 0.57 | 0.58 | 0.57 |
|        | AE    | 0.74 | [0.73-0.75] | 0.0066 | 0.68 | 0.68 | 0.68 |
|        | LASSO | 0.58 | [0.56-0.59] | 0.0073 | 0.54 | 0.63 | 0.52 |
|        | LDA   | 0.66 | [0.65-0.67] | 0.0073 | 0.61 | 0.64 | 0.6  |
|        | LR    | 0.67 | [0.66-0.69] | 0.0067 | 0.62 | 0.64 | 0.62 |
|        | NB    | 0.56 | [0.54-0.57] | 0.0075 | 0.56 | 0.61 | 0.55 |
|        | RF    | 0.68 | [0.67-0.69] | 0.0072 | 0.61 | 0.65 | 0.61 |
| RFE    | AB    | 0.7  | [0.68-0.71] | 0.0072 | 0.62 | 0.68 | 0.61 |
|        | AE    | 0.72 | [0.71-0.74] | 0.0069 | 0.67 | 0.68 | 0.66 |
|        | LASSO | 0.57 | [0.56-0.58] | 0.0067 | 0.53 | 0.68 | 0.51 |
|        | LDA   | 0.62 | [0.61-0.63] | 0.0067 | 0.59 | 0.65 | 0.58 |
|        | LR    | 0.57 | [0.56-0.58] | 0.0067 | 0.53 | 0.7  | 0.5  |
|        | NB    | 0.63 | [0.62-0.64] | 0.0065 | 0.53 | 0.73 | 0.5  |
|        | RF    | 0.69 | [0.67-0.7]  | 0.0069 | 0.62 | 0.68 | 0.61 |
| ANOVA  | AB    | 0.66 | [0.64-0.67] | 0.0079 | 0.64 | 0.6  | 0.65 |
|        | AE    | 0.67 | [0.66-0.69] | 0.0071 | 0.47 | 0.83 | 0.43 |
|        | LASSO | 0.71 | [0.7-0.72]  | 0.0069 | 0.65 | 0.7  | 0.64 |
|        | LDA   | 0.75 | [0.74-0.77] | 0.007  | 0.71 | 0.7  | 0.71 |
|        | LR    | 0.73 | [0.71-0.74] | 0.0072 | 0.69 | 0.66 | 0.69 |
|        | NB    | 0.72 | [0.7-0.73]  | 0.0069 | 0.66 | 0.7  | 0.65 |
|        | RF    | 0.58 | [0.57-0.6]  | 0.0077 | 0.41 | 0.78 | 0.36 |
| KW     | AB    | 0.63 | [0.61-0.64] | 0.0072 | 0.53 | 0.69 | 0.5  |
|        | AE    | 0.63 | [0.62-0.65] | 0.0075 | 0.58 | 0.65 | 0.57 |
|        | LASSO | 0.74 | [0.73-0.76] | 0.0066 | 0.69 | 0.71 | 0.69 |
|        | LDA   | 0.74 | [0.73-0.75] | 0.0066 | 0.68 | 0.7  | 0.68 |
|        | LR    | 0.61 | [0.6-0.62]  | 0.0069 | 0.58 | 0.67 | 0.57 |
|        | NB    | 0.74 | [0.73-0.76] | 0.0067 | 0.69 | 0.71 | 0.69 |
|        | RF    | 0.55 | [0.54-0.57] | 0.0075 | 0.36 | 0.82 | 0.29 |
| Relief | AB    | 0.62 | [0.61-0.64] | 0.0079 | 0.57 | 0.61 | 0.56 |
|        | AE    | 0.73 | [0.71-0.74] | 0.0067 | 0.66 | 0.69 | 0.65 |
|        | LASSO | 0.61 | [0.6-0.63]  | 0.007  | 0.51 | 0.77 | 0.47 |
|        | LDA   | 0.66 | [0.64-0.68] | 0.0081 | 0.64 | 0.64 | 0.64 |
|        | LR    | 0.58 | [0.56-0.59] | 0.0069 | 0.45 | 0.8  | 0.41 |
|        | NB    | 0.51 | [0.49-0.52] | 0.0078 | 0.51 | 0.53 | 0.5  |
|        | RF    | 0.55 | [0.54-0.57] | 0.0071 | 0.53 | 0.59 | 0.53 |
| RFE    | AB    | 0.66 | [0.64-0.67] | 0.007  | 0.56 | 0.7  | 0.54 |
|        | AE    | 0.65 | [0.64-0.67] | 0.0071 | 0.59 | 0.67 | 0.58 |
|        | LASSO | 0.66 | [0.64-0.67] | 0.007  | 0.54 | 0.75 | 0.51 |

Center\_19

---

|     |      |             |        |      |      |      |
|-----|------|-------------|--------|------|------|------|
| LDA | 0.64 | [0.63-0.66] | 0.0072 | 0.53 | 0.75 | 0.5  |
| LR  | 0.67 | [0.66-0.68] | 0.0069 | 0.55 | 0.74 | 0.53 |
| NB  | 0.63 | [0.62-0.64] | 0.0067 | 0.53 | 0.75 | 0.5  |
| RF  | 0.53 | [0.51-0.54] | 0.0073 | 0.52 | 0.57 | 0.52 |

---

**Supplemental Table 13.** Classification performance indices of different feature selector and classifiers in Strategy 429 for each center.

| Center    | FS     | Classifier | AUC         | 95% CIs     | Std    | Acc  | Sen  | Spe  |
|-----------|--------|------------|-------------|-------------|--------|------|------|------|
| Center_01 | ANOVA  | AB         | 0.65        | [0.55-0.74] | 0.0491 | 0.62 | 0.65 | 0.62 |
|           |        | AE         | 0.64        | [0.54-0.74] | 0.051  | 0.61 | 0.65 | 0.59 |
|           |        | LASSO      | 0.64        | [0.54-0.74] | 0.0523 | 0.61 | 0.62 | 0.61 |
|           |        | LDA        | 0.64        | [0.54-0.74] | 0.0517 | 0.61 | 0.65 | 0.6  |
|           |        | LR         | 0.64        | [0.54-0.74] | 0.0523 | 0.61 | 0.62 | 0.61 |
|           |        | NB         | 0.65        | [0.55-0.76] | 0.0519 | 0.68 | 0.57 | 0.72 |
|           |        | RF         | 0.64        | [0.54-0.74] | 0.0509 | 0.66 | 0.65 | 0.66 |
|           | KW     | AB         | 0.63        | [0.53-0.74] | 0.0529 | 0.59 | 0.68 | 0.56 |
|           |        | AE         | 0.63        | [0.53-0.74] | 0.0542 | 0.61 | 0.65 | 0.6  |
|           |        | LASSO      | 0.64        | [0.53-0.74] | 0.0516 | 0.57 | 0.72 | 0.51 |
|           |        | LDA        | 0.64        | [0.53-0.74] | 0.0518 | 0.57 | 0.7  | 0.52 |
|           |        | LR         | 0.62        | [0.52-0.72] | 0.0533 | 0.59 | 0.62 | 0.58 |
|           |        | NB         | 0.65        | [0.55-0.75] | 0.0517 | 0.68 | 0.57 | 0.72 |
|           |        | RF         | 0.6         | [0.5-0.71]  | 0.0543 | 0.57 | 0.65 | 0.54 |
|           | Relief | AB         | 0.64        | [0.53-0.74] | 0.0533 | 0.58 | 0.75 | 0.52 |
|           |        | AE         | 0.61        | [0.5-0.71]  | 0.0554 | 0.58 | 0.68 | 0.54 |
|           |        | LASSO      | 0.62        | [0.5-0.72]  | 0.0537 | 0.62 | 0.62 | 0.62 |
|           |        | LDA        | 0.61        | [0.49-0.72] | 0.0555 | 0.61 | 0.62 | 0.61 |
|           |        | LR         | 0.67        | [0.57-0.76] | 0.0498 | 0.66 | 0.68 | 0.65 |
|           |        | NB         | 0.65        | [0.54-0.75] | 0.0519 | 0.68 | 0.57 | 0.71 |
|           |        | RF         | 0.6         | [0.49-0.71] | 0.0557 | 0.6  | 0.68 | 0.57 |
| RFE       | AB     | 0.64       | [0.54-0.73] | 0.0496      | 0.57   | 0.75 | 0.51 |      |
|           | AE     | 0.63       | [0.52-0.73] | 0.0527      | 0.57   | 0.7  | 0.53 |      |
|           | LASSO  | 0.65       | [0.55-0.76] | 0.0531      | 0.76   | 0.35 | 0.9  |      |
|           | LDA    | 0.63       | [0.52-0.74] | 0.0553      | 0.57   | 0.75 | 0.5  |      |
|           | LR     | 0.63       | [0.52-0.74] | 0.0535      | 0.62   | 0.65 | 0.61 |      |
|           | NB     | 0.67       | [0.56-0.76] | 0.0506      | 0.66   | 0.62 | 0.68 |      |
|           | RF     | 0.61       | [0.51-0.72] | 0.0541      | 0.59   | 0.7  | 0.54 |      |
| Center_02 | ANOVA  | AB         | 0.86        | [0.8-0.9]   | 0.0244 | 0.8  | 0.87 | 0.74 |
|           |        | AE         | 0.86        | [0.8-0.9]   | 0.0252 | 0.8  | 0.81 | 0.8  |
|           |        | LASSO      | 0.86        | [0.8-0.9]   | 0.0253 | 0.81 | 0.82 | 0.8  |
|           |        | LDA        | 0.85        | [0.8-0.9]   | 0.0248 | 0.8  | 0.81 | 0.8  |
|           |        | LR         | 0.85        | [0.8-0.9]   | 0.0251 | 0.8  | 0.81 | 0.79 |
|           |        | NB         | 0.84        | [0.78-0.88] | 0.0258 | 0.78 | 0.68 | 0.86 |
|           |        | RF         | 0.93        | [0.89-0.96] | 0.018  | 0.85 | 0.9  | 0.81 |
|           | KW     | AB         | 0.86        | [0.8-0.9]   | 0.0244 | 0.79 | 0.83 | 0.76 |
|           |        | AE         | 0.86        | [0.8-0.9]   | 0.0247 | 0.79 | 0.79 | 0.79 |
|           |        | LASSO      | 0.86        | [0.8-0.9]   | 0.0246 | 0.79 | 0.82 | 0.77 |

|        |       |      |             |        |      |      |      |
|--------|-------|------|-------------|--------|------|------|------|
|        | LDA   | 0.85 | [0.79-0.9]  | 0.0257 | 0.79 | 0.79 | 0.79 |
|        | LR    | 0.85 | [0.79-0.9]  | 0.0259 | 0.8  | 0.82 | 0.79 |
|        | NB    | 0.84 | [0.78-0.89] | 0.0256 | 0.77 | 0.79 | 0.76 |
|        | RF    | 0.93 | [0.9-0.96]  | 0.0162 | 0.85 | 0.9  | 0.82 |
|        | AB    | 0.86 | [0.81-0.9]  | 0.0239 | 0.81 | 0.83 | 0.79 |
|        | AE    | 0.85 | [0.8-0.9]   | 0.0252 | 0.79 | 0.82 | 0.77 |
|        | LASSO | 0.85 | [0.8-0.9]   | 0.0252 | 0.8  | 0.82 | 0.79 |
| Relief | LDA   | 0.84 | [0.79-0.89] | 0.0258 | 0.8  | 0.81 | 0.79 |
|        | LR    | 0.84 | [0.78-0.89] | 0.0265 | 0.78 | 0.85 | 0.74 |
|        | NB    | 0.82 | [0.76-0.87] | 0.0266 | 0.76 | 0.77 | 0.75 |
|        | RF    | 0.93 | [0.89-0.96] | 0.0163 | 0.86 | 0.89 | 0.84 |
|        | AB    | 0.86 | [0.8-0.9]   | 0.0248 | 0.8  | 0.81 | 0.8  |
|        | AE    | 0.86 | [0.8-0.9]   | 0.0244 | 0.77 | 0.79 | 0.76 |
|        | LASSO | 0.86 | [0.8-0.91]  | 0.0246 | 0.81 | 0.82 | 0.8  |
| RFE    | LDA   | 0.86 | [0.81-0.9]  | 0.0247 | 0.81 | 0.83 | 0.81 |
|        | LR    | 0.85 | [0.79-0.9]  | 0.0254 | 0.78 | 0.82 | 0.76 |
|        | NB    | 0.82 | [0.77-0.87] | 0.0261 | 0.74 | 0.79 | 0.71 |
|        | RF    | 0.92 | [0.88-0.96] | 0.0185 | 0.87 | 0.87 | 0.86 |
|        | AB    | 0.97 | [0.95-0.99] | 0.0108 | 0.96 | 1    | 0.96 |
|        | AE    | 0.97 | [0.95-0.99] | 0.0108 | 0.95 | 1    | 0.95 |
|        | LASSO | 0.97 | [0.94-0.99] | 0.0144 | 0.93 | 1    | 0.93 |
| ANOVA  | LDA   | 0.96 | [0.93-0.99] | 0.015  | 0.92 | 1    | 0.92 |
|        | LR    | 0.96 | [0.92-0.99] | 0.0176 | 0.91 | 1    | 0.9  |
|        | NB    | 0.96 | [0.93-0.98] | 0.015  | 0.92 | 1    | 0.91 |
|        | RF    | 0.95 | [0.92-0.97] | 0.0144 | 0.92 | 1    | 0.92 |
|        | AB    | 0.95 | [0.91-0.98] | 0.0195 | 0.89 | 1    | 0.89 |
|        | AE    | 0.96 | [0.93-0.99] | 0.015  | 0.92 | 1    | 0.92 |
|        | LASSO | 0.96 | [0.93-0.99] | 0.0153 | 0.92 | 1    | 0.92 |
| KW     | LDA   | 0.96 | [0.92-0.99] | 0.0161 | 0.93 | 1    | 0.93 |
|        | LR    | 0.94 | [0.89-0.98] | 0.0236 | 0.87 | 1    | 0.87 |
|        | NB    | 0.95 | [0.91-0.99] | 0.0186 | 0.92 | 1    | 0.91 |
|        | RF    | 0.95 | [0.91-0.98] | 0.0164 | 0.91 | 1    | 0.91 |
|        | AB    | 0.95 | [0.9-0.99]  | 0.0238 | 0.88 | 1    | 0.88 |
|        | AE    | 0.98 | [0.95-1]    | 0.0113 | 0.95 | 1    | 0.95 |
|        | LASSO | 0.95 | [0.91-0.99] | 0.019  | 0.92 | 1    | 0.91 |
| Relief | LDA   | 0.96 | [0.92-0.99] | 0.0167 | 0.91 | 1    | 0.91 |
|        | LR    | 0.95 | [0.89-0.99] | 0.0256 | 0.87 | 1    | 0.86 |
|        | NB    | 0.73 | [0.31-0.97] | 0.184  | 0.77 | 0.8  | 0.77 |
|        | RF    | 0.95 | [0.89-0.99] | 0.025  | 0.87 | 1    | 0.86 |
|        | AB    | 0.87 | [0.73-0.98] | 0.0609 | 0.71 | 1    | 0.7  |
| RFE    | AE    | 0.95 | [0.91-0.98] | 0.0202 | 0.89 | 1    | 0.89 |

Center\_03

|                  |        |       |             |             |        |      |      |      |
|------------------|--------|-------|-------------|-------------|--------|------|------|------|
| <b>Center_04</b> |        | LASSO | 0.95        | [0.9-0.99]  | 0.0242 | 0.89 | 1    | 0.89 |
|                  |        | LDA   | 0.97        | [0.93-0.99] | 0.0151 | 0.92 | 1    | 0.92 |
|                  |        | LR    | 0.95        | [0.91-0.99] | 0.0181 | 0.92 | 1    | 0.92 |
|                  |        | NB    | 0.72        | [0.3-0.96]  | 0.188  | 0.8  | 0.8  | 0.8  |
|                  |        | RF    | 0.95        | [0.9-0.98]  | 0.0217 | 0.88 | 1    | 0.88 |
|                  | ANOVA  | AB    | 0.87        | [0.82-0.9]  | 0.0204 | 0.79 | 0.87 | 0.76 |
|                  |        | AE    | 0.87        | [0.83-0.91] | 0.0197 | 0.81 | 0.85 | 0.8  |
|                  |        | LASSO | 0.86        | [0.82-0.9]  | 0.0198 | 0.79 | 0.86 | 0.77 |
|                  |        | LDA   | 0.86        | [0.83-0.9]  | 0.0191 | 0.8  | 0.87 | 0.78 |
|                  |        | LR    | 0.86        | [0.82-0.9]  | 0.0201 | 0.79 | 0.87 | 0.77 |
|                  | KW     | NB    | 0.86        | [0.81-0.9]  | 0.0213 | 0.79 | 0.85 | 0.78 |
|                  |        | RF    | 0.88        | [0.85-0.92] | 0.0181 | 0.84 | 0.85 | 0.83 |
|                  |        | AB    | 0.87        | [0.83-0.91] | 0.02   | 0.79 | 0.85 | 0.78 |
|                  |        | AE    | 0.88        | [0.84-0.91] | 0.0192 | 0.77 | 0.92 | 0.73 |
|                  |        | LASSO | 0.86        | [0.82-0.9]  | 0.0206 | 0.76 | 0.89 | 0.73 |
|                  | Relief | LDA   | 0.86        | [0.82-0.9]  | 0.0202 | 0.8  | 0.85 | 0.79 |
|                  |        | LR    | 0.86        | [0.82-0.9]  | 0.0202 | 0.76 | 0.92 | 0.71 |
|                  |        | NB    | 0.86        | [0.82-0.9]  | 0.0208 | 0.75 | 0.93 | 0.7  |
|                  |        | RF    | 0.88        | [0.84-0.91] | 0.018  | 0.8  | 0.88 | 0.78 |
|                  |        | AB    | 0.86        | [0.82-0.9]  | 0.0211 | 0.77 | 0.87 | 0.74 |
| RFE              | AE     | 0.88  | [0.84-0.91] | 0.0192      | 0.78   | 0.9  | 0.74 |      |
|                  | LASSO  | 0.88  | [0.84-0.92] | 0.0188      | 0.79   | 0.89 | 0.75 |      |
|                  | LDA    | 0.87  | [0.83-0.91] | 0.0194      | 0.79   | 0.89 | 0.76 |      |
|                  | LR     | 0.87  | [0.84-0.91] | 0.0194      | 0.78   | 0.9  | 0.74 |      |
|                  | NB     | 0.84  | [0.79-0.89] | 0.0242      | 0.79   | 0.82 | 0.78 |      |
| ANOVA            | RF     | 0.87  | [0.83-0.91] | 0.02        | 0.78   | 0.94 | 0.73 |      |
|                  | AB     | 0.87  | [0.83-0.91] | 0.0196      | 0.79   | 0.88 | 0.76 |      |
|                  | AE     | 0.88  | [0.84-0.92] | 0.0187      | 0.76   | 0.89 | 0.73 |      |
|                  | LASSO  | 0.87  | [0.83-0.9]  | 0.0199      | 0.79   | 0.87 | 0.76 |      |
|                  | LDA    | 0.87  | [0.83-0.91] | 0.0203      | 0.82   | 0.83 | 0.81 |      |
| KW               | LR     | 0.86  | [0.82-0.9]  | 0.02        | 0.8    | 0.85 | 0.79 |      |
|                  | NB     | 0.87  | [0.82-0.9]  | 0.0206      | 0.81   | 0.85 | 0.8  |      |
|                  | RF     | 0.88  | [0.84-0.91] | 0.0186      | 0.75   | 0.95 | 0.7  |      |
|                  | AB     | 0.78  | [0.72-0.84] | 0.0289      | 0.73   | 0.75 | 0.72 |      |
|                  | AE     | 0.84  | [0.79-0.89] | 0.024       | 0.79   | 0.86 | 0.77 |      |
| <b>Center_05</b> | ANOVA  | LASSO | 0.82        | [0.77-0.87] | 0.025  | 0.77 | 0.79 | 0.77 |
|                  |        | LDA   | 0.81        | [0.75-0.86] | 0.0266 | 0.75 | 0.82 | 0.74 |
|                  |        | LR    | 0.82        | [0.76-0.87] | 0.0259 | 0.77 | 0.81 | 0.77 |
|                  |        | NB    | 0.8         | [0.74-0.85] | 0.0268 | 0.76 | 0.81 | 0.75 |
|                  |        | RF    | 0.79        | [0.73-0.84] | 0.028  | 0.74 | 0.77 | 0.74 |
| KW               | AB     | 0.82  | [0.77-0.86] | 0.0244      | 0.7    | 0.88 | 0.66 |      |



|           |        |       |      |             |        |      |      |      |
|-----------|--------|-------|------|-------------|--------|------|------|------|
|           |        | AE    | 0.85 | [0.8-0.89]  | 0.023  | 0.79 | 0.86 | 0.77 |
|           |        | LASSO | 0.83 | [0.77-0.87] | 0.0255 | 0.75 | 0.85 | 0.72 |
|           |        | LDA   | 0.81 | [0.76-0.87] | 0.0258 | 0.73 | 0.81 | 0.72 |
|           |        | LR    | 0.82 | [0.77-0.87] | 0.0252 | 0.77 | 0.78 | 0.77 |
|           |        | NB    | 0.81 | [0.76-0.86] | 0.0261 | 0.78 | 0.78 | 0.78 |
|           |        | RF    | 0.81 | [0.75-0.85] | 0.0252 | 0.69 | 0.92 | 0.63 |
|           |        | AB    | 0.79 | [0.73-0.84] | 0.0288 | 0.68 | 0.82 | 0.65 |
|           |        | AE    | 0.84 | [0.79-0.89] | 0.0232 | 0.76 | 0.88 | 0.73 |
|           | Relief | LASSO | 0.82 | [0.77-0.86] | 0.026  | 0.75 | 0.79 | 0.73 |
|           |        | LDA   | 0.8  | [0.74-0.85] | 0.0283 | 0.73 | 0.81 | 0.71 |
|           |        | LR    | 0.79 | [0.74-0.84] | 0.0261 | 0.74 | 0.75 | 0.73 |
|           |        | NB    | 0.8  | [0.74-0.85] | 0.0282 | 0.78 | 0.78 | 0.78 |
|           |        | RF    | 0.79 | [0.74-0.84] | 0.0276 | 0.72 | 0.77 | 0.71 |
|           |        | AB    | 0.81 | [0.75-0.86] | 0.0279 | 0.74 | 0.86 | 0.72 |
|           |        | AE    | 0.86 | [0.81-0.9]  | 0.0229 | 0.78 | 0.89 | 0.76 |
|           | RFE    | LASSO | 0.83 | [0.78-0.88] | 0.0249 | 0.72 | 0.89 | 0.68 |
|           |        | LDA   | 0.81 | [0.76-0.87] | 0.027  | 0.7  | 0.88 | 0.66 |
|           |        | LR    | 0.81 | [0.76-0.86] | 0.0259 | 0.77 | 0.79 | 0.77 |
|           |        | NB    | 0.81 | [0.76-0.86] | 0.0259 | 0.79 | 0.79 | 0.78 |
|           |        | RF    | 0.81 | [0.76-0.86] | 0.0257 | 0.7  | 0.85 | 0.67 |
|           |        | AB    | 0.79 | [0.74-0.83] | 0.0224 | 0.72 | 0.8  | 0.67 |
|           |        | AE    | 0.8  | [0.75-0.84] | 0.0212 | 0.73 | 0.79 | 0.7  |
|           | ANOVA  | LASSO | 0.82 | [0.78-0.87] | 0.022  | 0.76 | 0.78 | 0.76 |
|           |        | LDA   | 0.81 | [0.77-0.85] | 0.0221 | 0.76 | 0.79 | 0.74 |
|           |        | LR    | 0.82 | [0.78-0.87] | 0.0219 | 0.76 | 0.78 | 0.76 |
|           |        | NB    | 0.81 | [0.77-0.85] | 0.0215 | 0.74 | 0.78 | 0.71 |
|           |        | RF    | 0.79 | [0.74-0.83] | 0.0226 | 0.72 | 0.73 | 0.71 |
|           |        | AB    | 0.8  | [0.75-0.84] | 0.0221 | 0.73 | 0.77 | 0.7  |
|           |        | AE    | 0.81 | [0.76-0.85] | 0.022  | 0.74 | 0.78 | 0.71 |
|           | KW     | LASSO | 0.81 | [0.76-0.85] | 0.0221 | 0.74 | 0.76 | 0.73 |
| Center_06 |        | LDA   | 0.83 | [0.78-0.87] | 0.0216 | 0.77 | 0.78 | 0.76 |
|           |        | LR    | 0.82 | [0.77-0.86] | 0.0216 | 0.74 | 0.82 | 0.69 |
|           |        | NB    | 0.81 | [0.77-0.85] | 0.0216 | 0.73 | 0.84 | 0.65 |
|           |        | RF    | 0.8  | [0.76-0.84] | 0.0221 | 0.71 | 0.8  | 0.66 |
|           |        | AB    | 0.76 | [0.72-0.81] | 0.0241 | 0.69 | 0.86 | 0.58 |
|           |        | AE    | 0.76 | [0.71-0.8]  | 0.0253 | 0.71 | 0.75 | 0.69 |
|           | Relief | LASSO | 0.73 | [0.68-0.78] | 0.0255 | 0.68 | 0.76 | 0.63 |
|           |        | LDA   | 0.83 | [0.79-0.87] | 0.0206 | 0.76 | 0.78 | 0.75 |
|           |        | LR    | 0.74 | [0.7-0.79]  | 0.0251 | 0.7  | 0.72 | 0.68 |
|           |        | NB    | 0.62 | [0.56-0.68] | 0.0289 | 0.62 | 0.59 | 0.65 |
|           |        | RF    | 0.78 | [0.73-0.82] | 0.0233 | 0.72 | 0.77 | 0.69 |

|                  |        |       |      |             |        |      |      |      |
|------------------|--------|-------|------|-------------|--------|------|------|------|
|                  |        | AB    | 0.81 | [0.76-0.85] | 0.0227 | 0.75 | 0.84 | 0.69 |
|                  |        | AE    | 0.83 | [0.79-0.87] | 0.0203 | 0.76 | 0.81 | 0.74 |
|                  |        | LASSO | 0.85 | [0.81-0.89] | 0.0198 | 0.78 | 0.82 | 0.76 |
|                  | RFE    | LDA   | 0.82 | [0.77-0.86] | 0.022  | 0.75 | 0.8  | 0.72 |
|                  |        | LR    | 0.85 | [0.81-0.89] | 0.0198 | 0.78 | 0.83 | 0.75 |
|                  |        | NB    | 0.82 | [0.77-0.86] | 0.0217 | 0.76 | 0.79 | 0.74 |
|                  |        | RF    | 0.8  | [0.76-0.84] | 0.0217 | 0.71 | 0.76 | 0.69 |
|                  |        | AB    | 0.86 | [0.77-0.94] | 0.0438 | 0.8  | 0.85 | 0.8  |
|                  |        | AE    | 0.85 | [0.76-0.93] | 0.0439 | 0.8  | 0.81 | 0.8  |
|                  |        | LASSO | 0.84 | [0.74-0.93] | 0.0468 | 0.79 | 0.81 | 0.79 |
|                  | ANOVA  | LDA   | 0.85 | [0.74-0.93] | 0.0468 | 0.82 | 0.81 | 0.82 |
|                  |        | LR    | 0.86 | [0.77-0.93] | 0.0406 | 0.83 | 0.81 | 0.83 |
|                  |        | NB    | 0.82 | [0.73-0.91] | 0.0473 | 0.79 | 0.81 | 0.79 |
|                  |        | RF    | 0.86 | [0.77-0.93] | 0.0418 | 0.78 | 0.85 | 0.77 |
|                  |        | AB    | 0.86 | [0.77-0.94] | 0.046  | 0.83 | 0.85 | 0.83 |
|                  |        | AE    | 0.86 | [0.77-0.93] | 0.0384 | 0.64 | 0.96 | 0.63 |
|                  |        | LASSO | 0.83 | [0.72-0.93] | 0.0528 | 0.79 | 0.81 | 0.79 |
|                  | KW     | LDA   | 0.84 | [0.75-0.92] | 0.0461 | 0.79 | 0.81 | 0.79 |
|                  |        | LR    | 0.86 | [0.77-0.93] | 0.0415 | 0.84 | 0.81 | 0.84 |
|                  |        | NB    | 0.82 | [0.72-0.91] | 0.0485 | 0.79 | 0.81 | 0.79 |
|                  |        | RF    | 0.87 | [0.78-0.94] | 0.0414 | 0.77 | 0.88 | 0.76 |
| <b>Center_07</b> |        | AB    | 0.87 | [0.79-0.93] | 0.033  | 0.8  | 0.81 | 0.8  |
|                  |        | AE    | 0.85 | [0.77-0.93] | 0.0412 | 0.75 | 0.85 | 0.74 |
|                  |        | LASSO | 0.86 | [0.76-0.93] | 0.0442 | 0.8  | 0.81 | 0.8  |
|                  | Relief | LDA   | 0.86 | [0.77-0.93] | 0.04   | 0.8  | 0.81 | 0.8  |
|                  |        | LR    | 0.86 | [0.77-0.93] | 0.0395 | 0.79 | 0.81 | 0.79 |
|                  |        | NB    | 0.81 | [0.7-0.91]  | 0.0528 | 0.75 | 0.81 | 0.74 |
|                  |        | RF    | 0.87 | [0.79-0.93] | 0.0349 | 0.81 | 0.81 | 0.81 |
|                  |        | AB    | 0.87 | [0.77-0.95] | 0.0457 | 0.83 | 0.85 | 0.83 |
|                  |        | AE    | 0.86 | [0.77-0.93] | 0.0397 | 0.78 | 0.81 | 0.77 |
|                  |        | LASSO | 0.85 | [0.75-0.93] | 0.0453 | 0.78 | 0.81 | 0.78 |
|                  | RFE    | LDA   | 0.83 | [0.74-0.92] | 0.0466 | 0.73 | 0.85 | 0.72 |
|                  |        | LR    | 0.86 | [0.76-0.93] | 0.0416 | 0.85 | 0.77 | 0.86 |
|                  |        | NB    | 0.81 | [0.71-0.91] | 0.0514 | 0.77 | 0.81 | 0.76 |
|                  |        | RF    | 0.87 | [0.78-0.93] | 0.0402 | 0.8  | 0.81 | 0.8  |
|                  |        | AB    | 0.72 | [0.66-0.78] | 0.0282 | 0.67 | 0.7  | 0.66 |
|                  |        | AE    | 0.72 | [0.67-0.78] | 0.0293 | 0.68 | 0.69 | 0.67 |
|                  |        | LASSO | 0.73 | [0.67-0.79] | 0.0283 | 0.73 | 0.6  | 0.76 |
| <b>Center_08</b> | ANOVA  | LDA   | 0.73 | [0.67-0.78] | 0.0285 | 0.71 | 0.63 | 0.73 |
|                  |        | LR    | 0.73 | [0.68-0.79] | 0.0282 | 0.71 | 0.63 | 0.73 |
|                  |        | NB    | 0.69 | [0.63-0.75] | 0.0303 | 0.68 | 0.65 | 0.68 |

|  |        |       |      |             |        |      |      |      |
|--|--------|-------|------|-------------|--------|------|------|------|
|  |        | RF    | 0.73 | [0.67-0.78] | 0.0287 | 0.68 | 0.73 | 0.66 |
|  |        | AB    | 0.73 | [0.67-0.78] | 0.0269 | 0.66 | 0.69 | 0.65 |
|  |        | AE    | 0.74 | [0.68-0.79] | 0.0281 | 0.67 | 0.73 | 0.66 |
|  |        | LASSO | 0.73 | [0.68-0.79] | 0.028  | 0.79 | 0.54 | 0.85 |
|  | KW     | LDA   | 0.74 | [0.68-0.79] | 0.0274 | 0.68 | 0.7  | 0.67 |
|  |        | LR    | 0.72 | [0.67-0.78] | 0.0288 | 0.79 | 0.5  | 0.86 |
|  |        | NB    | 0.7  | [0.64-0.75] | 0.0298 | 0.73 | 0.59 | 0.76 |
|  |        | RF    | 0.72 | [0.67-0.78] | 0.029  | 0.65 | 0.74 | 0.63 |
|  |        | AB    | 0.73 | [0.67-0.78] | 0.0285 | 0.61 | 0.79 | 0.57 |
|  |        | AE    | 0.73 | [0.68-0.79] | 0.0272 | 0.67 | 0.75 | 0.65 |
|  |        | LASSO | 0.73 | [0.68-0.79] | 0.028  | 0.68 | 0.72 | 0.67 |
|  | Relief | LDA   | 0.74 | [0.69-0.79] | 0.0265 | 0.58 | 0.84 | 0.52 |
|  |        | LR    | 0.73 | [0.67-0.78] | 0.028  | 0.69 | 0.69 | 0.69 |
|  |        | NB    | 0.69 | [0.63-0.75] | 0.0307 | 0.76 | 0.55 | 0.8  |
|  |        | RF    | 0.72 | [0.66-0.77] | 0.0275 | 0.62 | 0.75 | 0.59 |
|  |        | AB    | 0.73 | [0.67-0.78] | 0.0282 | 0.69 | 0.69 | 0.69 |
|  |        | AE    | 0.75 | [0.69-0.8]  | 0.0264 | 0.69 | 0.7  | 0.69 |
|  |        | LASSO | 0.74 | [0.68-0.79] | 0.0282 | 0.79 | 0.52 | 0.86 |
|  | RFE    | LDA   | 0.71 | [0.65-0.77] | 0.029  | 0.59 | 0.76 | 0.56 |
|  |        | LR    | 0.72 | [0.66-0.77] | 0.029  | 0.67 | 0.7  | 0.67 |
|  |        | NB    | 0.69 | [0.62-0.75] | 0.0308 | 0.75 | 0.55 | 0.8  |
|  |        | RF    | 0.73 | [0.67-0.78] | 0.0275 | 0.62 | 0.79 | 0.58 |
|  |        | AB    | 0.75 | [0.6-0.87]  | 0.0692 | 0.76 | 0.72 | 0.76 |
|  |        | AE    | 0.78 | [0.63-0.9]  | 0.0677 | 0.81 | 0.72 | 0.82 |
|  |        | LASSO | 0.77 | [0.62-0.89] | 0.0702 | 0.74 | 0.78 | 0.74 |
|  | ANOVA  | LDA   | 0.78 | [0.63-0.9]  | 0.0669 | 0.82 | 0.72 | 0.82 |
|  |        | LR    | 0.76 | [0.61-0.88] | 0.0694 | 0.85 | 0.67 | 0.86 |
|  |        | NB    | 0.8  | [0.66-0.9]  | 0.0627 | 0.71 | 0.83 | 0.71 |
|  |        | RF    | 0.72 | [0.57-0.85] | 0.0733 | 0.68 | 0.72 | 0.68 |
|  |        | AB    | 0.77 | [0.66-0.87] | 0.0529 | 0.56 | 0.89 | 0.55 |
|  |        | AE    | 0.79 | [0.66-0.9]  | 0.0602 | 0.81 | 0.67 | 0.81 |
|  |        | LASSO | 0.78 | [0.62-0.91] | 0.0728 | 0.7  | 0.83 | 0.7  |
|  | KW     | LDA   | 0.83 | [0.73-0.92] | 0.0469 | 0.57 | 0.94 | 0.56 |
|  |        | LR    | 0.75 | [0.59-0.88] | 0.0745 | 0.87 | 0.67 | 0.87 |
|  |        | NB    | 0.77 | [0.64-0.89] | 0.0618 | 0.7  | 0.83 | 0.7  |
|  |        | RF    | 0.73 | [0.59-0.86] | 0.0717 | 0.86 | 0.56 | 0.87 |
|  |        | AB    | 0.75 | [0.61-0.87] | 0.0642 | 0.56 | 0.89 | 0.55 |
|  |        | AE    | 0.79 | [0.64-0.91] | 0.0648 | 0.72 | 0.78 | 0.72 |
|  |        | LASSO | 0.81 | [0.7-0.91]  | 0.0554 | 0.74 | 0.78 | 0.74 |
|  | Relief | LDA   | 0.83 | [0.74-0.92] | 0.0455 | 0.69 | 0.83 | 0.69 |
|  |        | LR    | 0.77 | [0.61-0.9]  | 0.0715 | 0.74 | 0.83 | 0.74 |

|                  |        |       |      |             |        |      |      |      |
|------------------|--------|-------|------|-------------|--------|------|------|------|
|                  |        | NB    | 0.71 | [0.56-0.83] | 0.0726 | 0.64 | 0.78 | 0.63 |
|                  |        | RF    | 0.74 | [0.59-0.86] | 0.0693 | 0.66 | 0.83 | 0.66 |
|                  |        | AB    | 0.77 | [0.64-0.88] | 0.0611 | 0.65 | 0.83 | 0.65 |
|                  |        | AE    | 0.79 | [0.65-0.9]  | 0.0629 | 0.62 | 0.89 | 0.61 |
|                  |        | LASSO | 0.79 | [0.65-0.91] | 0.0646 | 0.7  | 0.83 | 0.69 |
|                  | RFE    | LDA   | 0.84 | [0.74-0.92] | 0.0449 | 0.71 | 0.83 | 0.7  |
|                  |        | LR    | 0.77 | [0.64-0.89] | 0.0624 | 0.85 | 0.67 | 0.85 |
|                  |        | NB    | 0.74 | [0.58-0.87] | 0.0753 | 0.71 | 0.72 | 0.71 |
|                  |        | RF    | 0.76 | [0.63-0.87] | 0.0619 | 0.63 | 0.83 | 0.62 |
|                  |        | AB    | 0.74 | [0.68-0.79] | 0.0277 | 0.7  | 0.73 | 0.69 |
|                  |        | AE    | 0.71 | [0.65-0.77] | 0.0306 | 0.69 | 0.73 | 0.69 |
|                  |        | LASSO | 0.72 | [0.66-0.78] | 0.0305 | 0.7  | 0.7  | 0.7  |
|                  | ANOVA  | LDA   | 0.71 | [0.65-0.77] | 0.0302 | 0.69 | 0.73 | 0.69 |
|                  |        | LR    | 0.72 | [0.66-0.77] | 0.03   | 0.7  | 0.73 | 0.69 |
|                  |        | NB    | 0.69 | [0.63-0.75] | 0.0307 | 0.68 | 0.72 | 0.68 |
|                  |        | RF    | 0.75 | [0.7-0.8]   | 0.0266 | 0.7  | 0.72 | 0.7  |
|                  |        | AB    | 0.74 | [0.69-0.8]  | 0.0265 | 0.71 | 0.71 | 0.7  |
|                  |        | AE    | 0.73 | [0.67-0.78] | 0.0286 | 0.67 | 0.74 | 0.66 |
|                  |        | LASSO | 0.72 | [0.66-0.77] | 0.03   | 0.69 | 0.7  | 0.69 |
|                  | KW     | LDA   | 0.71 | [0.65-0.77] | 0.0299 | 0.68 | 0.74 | 0.67 |
|                  |        | LR    | 0.72 | [0.66-0.77] | 0.0299 | 0.7  | 0.71 | 0.7  |
|                  |        | NB    | 0.69 | [0.63-0.75] | 0.0309 | 0.68 | 0.69 | 0.68 |
|                  |        | RF    | 0.74 | [0.68-0.79] | 0.0269 | 0.67 | 0.72 | 0.66 |
| <b>Center_10</b> |        | AB    | 0.72 | [0.67-0.78] | 0.0284 | 0.67 | 0.7  | 0.67 |
|                  |        | AE    | 0.73 | [0.67-0.78] | 0.0289 | 0.67 | 0.75 | 0.66 |
|                  |        | LASSO | 0.72 | [0.66-0.78] | 0.0302 | 0.69 | 0.72 | 0.69 |
|                  | Relief | LDA   | 0.72 | [0.66-0.78] | 0.0287 | 0.69 | 0.7  | 0.69 |
|                  |        | LR    | 0.72 | [0.66-0.77] | 0.03   | 0.7  | 0.72 | 0.7  |
|                  |        | NB    | 0.68 | [0.62-0.74] | 0.0307 | 0.66 | 0.72 | 0.65 |
|                  |        | RF    | 0.75 | [0.69-0.8]  | 0.0277 | 0.66 | 0.75 | 0.64 |
|                  |        | AB    | 0.74 | [0.69-0.79] | 0.0266 | 0.67 | 0.73 | 0.66 |
|                  |        | AE    | 0.73 | [0.67-0.78] | 0.0293 | 0.69 | 0.72 | 0.69 |
|                  |        | LASSO | 0.71 | [0.65-0.77] | 0.0302 | 0.69 | 0.7  | 0.69 |
|                  | RFE    | LDA   | 0.71 | [0.65-0.77] | 0.0303 | 0.68 | 0.7  | 0.67 |
|                  |        | LR    | 0.72 | [0.66-0.77] | 0.0301 | 0.7  | 0.71 | 0.7  |
|                  |        | NB    | 0.68 | [0.62-0.74] | 0.0307 | 0.66 | 0.74 | 0.64 |
|                  |        | RF    | 0.74 | [0.69-0.79] | 0.0276 | 0.65 | 0.75 | 0.63 |
|                  |        | AB    | 0.82 | [0.78-0.86] | 0.0208 | 0.75 | 0.77 | 0.75 |
|                  |        | AE    | 0.84 | [0.79-0.88] | 0.0209 | 0.76 | 0.81 | 0.75 |
| <b>Center_11</b> | ANOVA  | LASSO | 0.85 | [0.8-0.88]  | 0.0194 | 0.76 | 0.81 | 0.75 |
|                  |        | LDA   | 0.83 | [0.79-0.86] | 0.0203 | 0.75 | 0.79 | 0.74 |

|        |       |      |             |        |      |      |      |
|--------|-------|------|-------------|--------|------|------|------|
|        | LR    | 0.83 | [0.79-0.87] | 0.0206 | 0.77 | 0.77 | 0.76 |
|        | NB    | 0.81 | [0.77-0.85] | 0.0198 | 0.73 | 0.79 | 0.72 |
|        | RF    | 0.82 | [0.77-0.86] | 0.0213 | 0.74 | 0.79 | 0.74 |
|        | AB    | 0.82 | [0.78-0.86] | 0.0205 | 0.73 | 0.79 | 0.72 |
|        | AE    | 0.84 | [0.8-0.87]  | 0.0196 | 0.75 | 0.83 | 0.74 |
|        | LASSO | 0.85 | [0.8-0.88]  | 0.0193 | 0.74 | 0.83 | 0.73 |
| KW     | LDA   | 0.83 | [0.78-0.86] | 0.0205 | 0.7  | 0.85 | 0.68 |
|        | LR    | 0.83 | [0.79-0.86] | 0.0201 | 0.76 | 0.78 | 0.76 |
|        | NB    | 0.81 | [0.77-0.85] | 0.0199 | 0.73 | 0.79 | 0.72 |
|        | RF    | 0.82 | [0.77-0.85] | 0.0211 | 0.75 | 0.77 | 0.75 |
|        | AB    | 0.82 | [0.77-0.85] | 0.0207 | 0.71 | 0.83 | 0.69 |
|        | AE    | 0.84 | [0.8-0.88]  | 0.0202 | 0.77 | 0.81 | 0.76 |
|        | LASSO | 0.85 | [0.81-0.88] | 0.0196 | 0.76 | 0.82 | 0.76 |
| Relief | LDA   | 0.84 | [0.8-0.87]  | 0.0193 | 0.74 | 0.83 | 0.73 |
|        | LR    | 0.83 | [0.78-0.87] | 0.0203 | 0.74 | 0.78 | 0.74 |
|        | NB    | 0.79 | [0.75-0.83] | 0.0212 | 0.7  | 0.79 | 0.68 |
|        | RF    | 0.81 | [0.76-0.85] | 0.0224 | 0.7  | 0.85 | 0.68 |
|        | AB    | 0.83 | [0.78-0.86] | 0.0196 | 0.76 | 0.77 | 0.76 |
|        | AE    | 0.84 | [0.8-0.88]  | 0.0201 | 0.74 | 0.85 | 0.73 |
|        | LASSO | 0.84 | [0.8-0.88]  | 0.0199 | 0.75 | 0.82 | 0.74 |
| RFE    | LDA   | 0.83 | [0.79-0.87] | 0.0204 | 0.75 | 0.81 | 0.74 |
|        | LR    | 0.82 | [0.78-0.86] | 0.0202 | 0.72 | 0.82 | 0.7  |
|        | NB    | 0.8  | [0.76-0.84] | 0.0211 | 0.73 | 0.78 | 0.72 |
|        | RF    | 0.82 | [0.77-0.86] | 0.0211 | 0.71 | 0.83 | 0.69 |
|        | AB    | 0.81 | [0.77-0.86] | 0.0234 | 0.75 | 0.75 | 0.75 |
|        | AE    | 0.83 | [0.79-0.87] | 0.0216 | 0.78 | 0.78 | 0.78 |
|        | LASSO | 0.82 | [0.78-0.86] | 0.0222 | 0.72 | 0.82 | 0.7  |
| ANOVA  | LDA   | 0.82 | [0.77-0.86] | 0.023  | 0.72 | 0.81 | 0.71 |
|        | LR    | 0.82 | [0.78-0.86] | 0.0222 | 0.72 | 0.85 | 0.7  |
|        | NB    | 0.81 | [0.76-0.85] | 0.0227 | 0.76 | 0.76 | 0.76 |
|        | RF    | 0.81 | [0.76-0.85] | 0.0229 | 0.73 | 0.77 | 0.73 |
|        | AB    | 0.82 | [0.78-0.87] | 0.023  | 0.76 | 0.77 | 0.75 |
|        | AE    | 0.82 | [0.78-0.86] | 0.0217 | 0.66 | 0.9  | 0.63 |
|        | LASSO | 0.82 | [0.78-0.86] | 0.0227 | 0.7  | 0.83 | 0.68 |
| KW     | LDA   | 0.81 | [0.77-0.86] | 0.0232 | 0.72 | 0.8  | 0.71 |
|        | LR    | 0.83 | [0.78-0.87] | 0.0219 | 0.71 | 0.85 | 0.69 |
|        | NB    | 0.81 | [0.76-0.85] | 0.0224 | 0.76 | 0.76 | 0.76 |
|        | RF    | 0.81 | [0.76-0.85] | 0.0227 | 0.72 | 0.78 | 0.71 |
|        | AB    | 0.82 | [0.77-0.86] | 0.0237 | 0.74 | 0.81 | 0.73 |
|        | AE    | 0.82 | [0.78-0.87] | 0.0219 | 0.71 | 0.86 | 0.69 |
| Relief | LASSO | 0.82 | [0.78-0.86] | 0.0224 | 0.71 | 0.85 | 0.69 |

**Center\_12**

|                  |        |       |      |             |        |      |      |      |
|------------------|--------|-------|------|-------------|--------|------|------|------|
|                  |        | LDA   | 0.82 | [0.78-0.86] | 0.0226 | 0.67 | 0.86 | 0.64 |
|                  |        | LR    | 0.83 | [0.78-0.87] | 0.0218 | 0.71 | 0.85 | 0.69 |
|                  |        | NB    | 0.8  | [0.75-0.85] | 0.0238 | 0.72 | 0.79 | 0.71 |
|                  |        | RF    | 0.81 | [0.76-0.85] | 0.0237 | 0.71 | 0.81 | 0.69 |
|                  |        | AB    | 0.82 | [0.77-0.86] | 0.0223 | 0.7  | 0.8  | 0.69 |
|                  |        | AE    | 0.83 | [0.78-0.87] | 0.0227 | 0.71 | 0.84 | 0.69 |
|                  |        | LASSO | 0.82 | [0.78-0.86] | 0.0224 | 0.69 | 0.87 | 0.67 |
|                  | RFE    | LDA   | 0.82 | [0.77-0.86] | 0.023  | 0.72 | 0.81 | 0.71 |
|                  |        | LR    | 0.83 | [0.78-0.87] | 0.0219 | 0.71 | 0.85 | 0.69 |
|                  |        | NB    | 0.81 | [0.76-0.85] | 0.0231 | 0.72 | 0.78 | 0.71 |
|                  |        | RF    | 0.82 | [0.77-0.86] | 0.0226 | 0.75 | 0.76 | 0.75 |
|                  |        | AB    | 0.85 | [0.8-0.89]  | 0.0217 | 0.78 | 0.79 | 0.78 |
|                  |        | AE    | 0.86 | [0.82-0.89] | 0.019  | 0.8  | 0.79 | 0.8  |
|                  |        | LASSO | 0.86 | [0.82-0.9]  | 0.0199 | 0.78 | 0.81 | 0.78 |
|                  | ANOVA  | LDA   | 0.86 | [0.83-0.9]  | 0.0192 | 0.8  | 0.81 | 0.8  |
|                  |        | LR    | 0.86 | [0.83-0.9]  | 0.0185 | 0.8  | 0.8  | 0.8  |
|                  |        | NB    | 0.83 | [0.78-0.87] | 0.023  | 0.74 | 0.8  | 0.73 |
|                  |        | RF    | 0.83 | [0.79-0.88] | 0.0222 | 0.74 | 0.78 | 0.74 |
|                  |        | AB    | 0.84 | [0.8-0.89]  | 0.0215 | 0.74 | 0.82 | 0.74 |
|                  |        | AE    | 0.86 | [0.82-0.9]  | 0.0192 | 0.73 | 0.87 | 0.72 |
|                  |        | LASSO | 0.87 | [0.84-0.9]  | 0.0175 | 0.76 | 0.84 | 0.75 |
|                  | KW     | LDA   | 0.86 | [0.83-0.9]  | 0.0185 | 0.75 | 0.87 | 0.74 |
|                  |        | LR    | 0.86 | [0.83-0.9]  | 0.0183 | 0.77 | 0.83 | 0.76 |
|                  |        | NB    | 0.83 | [0.78-0.87] | 0.0229 | 0.75 | 0.78 | 0.74 |
|                  |        | RF    | 0.84 | [0.79-0.88] | 0.0216 | 0.75 | 0.79 | 0.75 |
| <b>Center_13</b> |        | AB    | 0.84 | [0.8-0.89]  | 0.022  | 0.78 | 0.8  | 0.77 |
|                  |        | AE    | 0.86 | [0.82-0.89] | 0.0189 | 0.74 | 0.86 | 0.72 |
|                  |        | LASSO | 0.87 | [0.83-0.9]  | 0.0176 | 0.77 | 0.83 | 0.76 |
|                  | Relief | LDA   | 0.86 | [0.82-0.9]  | 0.0185 | 0.79 | 0.8  | 0.79 |
|                  |        | LR    | 0.86 | [0.83-0.9]  | 0.0186 | 0.79 | 0.8  | 0.79 |
|                  |        | NB    | 0.8  | [0.75-0.85] | 0.0245 | 0.7  | 0.79 | 0.69 |
|                  |        | RF    | 0.84 | [0.79-0.88] | 0.0216 | 0.74 | 0.83 | 0.73 |
|                  |        | AB    | 0.84 | [0.8-0.89]  | 0.0233 | 0.76 | 0.8  | 0.76 |
|                  |        | AE    | 0.86 | [0.82-0.89] | 0.0192 | 0.7  | 0.87 | 0.68 |
|                  |        | LASSO | 0.86 | [0.83-0.9]  | 0.0189 | 0.76 | 0.84 | 0.75 |
|                  | RFE    | LDA   | 0.87 | [0.83-0.9]  | 0.0171 | 0.77 | 0.83 | 0.77 |
|                  |        | LR    | 0.86 | [0.83-0.9]  | 0.0186 | 0.79 | 0.8  | 0.79 |
|                  |        | NB    | 0.83 | [0.78-0.87] | 0.0231 | 0.74 | 0.78 | 0.74 |
|                  |        | RF    | 0.83 | [0.79-0.87] | 0.0215 | 0.75 | 0.77 | 0.75 |
| <b>Center_14</b> | ANOVA  | AB    | 0.84 | [0.8-0.88]  | 0.0209 | 0.77 | 0.82 | 0.76 |
|                  |        | AE    | 0.86 | [0.81-0.89] | 0.0199 | 0.79 | 0.81 | 0.79 |

|           |       |      |             |        |      |      |      |
|-----------|-------|------|-------------|--------|------|------|------|
|           | LASSO | 0.84 | [0.79-0.89] | 0.0225 | 0.8  | 0.8  | 0.8  |
|           | LDA   | 0.85 | [0.8-0.89]  | 0.0202 | 0.79 | 0.81 | 0.79 |
|           | LR    | 0.85 | [0.81-0.89] | 0.0221 | 0.81 | 0.8  | 0.81 |
|           | NB    | 0.82 | [0.78-0.87] | 0.0243 | 0.81 | 0.76 | 0.81 |
|           | RF    | 0.86 | [0.82-0.89] | 0.0174 | 0.79 | 0.8  | 0.79 |
|           | AB    | 0.84 | [0.8-0.88]  | 0.0192 | 0.72 | 0.83 | 0.71 |
|           | AE    | 0.85 | [0.81-0.89] | 0.0212 | 0.8  | 0.8  | 0.8  |
| KW        | LASSO | 0.84 | [0.79-0.88] | 0.0225 | 0.79 | 0.79 | 0.79 |
|           | LDA   | 0.84 | [0.8-0.88]  | 0.0216 | 0.78 | 0.81 | 0.78 |
|           | LR    | 0.85 | [0.8-0.89]  | 0.0224 | 0.81 | 0.81 | 0.81 |
|           | NB    | 0.83 | [0.78-0.87] | 0.0237 | 0.85 | 0.71 | 0.87 |
|           | RF    | 0.86 | [0.82-0.9]  | 0.0179 | 0.75 | 0.86 | 0.74 |
|           | AB    | 0.84 | [0.8-0.88]  | 0.0204 | 0.68 | 0.88 | 0.66 |
|           | AE    | 0.85 | [0.81-0.89] | 0.0211 | 0.78 | 0.81 | 0.78 |
| Relief    | LASSO | 0.83 | [0.79-0.88] | 0.0235 | 0.79 | 0.79 | 0.79 |
|           | LDA   | 0.85 | [0.8-0.89]  | 0.0214 | 0.81 | 0.84 | 0.8  |
|           | LR    | 0.84 | [0.79-0.89] | 0.0231 | 0.75 | 0.84 | 0.74 |
|           | NB    | 0.8  | [0.75-0.86] | 0.0256 | 0.74 | 0.76 | 0.74 |
|           | RF    | 0.86 | [0.83-0.89] | 0.0177 | 0.8  | 0.82 | 0.8  |
|           | AB    | 0.84 | [0.79-0.88] | 0.0221 | 0.75 | 0.85 | 0.74 |
|           | AE    | 0.85 | [0.8-0.89]  | 0.021  | 0.78 | 0.83 | 0.78 |
| RFE       | LASSO | 0.83 | [0.78-0.87] | 0.0234 | 0.74 | 0.81 | 0.73 |
|           | LDA   | 0.84 | [0.8-0.88]  | 0.0212 | 0.79 | 0.8  | 0.78 |
|           | LR    | 0.84 | [0.8-0.89]  | 0.0227 | 0.79 | 0.8  | 0.79 |
|           | NB    | 0.79 | [0.73-0.84] | 0.0266 | 0.69 | 0.79 | 0.68 |
|           | RF    | 0.85 | [0.81-0.89] | 0.0193 | 0.79 | 0.82 | 0.78 |
|           | AB    | 0.73 | [0.57-0.86] | 0.0719 | 0.69 | 0.8  | 0.69 |
|           | AE    | 0.76 | [0.63-0.88] | 0.0627 | 0.71 | 0.8  | 0.71 |
| ANOVA     | LASSO | 0.71 | [0.56-0.84] | 0.0697 | 0.62 | 0.8  | 0.62 |
|           | LDA   | 0.69 | [0.5-0.86]  | 0.0912 | 0.69 | 0.7  | 0.69 |
|           | LR    | 0.72 | [0.57-0.85] | 0.0691 | 0.63 | 0.8  | 0.63 |
|           | NB    | 0.69 | [0.55-0.82] | 0.0671 | 0.77 | 0.6  | 0.78 |
|           | RF    | 0.74 | [0.62-0.86] | 0.061  | 0.67 | 0.8  | 0.67 |
| Center_15 | AB    | 0.75 | [0.59-0.87] | 0.0667 | 0.7  | 0.8  | 0.7  |
|           | AE    | 0.77 | [0.65-0.88] | 0.0569 | 0.52 | 1    | 0.52 |
|           | LASSO | 0.72 | [0.58-0.86] | 0.0721 | 0.53 | 0.9  | 0.53 |
| KW        | LDA   | 0.68 | [0.48-0.85] | 0.0906 | 0.67 | 0.7  | 0.67 |
|           | LR    | 0.73 | [0.58-0.86] | 0.0707 | 0.58 | 0.9  | 0.57 |
|           | NB    | 0.69 | [0.56-0.82] | 0.0669 | 0.77 | 0.6  | 0.77 |
|           | RF    | 0.73 | [0.6-0.85]  | 0.0603 | 0.57 | 0.9  | 0.57 |
| Relief    | AB    | 0.75 | [0.61-0.86] | 0.0612 | 0.76 | 0.8  | 0.76 |

|           |        |       |      |             |        |      |      |      |
|-----------|--------|-------|------|-------------|--------|------|------|------|
|           |        | AE    | 0.73 | [0.57-0.87] | 0.0731 | 0.54 | 0.9  | 0.54 |
|           |        | LASSO | 0.72 | [0.58-0.85] | 0.0677 | 0.61 | 0.8  | 0.61 |
|           |        | LDA   | 0.72 | [0.55-0.86] | 0.0812 | 0.6  | 0.9  | 0.6  |
|           |        | LR    | 0.74 | [0.6-0.87]  | 0.0692 | 0.57 | 0.9  | 0.56 |
|           |        | NB    | 0.7  | [0.56-0.83] | 0.0668 | 0.7  | 0.7  | 0.7  |
|           |        | RF    | 0.73 | [0.61-0.84] | 0.0584 | 0.54 | 0.9  | 0.54 |
|           |        | AB    | 0.76 | [0.64-0.85] | 0.0543 | 0.72 | 0.8  | 0.72 |
|           |        | AE    | 0.74 | [0.63-0.84] | 0.0546 | 0.59 | 0.9  | 0.59 |
|           | RFE    | LASSO | 0.69 | [0.55-0.82] | 0.0676 | 0.54 | 0.9  | 0.54 |
|           |        | LDA   | 0.66 | [0.48-0.81] | 0.0832 | 0.56 | 0.8  | 0.56 |
|           |        | LR    | 0.72 | [0.58-0.85] | 0.0699 | 0.56 | 0.9  | 0.55 |
|           |        | NB    | 0.68 | [0.54-0.82] | 0.0678 | 0.75 | 0.6  | 0.75 |
|           |        | RF    | 0.74 | [0.65-0.84] | 0.0486 | 0.6  | 1    | 0.6  |
|           |        | AB    | 0.7  | [0.65-0.75] | 0.0254 | 0.71 | 0.65 | 0.72 |
|           |        | AE    | 0.73 | [0.69-0.78] | 0.0224 | 0.73 | 0.67 | 0.74 |
|           |        | LASSO | 0.72 | [0.67-0.77] | 0.0241 | 0.71 | 0.67 | 0.72 |
|           | ANOVA  | LDA   | 0.72 | [0.67-0.76] | 0.0228 | 0.69 | 0.67 | 0.69 |
|           |        | LR    | 0.71 | [0.66-0.76] | 0.0247 | 0.67 | 0.68 | 0.67 |
|           |        | NB    | 0.68 | [0.63-0.73] | 0.026  | 0.69 | 0.61 | 0.71 |
|           |        | RF    | 0.77 | [0.73-0.81] | 0.0221 | 0.71 | 0.73 | 0.71 |
|           |        | AB    | 0.67 | [0.63-0.72] | 0.0247 | 0.86 | 0.39 | 0.92 |
|           |        | AE    | 0.72 | [0.67-0.77] | 0.0243 | 0.77 | 0.59 | 0.8  |
|           |        | LASSO | 0.71 | [0.66-0.76] | 0.0247 | 0.84 | 0.48 | 0.89 |
|           | KW     | LDA   | 0.71 | [0.66-0.76] | 0.0244 | 0.85 | 0.48 | 0.9  |
|           |        | LR    | 0.71 | [0.66-0.76] | 0.0249 | 0.84 | 0.53 | 0.88 |
|           |        | NB    | 0.7  | [0.65-0.75] | 0.0251 | 0.73 | 0.61 | 0.75 |
|           |        | RF    | 0.74 | [0.7-0.78]  | 0.0208 | 0.67 | 0.73 | 0.66 |
| Center_16 |        | AB    | 0.67 | [0.62-0.72] | 0.0244 | 0.65 | 0.65 | 0.65 |
|           |        | AE    | 0.72 | [0.67-0.77] | 0.0247 | 0.8  | 0.58 | 0.83 |
|           |        | LASSO | 0.71 | [0.66-0.76] | 0.0243 | 0.85 | 0.46 | 0.91 |
|           | Relief | LDA   | 0.71 | [0.66-0.76] | 0.0247 | 0.78 | 0.57 | 0.81 |
|           |        | LR    | 0.71 | [0.66-0.76] | 0.0249 | 0.83 | 0.55 | 0.87 |
|           |        | NB    | 0.7  | [0.65-0.75] | 0.025  | 0.82 | 0.52 | 0.87 |
|           |        | RF    | 0.75 | [0.7-0.79]  | 0.02   | 0.68 | 0.7  | 0.68 |
|           |        | AB    | 0.68 | [0.63-0.73] | 0.024  | 0.61 | 0.69 | 0.6  |
|           |        | AE    | 0.73 | [0.68-0.77] | 0.0235 | 0.83 | 0.52 | 0.87 |
|           |        | LASSO | 0.71 | [0.66-0.76] | 0.0245 | 0.8  | 0.54 | 0.84 |
|           | RFE    | LDA   | 0.71 | [0.66-0.76] | 0.0245 | 0.8  | 0.54 | 0.84 |
|           |        | LR    | 0.71 | [0.67-0.76] | 0.0248 | 0.76 | 0.63 | 0.77 |
|           |        | NB    | 0.69 | [0.64-0.74] | 0.0249 | 0.75 | 0.6  | 0.78 |
|           |        | RF    | 0.74 | [0.7-0.78]  | 0.0211 | 0.69 | 0.7  | 0.69 |



|                  |        |       |             |             |        |      |      |      |
|------------------|--------|-------|-------------|-------------|--------|------|------|------|
| <b>Center_17</b> | ANOVA  | AB    | 0.69        | [0.65-0.74] | 0.025  | 0.74 | 0.6  | 0.76 |
|                  |        | AE    | 0.7         | [0.65-0.75] | 0.0254 | 0.76 | 0.6  | 0.79 |
|                  |        | LASSO | 0.7         | [0.65-0.75] | 0.0251 | 0.74 | 0.6  | 0.77 |
|                  |        | LDA   | 0.71        | [0.66-0.76] | 0.0241 | 0.8  | 0.57 | 0.83 |
|                  |        | LR    | 0.7         | [0.66-0.75] | 0.0253 | 0.76 | 0.6  | 0.78 |
|                  |        | NB    | 0.7         | [0.65-0.75] | 0.0252 | 0.76 | 0.6  | 0.78 |
|                  |        | RF    | 0.77        | [0.72-0.81] | 0.0223 | 0.79 | 0.65 | 0.81 |
|                  | KW     | AB    | 0.67        | [0.63-0.72] | 0.0247 | 0.86 | 0.39 | 0.92 |
|                  |        | AE    | 0.72        | [0.67-0.77] | 0.0243 | 0.77 | 0.59 | 0.8  |
|                  |        | LASSO | 0.71        | [0.66-0.76] | 0.0247 | 0.84 | 0.48 | 0.89 |
|                  |        | LDA   | 0.71        | [0.66-0.76] | 0.0244 | 0.85 | 0.48 | 0.9  |
|                  |        | LR    | 0.71        | [0.66-0.76] | 0.0249 | 0.84 | 0.53 | 0.88 |
|                  |        | NB    | 0.7         | [0.65-0.75] | 0.0251 | 0.73 | 0.61 | 0.75 |
|                  |        | RF    | 0.74        | [0.7-0.78]  | 0.0208 | 0.67 | 0.73 | 0.66 |
|                  | Relief | AB    | 0.67        | [0.62-0.72] | 0.0244 | 0.65 | 0.65 | 0.65 |
|                  |        | AE    | 0.72        | [0.67-0.77] | 0.0247 | 0.8  | 0.58 | 0.83 |
|                  |        | LASSO | 0.71        | [0.66-0.76] | 0.0243 | 0.85 | 0.46 | 0.91 |
|                  |        | LDA   | 0.71        | [0.66-0.76] | 0.0247 | 0.78 | 0.57 | 0.81 |
|                  |        | LR    | 0.71        | [0.66-0.76] | 0.0249 | 0.83 | 0.55 | 0.87 |
|                  |        | NB    | 0.7         | [0.65-0.75] | 0.025  | 0.82 | 0.52 | 0.87 |
|                  |        | RF    | 0.75        | [0.7-0.79]  | 0.02   | 0.68 | 0.7  | 0.68 |
| RFE              | AB     | 0.68  | [0.63-0.73] | 0.024       | 0.61   | 0.69 | 0.6  |      |
|                  | AE     | 0.73  | [0.68-0.77] | 0.0235      | 0.83   | 0.52 | 0.87 |      |
|                  | LASSO  | 0.71  | [0.66-0.76] | 0.0245      | 0.8    | 0.54 | 0.84 |      |
|                  | LDA    | 0.71  | [0.66-0.76] | 0.0245      | 0.8    | 0.54 | 0.84 |      |
|                  | LR     | 0.71  | [0.67-0.76] | 0.0248      | 0.76   | 0.63 | 0.77 |      |
|                  | NB     | 0.69  | [0.64-0.74] | 0.0249      | 0.75   | 0.6  | 0.78 |      |
|                  | RF     | 0.74  | [0.7-0.78]  | 0.0211      | 0.69   | 0.7  | 0.69 |      |
| <b>Center_18</b> | ANOVA  | AB    | 0.92        | [0.87-0.96] | 0.0232 | 0.83 | 0.91 | 0.83 |
|                  |        | AE    | 0.91        | [0.85-0.96] | 0.0274 | 0.85 | 0.91 | 0.85 |
|                  |        | LASSO | 0.92        | [0.85-0.97] | 0.0298 | 0.86 | 0.85 | 0.86 |
|                  |        | LDA   | 0.88        | [0.81-0.94] | 0.0338 | 0.79 | 0.85 | 0.79 |
|                  |        | LR    | 0.92        | [0.85-0.97] | 0.0295 | 0.83 | 0.91 | 0.83 |
|                  |        | NB    | 0.9         | [0.84-0.96] | 0.0287 | 0.89 | 0.82 | 0.89 |
|                  |        | RF    | 0.69        | [0.57-0.8]  | 0.0562 | 0.63 | 0.71 | 0.63 |
|                  | KW     | AB    | 0.92        | [0.87-0.96] | 0.0235 | 0.83 | 0.88 | 0.82 |
|                  |        | AE    | 0.92        | [0.86-0.96] | 0.0257 | 0.88 | 0.88 | 0.88 |
|                  |        | LASSO | 0.91        | [0.85-0.96] | 0.0293 | 0.84 | 0.85 | 0.84 |
|                  |        | LDA   | 0.89        | [0.83-0.94] | 0.0303 | 0.77 | 0.91 | 0.77 |
|                  |        | LR    | 0.92        | [0.86-0.97] | 0.0292 | 0.83 | 0.91 | 0.83 |
|                  |        | NB    | 0.9         | [0.83-0.96] | 0.0342 | 0.91 | 0.79 | 0.92 |

|                  |        |       |             |             |        |      |      |      |
|------------------|--------|-------|-------------|-------------|--------|------|------|------|
| <b>Center_19</b> | Relief | RF    | 0.72        | [0.61-0.83] | 0.0559 | 0.77 | 0.62 | 0.78 |
|                  |        | AB    | 0.94        | [0.9-0.97]  | 0.0181 | 0.84 | 0.91 | 0.84 |
|                  |        | AE    | 0.91        | [0.85-0.95] | 0.0252 | 0.82 | 0.91 | 0.82 |
|                  |        | LASSO | 0.91        | [0.84-0.96] | 0.0304 | 0.83 | 0.88 | 0.83 |
|                  |        | LDA   | 0.88        | [0.82-0.93] | 0.0288 | 0.78 | 0.88 | 0.78 |
|                  |        | LR    | 0.89        | [0.84-0.94] | 0.0269 | 0.84 | 0.85 | 0.84 |
|                  |        | NB    | 0.87        | [0.8-0.94]  | 0.0357 | 0.82 | 0.85 | 0.82 |
|                  |        | RF    | 0.71        | [0.59-0.83] | 0.0593 | 0.93 | 0.47 | 0.94 |
|                  | RFE    | AB    | 0.91        | [0.84-0.96] | 0.0283 | 0.82 | 0.88 | 0.82 |
|                  |        | AE    | 0.93        | [0.87-0.97] | 0.0278 | 0.86 | 0.91 | 0.86 |
|                  |        | LASSO | 0.9         | [0.82-0.96] | 0.035  | 0.81 | 0.91 | 0.8  |
|                  |        | LDA   | 0.89        | [0.82-0.95] | 0.0347 | 0.84 | 0.85 | 0.84 |
|                  |        | LR    | 0.92        | [0.85-0.97] | 0.0303 | 0.85 | 0.91 | 0.85 |
|                  |        | NB    | 0.86        | [0.78-0.92] | 0.0369 | 0.82 | 0.82 | 0.82 |
|                  |        | RF    | 0.73        | [0.63-0.83] | 0.0502 | 0.78 | 0.65 | 0.79 |
|                  | ANOVA  | AB    | 0.69        | [0.62-0.76] | 0.032  | 0.67 | 0.69 | 0.67 |
|                  |        | AE    | 0.71        | [0.65-0.77] | 0.029  | 0.69 | 0.7  | 0.69 |
|                  |        | LASSO | 0.71        | [0.65-0.77] | 0.0296 | 0.65 | 0.69 | 0.65 |
|                  |        | LDA   | 0.72        | [0.66-0.78] | 0.0284 | 0.66 | 0.7  | 0.66 |
|                  |        | LR    | 0.72        | [0.66-0.77] | 0.0297 | 0.73 | 0.62 | 0.74 |
|                  |        | NB    | 0.69        | [0.63-0.76] | 0.031  | 0.66 | 0.68 | 0.65 |
|                  |        | RF    | 0.67        | [0.62-0.73] | 0.0298 | 0.61 | 0.7  | 0.6  |
|                  | KW     | AB    | 0.71        | [0.66-0.76] | 0.0277 | 0.69 | 0.63 | 0.7  |
|                  |        | AE    | 0.71        | [0.65-0.76] | 0.0282 | 0.66 | 0.75 | 0.65 |
|                  |        | LASSO | 0.7         | [0.64-0.76] | 0.0302 | 0.64 | 0.72 | 0.63 |
|                  |        | LDA   | 0.71        | [0.65-0.77] | 0.0304 | 0.65 | 0.71 | 0.65 |
|                  |        | LR    | 0.71        | [0.65-0.77] | 0.0301 | 0.67 | 0.7  | 0.66 |
|                  |        | NB    | 0.69        | [0.63-0.75] | 0.0316 | 0.66 | 0.68 | 0.66 |
| RF               |        | 0.7   | [0.64-0.76] | 0.0293      | 0.62   | 0.69 | 0.62 |      |
| Relief           | AB     | 0.72  | [0.67-0.78] | 0.0276      | 0.59   | 0.77 | 0.57 |      |
|                  | AE     | 0.72  | [0.67-0.77] | 0.0273      | 0.62   | 0.72 | 0.62 |      |
|                  | LASSO  | 0.72  | [0.66-0.77] | 0.0285      | 0.53   | 0.83 | 0.52 |      |
|                  | LDA    | 0.72  | [0.66-0.78] | 0.0296      | 0.56   | 0.82 | 0.54 |      |
|                  | LR     | 0.72  | [0.67-0.78] | 0.0284      | 0.57   | 0.8  | 0.56 |      |
|                  | NB     | 0.63  | [0.57-0.7]  | 0.033       | 0.62   | 0.66 | 0.62 |      |
|                  | RF     | 0.71  | [0.65-0.76] | 0.0295      | 0.65   | 0.7  | 0.64 |      |
| RFE              | AB     | 0.72  | [0.66-0.78] | 0.0296      | 0.68   | 0.71 | 0.68 |      |
|                  | AE     | 0.72  | [0.67-0.78] | 0.0266      | 0.67   | 0.7  | 0.67 |      |
|                  | LASSO  | 0.72  | [0.66-0.77] | 0.0294      | 0.68   | 0.69 | 0.68 |      |
|                  | LDA    | 0.71  | [0.65-0.77] | 0.0299      | 0.7    | 0.7  | 0.69 |      |
|                  | LR     | 0.71  | [0.65-0.77] | 0.0303      | 0.64   | 0.72 | 0.64 |      |

---

|    |      |             |        |      |      |      |
|----|------|-------------|--------|------|------|------|
| NB | 0.69 | [0.63-0.76] | 0.031  | 0.66 | 0.68 | 0.66 |
| RF | 0.7  | [0.64-0.75] | 0.0279 | 0.58 | 0.75 | 0.57 |

---

**Supplemental Table 14.** Classification performance indices of different feature selector and classifiers in Strategy 10 [for each center-](#)

| Center    | FS     | Classifier | AUC         | 95% CIs     | Std    | Acc  | Sen  | Spe  |
|-----------|--------|------------|-------------|-------------|--------|------|------|------|
| Center_01 | ANOVA  | AB         | 0.56        | [0.39-0.75] | 0.0927 | 0.58 | 0.64 | 0.55 |
|           |        | AE         | 0.66        | [0.46-0.83] | 0.0946 | 0.73 | 0.79 | 0.71 |
|           |        | LASSO      | 0.68        | [0.51-0.84] | 0.0892 | 0.71 | 0.71 | 0.71 |
|           |        | LDA        | 0.61        | [0.41-0.8]  | 0.1    | 0.67 | 0.64 | 0.68 |
|           |        | LR         | 0.66        | [0.5-0.83]  | 0.0879 | 0.71 | 0.64 | 0.74 |
|           |        | NB         | 0.68        | [0.51-0.85] | 0.0869 | 0.67 | 0.86 | 0.58 |
|           |        | RF         | 0.63        | [0.45-0.79] | 0.0858 | 0.62 | 0.71 | 0.58 |
|           | KW     | AB         | 0.68        | [0.49-0.87] | 0.0967 | 0.64 | 0.86 | 0.55 |
|           |        | AE         | 0.68        | [0.49-0.86] | 0.0897 | 0.67 | 0.79 | 0.61 |
|           |        | LASSO      | 0.73        | [0.55-0.89] | 0.0882 | 0.76 | 0.79 | 0.74 |
|           |        | LDA        | 0.67        | [0.47-0.86] | 0.101  | 0.69 | 0.71 | 0.68 |
|           |        | LR         | 0.72        | [0.53-0.89] | 0.0923 | 0.78 | 0.71 | 0.81 |
|           |        | NB         | 0.71        | [0.54-0.87] | 0.0865 | 0.69 | 0.86 | 0.61 |
|           |        | RF         | 0.68        | [0.51-0.84] | 0.0831 | 0.69 | 0.71 | 0.68 |
|           | Relief | AB         | 0.61        | [0.43-0.8]  | 0.0923 | 0.6  | 0.71 | 0.55 |
|           |        | AE         | 0.68        | [0.5-0.84]  | 0.0874 | 0.62 | 0.79 | 0.55 |
|           |        | LASSO      | 0.68        | [0.5-0.85]  | 0.0889 | 0.64 | 0.79 | 0.58 |
|           |        | LDA        | 0.68        | [0.5-0.85]  | 0.0895 | 0.67 | 0.79 | 0.61 |
|           |        | LR         | 0.7         | [0.53-0.86] | 0.087  | 0.69 | 0.79 | 0.65 |
|           |        | NB         | 0.73        | [0.57-0.88] | 0.081  | 0.71 | 0.93 | 0.61 |
|           |        | RF         | 0.63        | [0.44-0.81] | 0.0942 | 0.62 | 0.71 | 0.58 |
| RFE       | AB     | 0.63       | [0.45-0.8]  | 0.0898      | 0.67   | 0.79 | 0.61 |      |
|           | AE     | 0.69       | [0.5-0.86]  | 0.0932      | 0.71   | 0.71 | 0.71 |      |
|           | LASSO  | 0.65       | [0.47-0.83] | 0.0903      | 0.67   | 0.71 | 0.65 |      |
|           | LDA    | 0.68       | [0.49-0.84] | 0.0884      | 0.67   | 0.79 | 0.61 |      |
|           | LR     | 0.66       | [0.47-0.84] | 0.0932      | 0.67   | 0.71 | 0.65 |      |
|           | NB     | 0.68       | [0.51-0.85] | 0.0867      | 0.64   | 0.86 | 0.55 |      |
|           | RF     | 0.63       | [0.46-0.8]  | 0.0888      | 0.6    | 0.71 | 0.55 |      |
| Center_02 | ANOVA  | AB         | 0.76        | [0.65-0.87] | 0.0556 | 0.75 | 0.81 | 0.69 |
|           |        | AE         | 0.81        | [0.71-0.9]  | 0.0482 | 0.77 | 0.76 | 0.79 |
|           |        | LASSO      | 0.81        | [0.71-0.9]  | 0.0497 | 0.78 | 0.81 | 0.76 |
|           |        | LDA        | 0.8         | [0.7-0.9]   | 0.0524 | 0.78 | 0.81 | 0.76 |
|           |        | LR         | 0.8         | [0.7-0.9]   | 0.0508 | 0.77 | 0.78 | 0.76 |
|           |        | NB         | 0.78        | [0.66-0.88] | 0.0529 | 0.77 | 0.78 | 0.76 |
|           |        | RF         | 0.75        | [0.63-0.86] | 0.0572 | 0.76 | 0.76 | 0.76 |
|           | KW     | AB         | 0.79        | [0.68-0.89] | 0.0522 | 0.75 | 0.86 | 0.64 |
|           |        | AE         | 0.81        | [0.7-0.9]   | 0.0485 | 0.77 | 0.78 | 0.76 |
|           |        | LASSO      | 0.81        | [0.72-0.91] | 0.0509 | 0.78 | 0.81 | 0.76 |

|        |       |      |             |        |      |      |      |
|--------|-------|------|-------------|--------|------|------|------|
|        | LDA   | 0.8  | [0.7-0.9]   | 0.0523 | 0.78 | 0.81 | 0.76 |
|        | LR    | 0.8  | [0.7-0.9]   | 0.0509 | 0.77 | 0.78 | 0.76 |
|        | NB    | 0.78 | [0.67-0.88] | 0.0527 | 0.77 | 0.78 | 0.76 |
|        | RF    | 0.75 | [0.64-0.86] | 0.0563 | 0.75 | 0.76 | 0.74 |
| Relief | AB    | 0.75 | [0.63-0.86] | 0.0566 | 0.73 | 0.81 | 0.67 |
|        | AE    | 0.8  | [0.7-0.9]   | 0.052  | 0.77 | 0.84 | 0.71 |
|        | LASSO | 0.82 | [0.72-0.91] | 0.0497 | 0.77 | 0.89 | 0.67 |
|        | LDA   | 0.78 | [0.67-0.88] | 0.0542 | 0.76 | 0.84 | 0.69 |
|        | LR    | 0.81 | [0.71-0.9]  | 0.0494 | 0.77 | 0.78 | 0.76 |
|        | NB    | 0.77 | [0.66-0.87] | 0.0538 | 0.75 | 0.76 | 0.74 |
| RFE    | RF    | 0.76 | [0.65-0.87] | 0.0552 | 0.76 | 0.78 | 0.74 |
|        | AB    | 0.77 | [0.66-0.88] | 0.0538 | 0.73 | 0.78 | 0.69 |
|        | AE    | 0.81 | [0.71-0.9]  | 0.0484 | 0.77 | 0.78 | 0.76 |
|        | LASSO | 0.82 | [0.72-0.91] | 0.0496 | 0.8  | 0.81 | 0.79 |
|        | LDA   | 0.82 | [0.72-0.91] | 0.0501 | 0.81 | 0.86 | 0.76 |
|        | LR    | 0.82 | [0.71-0.91] | 0.0497 | 0.78 | 0.81 | 0.76 |
| ANOVA  | NB    | 0.8  | [0.69-0.89] | 0.0511 | 0.77 | 0.78 | 0.76 |
|        | RF    | 0.76 | [0.65-0.87] | 0.0541 | 0.72 | 0.78 | 0.67 |
|        | AB    | 0.99 | [0.98-1]    | 0.0075 | 0.99 | 1    | 0.99 |
|        | AE    | 0.85 | [0.65-1]    | 0.113  | 0.72 | 1    | 0.71 |
|        | LASSO | 0.97 | [0.9-1]     | 0.0285 | 0.94 | 1    | 0.94 |
|        | LDA   | 0.97 | [0.91-1]    | 0.0239 | 0.95 | 1    | 0.95 |
| KW     | LR    | 0.97 | [0.91-1]    | 0.0248 | 0.95 | 1    | 0.95 |
|        | NB    | 0.97 | [0.92-1]    | 0.0243 | 0.95 | 1    | 0.95 |
|        | RF    | 0.99 | [0.97-1]    | 0.0082 | 0.99 | 1    | 0.99 |
|        | AB    | 0.98 | [0.95-1]    | 0.0162 | 0.97 | 1    | 0.97 |
|        | AE    | 0.71 | [0.35-1]    | 0.221  | 0.99 | 0.5  | 1    |
|        | LASSO | 0.96 | [0.89-1]    | 0.0324 | 0.93 | 1    | 0.92 |
| Relief | LDA   | 0.99 | [0.98-1]    | 0.0076 | 0.99 | 1    | 0.99 |
|        | LR    | 0.97 | [0.9-1]     | 0.0284 | 0.94 | 1    | 0.94 |
|        | NB    | 0.95 | [0.91-0.99] | 0.0214 | 0.95 | 1    | 0.95 |
|        | RF    | 0.98 | [0.94-1]    | 0.0165 | 0.97 | 1    | 0.97 |
|        | AB    | 0.99 | [0.96-1]    | 0.0117 | 0.98 | 1    | 0.98 |
|        | AE    | 0.69 | [0.31-1]    | 0.236  | 0.99 | 0.5  | 1    |
| RFE    | LASSO | 0.98 | [0.95-1]    | 0.0147 | 0.98 | 1    | 0.98 |
|        | LDA   | 0.98 | [0.95-1]    | 0.0147 | 0.98 | 1    | 0.98 |
|        | LR    | 0.98 | [0.96-1]    | 0.0128 | 0.98 | 1    | 0.98 |
|        | NB    | 0.99 | [0.96-1]    | 0.0121 | 0.98 | 1    | 0.98 |
| RFE    | RF    | 1    | [1-1]       | 0      | 1    | 1    | 1    |
|        | AB    | 0.99 | [0.98-1]    | 0.0075 | 0.99 | 1    | 0.99 |
|        | AE    | 0.8  | [0.53-1]    | 0.153  | 0.61 | 1    | 0.6  |

Center\_03

|                  |        |       |      |             |        |      |      |      |
|------------------|--------|-------|------|-------------|--------|------|------|------|
|                  |        | LASSO | 0.98 | [0.93-1]    | 0.0204 | 0.96 | 1    | 0.96 |
|                  |        | LDA   | 0.98 | [0.95-1]    | 0.0164 | 0.97 | 1    | 0.97 |
|                  |        | LR    | 0.97 | [0.91-1]    | 0.0242 | 0.95 | 1    | 0.95 |
|                  |        | NB    | 0.98 | [0.95-1]    | 0.0154 | 0.97 | 1    | 0.97 |
|                  |        | RF    | 1    | [1-1]       | 0      | 1    | 1    | 1    |
|                  |        | AB    | 0.91 | [0.83-0.97] | 0.036  | 0.84 | 0.88 | 0.83 |
|                  |        | AE    | 0.92 | [0.83-0.98] | 0.0385 | 0.9  | 0.92 | 0.9  |
|                  | ANOVA  | LASSO | 0.92 | [0.84-0.97] | 0.0355 | 0.87 | 0.88 | 0.87 |
|                  |        | LDA   | 0.9  | [0.81-0.96] | 0.0392 | 0.83 | 0.88 | 0.82 |
|                  |        | LR    | 0.91 | [0.82-0.97] | 0.0392 | 0.87 | 0.88 | 0.87 |
|                  |        | NB    | 0.92 | [0.85-0.97] | 0.0325 | 0.86 | 0.92 | 0.85 |
|                  |        | RF    | 0.92 | [0.85-0.98] | 0.0349 | 0.89 | 0.83 | 0.91 |
|                  |        | AB    | 0.91 | [0.83-0.97] | 0.0363 | 0.8  | 0.92 | 0.77 |
|                  |        | AE    | 0.92 | [0.83-0.98] | 0.0377 | 0.85 | 0.88 | 0.84 |
|                  | KW     | LASSO | 0.91 | [0.83-0.97] | 0.0364 | 0.87 | 0.88 | 0.87 |
|                  |        | LDA   | 0.93 | [0.87-0.97] | 0.0259 | 0.84 | 0.88 | 0.83 |
|                  |        | LR    | 0.91 | [0.82-0.97] | 0.0393 | 0.87 | 0.88 | 0.87 |
|                  |        | NB    | 0.92 | [0.85-0.97] | 0.0325 | 0.86 | 0.92 | 0.85 |
|                  |        | RF    | 0.93 | [0.86-0.98] | 0.0319 | 0.86 | 0.88 | 0.86 |
| <b>Center_04</b> |        | AB    | 0.91 | [0.84-0.97] | 0.0325 | 0.79 | 0.96 | 0.75 |
|                  |        | AE    | 0.91 | [0.83-0.97] | 0.0347 | 0.83 | 0.88 | 0.82 |
|                  | Relief | LASSO | 0.91 | [0.82-0.96] | 0.0353 | 0.85 | 0.88 | 0.84 |
|                  |        | LDA   | 0.92 | [0.85-0.98] | 0.0329 | 0.87 | 0.88 | 0.87 |
|                  |        | LR    | 0.91 | [0.82-0.97] | 0.0386 | 0.87 | 0.88 | 0.87 |
|                  |        | NB    | 0.92 | [0.85-0.98] | 0.0326 | 0.85 | 0.92 | 0.83 |
|                  |        | RF    | 0.92 | [0.84-0.97] | 0.0341 | 0.82 | 0.88 | 0.8  |
|                  |        | AB    | 0.93 | [0.86-0.97] | 0.0291 | 0.87 | 0.88 | 0.87 |
|                  |        | AE    | 0.92 | [0.83-0.98] | 0.0375 | 0.81 | 0.92 | 0.78 |
|                  | RFE    | LASSO | 0.92 | [0.83-0.98] | 0.0361 | 0.84 | 0.92 | 0.82 |
|                  |        | LDA   | 0.93 | [0.86-0.97] | 0.0277 | 0.85 | 0.92 | 0.83 |
|                  |        | LR    | 0.92 | [0.85-0.97] | 0.0336 | 0.87 | 0.88 | 0.87 |
|                  |        | NB    | 0.92 | [0.85-0.97] | 0.0325 | 0.86 | 0.92 | 0.85 |
|                  |        | RF    | 0.93 | [0.87-0.98] | 0.0277 | 0.83 | 0.92 | 0.8  |
|                  |        | AB    | 0.86 | [0.74-0.95] | 0.0524 | 0.88 | 0.71 | 0.91 |
|                  |        | AE    | 0.86 | [0.78-0.93] | 0.0385 | 0.83 | 0.9  | 0.82 |
|                  | ANOVA  | LASSO | 0.82 | [0.71-0.9]  | 0.0503 | 0.82 | 0.86 | 0.82 |
|                  |        | LDA   | 0.84 | [0.72-0.93] | 0.0528 | 0.83 | 0.86 | 0.83 |
|                  |        | LR    | 0.83 | [0.72-0.91] | 0.0502 | 0.85 | 0.86 | 0.85 |
|                  |        | NB    | 0.83 | [0.73-0.91] | 0.0453 | 0.78 | 0.86 | 0.76 |
|                  |        | RF    | 0.9  | [0.82-0.95] | 0.0343 | 0.82 | 0.9  | 0.81 |
| <b>Center_05</b> | KW     | AB    | 0.85 | [0.74-0.94] | 0.0502 | 0.8  | 0.86 | 0.78 |

|           |        |       |      |             |        |      |      |      |
|-----------|--------|-------|------|-------------|--------|------|------|------|
|           |        | AE    | 0.89 | [0.81-0.95] | 0.0364 | 0.79 | 0.95 | 0.75 |
|           |        | LASSO | 0.84 | [0.74-0.92] | 0.0453 | 0.82 | 0.9  | 0.8  |
|           |        | LDA   | 0.84 | [0.74-0.92] | 0.0468 | 0.78 | 0.95 | 0.74 |
|           |        | LR    | 0.83 | [0.74-0.91] | 0.0462 | 0.82 | 0.86 | 0.82 |
|           |        | NB    | 0.85 | [0.76-0.92] | 0.0409 | 0.78 | 0.9  | 0.75 |
|           |        | RF    | 0.9  | [0.82-0.95] | 0.0347 | 0.84 | 0.9  | 0.83 |
|           |        | AB    | 0.9  | [0.82-0.96] | 0.0382 | 0.84 | 0.9  | 0.83 |
|           |        | AE    | 0.87 | [0.78-0.94] | 0.0428 | 0.75 | 0.95 | 0.7  |
|           | Relief | LASSO | 0.82 | [0.71-0.9]  | 0.05   | 0.72 | 0.86 | 0.69 |
|           |        | LDA   | 0.8  | [0.68-0.9]  | 0.0544 | 0.75 | 0.81 | 0.73 |
|           |        | LR    | 0.86 | [0.78-0.93] | 0.0384 | 0.82 | 0.86 | 0.82 |
|           |        | NB    | 0.77 | [0.64-0.88] | 0.063  | 0.7  | 0.76 | 0.69 |
|           |        | RF    | 0.93 | [0.88-0.97] | 0.0242 | 0.87 | 0.95 | 0.85 |
|           |        | AB    | 0.87 | [0.76-0.95] | 0.0479 | 0.75 | 0.95 | 0.7  |
|           |        | AE    | 0.88 | [0.78-0.94] | 0.0395 | 0.8  | 0.9  | 0.77 |
|           | RFE    | LASSO | 0.8  | [0.69-0.9]  | 0.0563 | 0.68 | 0.9  | 0.62 |
|           |        | LDA   | 0.82 | [0.71-0.91] | 0.052  | 0.75 | 0.86 | 0.73 |
|           |        | LR    | 0.8  | [0.68-0.91] | 0.0577 | 0.75 | 0.81 | 0.73 |
|           |        | NB    | 0.83 | [0.73-0.91] | 0.0457 | 0.81 | 0.86 | 0.8  |
|           |        | RF    | 0.9  | [0.82-0.96] | 0.0329 | 0.83 | 0.86 | 0.83 |
|           |        | AB    | 0.84 | [0.75-0.91] | 0.0388 | 0.79 | 0.85 | 0.75 |
|           |        | AE    | 0.86 | [0.79-0.92] | 0.0347 | 0.79 | 0.83 | 0.76 |
|           | ANOVA  | LASSO | 0.86 | [0.78-0.93] | 0.036  | 0.82 | 0.83 | 0.82 |
|           |        | LDA   | 0.85 | [0.77-0.91] | 0.0367 | 0.8  | 0.87 | 0.75 |
|           |        | LR    | 0.87 | [0.8-0.93]  | 0.0335 | 0.81 | 0.89 | 0.76 |
|           |        | NB    | 0.85 | [0.77-0.91] | 0.0378 | 0.8  | 0.87 | 0.75 |
|           |        | RF    | 0.86 | [0.79-0.92] | 0.0338 | 0.81 | 0.8  | 0.81 |
|           |        | AB    | 0.83 | [0.75-0.9]  | 0.0379 | 0.77 | 0.83 | 0.74 |
|           |        | AE    | 0.85 | [0.77-0.91] | 0.0367 | 0.79 | 0.87 | 0.74 |
|           | KW     | LASSO | 0.87 | [0.79-0.93] | 0.0339 | 0.81 | 0.87 | 0.76 |
| Center_06 |        | LDA   | 0.86 | [0.79-0.92] | 0.0347 | 0.77 | 0.93 | 0.67 |
|           |        | LR    | 0.86 | [0.78-0.92] | 0.0358 | 0.81 | 0.85 | 0.79 |
|           |        | NB    | 0.84 | [0.76-0.91] | 0.0384 | 0.75 | 0.87 | 0.68 |
|           |        | RF    | 0.86 | [0.78-0.92] | 0.035  | 0.78 | 0.8  | 0.76 |
|           |        | AB    | 0.84 | [0.76-0.9]  | 0.0361 | 0.79 | 0.8  | 0.78 |
|           |        | AE    | 0.85 | [0.77-0.92] | 0.0356 | 0.76 | 0.91 | 0.67 |
|           | Relief | LASSO | 0.88 | [0.81-0.94] | 0.0322 | 0.81 | 0.87 | 0.76 |
|           |        | LDA   | 0.87 | [0.8-0.93]  | 0.0328 | 0.8  | 0.85 | 0.76 |
|           |        | LR    | 0.87 | [0.79-0.93] | 0.0342 | 0.8  | 0.87 | 0.75 |
|           |        | NB    | 0.84 | [0.76-0.91] | 0.0389 | 0.79 | 0.85 | 0.75 |
|           |        | RF    | 0.87 | [0.79-0.93] | 0.0338 | 0.83 | 0.85 | 0.82 |

|           |        |       |      |             |        |      |      |      |
|-----------|--------|-------|------|-------------|--------|------|------|------|
|           |        | AB    | 0.84 | [0.76-0.91] | 0.0383 | 0.77 | 0.85 | 0.72 |
|           |        | AE    | 0.86 | [0.78-0.92] | 0.0352 | 0.79 | 0.91 | 0.71 |
|           |        | LASSO | 0.87 | [0.79-0.93] | 0.0341 | 0.81 | 0.87 | 0.78 |
|           | RFE    | LDA   | 0.86 | [0.78-0.92] | 0.0359 | 0.81 | 0.87 | 0.76 |
|           |        | LR    | 0.87 | [0.79-0.93] | 0.0351 | 0.79 | 0.93 | 0.69 |
|           |        | NB    | 0.84 | [0.76-0.91] | 0.0402 | 0.79 | 0.83 | 0.76 |
|           |        | RF    | 0.87 | [0.8-0.93]  | 0.0332 | 0.81 | 0.87 | 0.78 |
|           |        | AB    | 0.89 | [0.8-0.96]  | 0.0442 | 0.82 | 0.91 | 0.82 |
|           |        | AE    | 0.65 | [0.47-0.81] | 0.0863 | 0.57 | 0.73 | 0.56 |
|           |        | LASSO | 0.86 | [0.71-0.98] | 0.0712 | 0.85 | 0.82 | 0.85 |
|           | ANOVA  | LDA   | 0.92 | [0.83-0.98] | 0.0396 | 0.88 | 0.91 | 0.88 |
|           |        | LR    | 0.92 | [0.84-0.97] | 0.0342 | 0.82 | 0.91 | 0.82 |
|           |        | NB    | 0.92 | [0.85-0.98] | 0.0343 | 0.82 | 0.91 | 0.82 |
|           |        | RF    | 0.88 | [0.77-0.98] | 0.0558 | 0.86 | 0.82 | 0.86 |
|           |        | AB    | 0.94 | [0.87-0.99] | 0.031  | 0.84 | 0.91 | 0.83 |
|           |        | AE    | 0.61 | [0.45-0.77] | 0.0814 | 0.33 | 1    | 0.27 |
|           |        | LASSO | 0.87 | [0.76-0.97] | 0.0538 | 0.81 | 0.82 | 0.81 |
|           | KW     | LDA   | 0.89 | [0.79-0.96] | 0.0435 | 0.8  | 0.82 | 0.79 |
|           |        | LR    | 0.87 | [0.76-0.97] | 0.0561 | 0.82 | 0.82 | 0.82 |
|           |        | NB    | 0.92 | [0.85-0.98] | 0.0346 | 0.82 | 0.91 | 0.81 |
|           |        | RF    | 0.89 | [0.75-0.98] | 0.0609 | 0.9  | 0.82 | 0.9  |
| Center_07 |        | AB    | 0.86 | [0.75-0.95] | 0.0511 | 0.79 | 0.91 | 0.78 |
|           |        | AE    | 0.8  | [0.7-0.89]  | 0.049  | 0.69 | 0.91 | 0.68 |
|           |        | LASSO | 0.92 | [0.81-0.99] | 0.0474 | 0.85 | 0.91 | 0.85 |
|           | Relief | LDA   | 0.89 | [0.8-0.97]  | 0.0427 | 0.73 | 0.91 | 0.72 |
|           |        | LR    | 0.92 | [0.83-0.99] | 0.0413 | 0.79 | 0.91 | 0.78 |
|           |        | NB    | 0.91 | [0.83-0.98] | 0.0383 | 0.95 | 0.73 | 0.96 |
|           |        | RF    | 0.91 | [0.85-0.97] | 0.0318 | 0.75 | 1    | 0.73 |
|           |        | AB    | 0.89 | [0.79-0.96] | 0.0429 | 0.79 | 0.91 | 0.78 |
|           |        | AE    | 0.71 | [0.55-0.86] | 0.0764 | 0.54 | 0.91 | 0.51 |
|           |        | LASSO | 0.86 | [0.74-0.97] | 0.0606 | 0.8  | 0.82 | 0.8  |
|           | RFE    | LDA   | 0.9  | [0.78-0.98] | 0.0523 | 0.82 | 0.91 | 0.81 |
|           |        | LR    | 0.88 | [0.74-0.99] | 0.0645 | 0.88 | 0.82 | 0.88 |
|           |        | NB    | 0.9  | [0.81-0.97] | 0.04   | 0.79 | 0.91 | 0.78 |
|           |        | RF    | 0.89 | [0.76-0.98] | 0.0577 | 0.78 | 0.91 | 0.77 |
|           |        | AB    | 0.74 | [0.62-0.85] | 0.0574 | 0.71 | 0.81 | 0.7  |
|           |        | AE    | 0.7  | [0.55-0.84] | 0.0731 | 0.68 | 0.71 | 0.68 |
|           |        | LASSO | 0.75 | [0.6-0.88]  | 0.0676 | 0.75 | 0.71 | 0.76 |
| Center_08 | ANOVA  | LDA   | 0.74 | [0.61-0.86] | 0.0621 | 0.71 | 0.71 | 0.71 |
|           |        | LR    | 0.75 | [0.59-0.88] | 0.0708 | 0.78 | 0.71 | 0.79 |
|           |        | NB    | 0.69 | [0.54-0.83] | 0.0724 | 0.69 | 0.67 | 0.69 |



|  |        |       |      |             |        |      |      |      |
|--|--------|-------|------|-------------|--------|------|------|------|
|  |        | RF    | 0.76 | [0.64-0.87] | 0.0594 | 0.75 | 0.76 | 0.74 |
|  |        | AB    | 0.75 | [0.62-0.86] | 0.062  | 0.71 | 0.71 | 0.71 |
|  |        | AE    | 0.69 | [0.54-0.82] | 0.0733 | 0.6  | 0.76 | 0.58 |
|  |        | LASSO | 0.74 | [0.6-0.86]  | 0.0649 | 0.64 | 0.81 | 0.61 |
|  | KW     | LDA   | 0.73 | [0.59-0.85] | 0.0643 | 0.6  | 0.81 | 0.57 |
|  |        | LR    | 0.75 | [0.61-0.88] | 0.0657 | 0.67 | 0.76 | 0.66 |
|  |        | NB    | 0.68 | [0.54-0.82] | 0.0726 | 0.85 | 0.43 | 0.91 |
|  |        | RF    | 0.75 | [0.62-0.86] | 0.0611 | 0.72 | 0.76 | 0.71 |
|  |        | AB    | 0.68 | [0.53-0.83] | 0.0764 | 0.62 | 0.81 | 0.59 |
|  |        | AE    | 0.7  | [0.54-0.83] | 0.0702 | 0.71 | 0.71 | 0.71 |
|  |        | LASSO | 0.74 | [0.6-0.86]  | 0.0645 | 0.6  | 0.86 | 0.56 |
|  | Relief | LDA   | 0.71 | [0.56-0.84] | 0.068  | 0.65 | 0.71 | 0.64 |
|  |        | LR    | 0.72 | [0.57-0.86] | 0.0703 | 0.58 | 0.86 | 0.54 |
|  |        | NB    | 0.68 | [0.53-0.82] | 0.0727 | 0.63 | 0.71 | 0.62 |
|  |        | RF    | 0.75 | [0.63-0.87] | 0.0586 | 0.69 | 0.71 | 0.69 |
|  |        | AB    | 0.76 | [0.64-0.87] | 0.0585 | 0.71 | 0.76 | 0.71 |
|  |        | AE    | 0.69 | [0.54-0.83] | 0.0719 | 0.7  | 0.71 | 0.69 |
|  |        | LASSO | 0.73 | [0.59-0.85] | 0.0648 | 0.59 | 0.81 | 0.56 |
|  | RFE    | LDA   | 0.74 | [0.59-0.87] | 0.0727 | 0.69 | 0.76 | 0.68 |
|  |        | LR    | 0.74 | [0.59-0.87] | 0.071  | 0.65 | 0.86 | 0.62 |
|  |        | NB    | 0.71 | [0.57-0.84] | 0.0703 | 0.66 | 0.71 | 0.66 |
|  |        | RF    | 0.74 | [0.61-0.86] | 0.0632 | 0.65 | 0.81 | 0.63 |
|  |        | AB    | 0.96 | [0.92-1]    | 0.0188 | 0.95 | 1    | 0.94 |
|  |        | AB    | 0.96 | [0.92-1]    | 0.0188 | 0.95 | 1    | 0.94 |
|  |        | AE    | 0.87 | [0.75-0.98] | 0.0566 | 0.77 | 1    | 0.77 |
|  |        | AE    | 0.87 | [0.75-0.98] | 0.0566 | 0.77 | 1    | 0.77 |
|  |        | LASSO | 0.8  | [0.63-0.97] | 0.0867 | 0.66 | 1    | 0.66 |
|  |        | LASSO | 0.74 | [0.57-0.98] | 0.11   | 0.63 | 1    | 0.63 |
|  |        | LDA   | 0.86 | [0.64-0.99] | 0.0966 | 0.66 | 1    | 0.66 |
|  |        | LDA   | 0.86 | [0.64-0.99] | 0.0966 | 0.66 | 1    | 0.66 |
|  |        | LR    | 0.81 | [0.65-1]    | 0.0916 | 0.69 | 1    | 0.68 |
|  |        | LR    | 0.81 | [0.65-1]    | 0.0916 | 0.69 | 1    | 0.68 |
|  | KW     | NB    | 0.86 | [0.67-0.99] | 0.0823 | 0.7  | 1    | 0.7  |
|  |        | NB    | 0.86 | [0.67-0.99] | 0.0823 | 0.7  | 1    | 0.7  |
|  |        | RF    | 0.86 | [0.66-0.97] | 0.0849 | 0.66 | 1    | 0.65 |
|  |        | RF    | 0.83 | [0.53-0.98] | 0.13   | 0.96 | 0.67 | 0.96 |
|  |        | AB    | 0.83 | [0.6-0.97]  | 0.104  | 0.63 | 1    | 0.62 |
|  |        | AE    | 0.87 | [0.71-0.98] | 0.0717 | 0.74 | 1    | 0.73 |
|  |        | LASSO | 0.67 | [0.48-0.96] | 0.134  | 0.54 | 1    | 0.53 |
|  | Relief | LDA   | 0.81 | [0.66-0.93] | 0.0679 | 0.69 | 1    | 0.69 |
|  |        | LR    | 0.61 | [0.38-0.96] | 0.158  | 0.45 | 1    | 0.44 |

|                  |        |       |      |             |        |      |      |      |
|------------------|--------|-------|------|-------------|--------|------|------|------|
|                  |        | NB    | 0.88 | [0.7-0.99]  | 0.079  | 0.73 | 1    | 0.72 |
|                  |        | RF    | 0.84 | [0.61-0.97] | 0.0992 | 0.93 | 0.67 | 0.93 |
|                  |        | AB    | 0.96 | [0.93-0.98] | 0.0151 | 0.96 | 1    | 0.96 |
|                  |        | AE    | 0.87 | [0.76-0.95] | 0.0476 | 0.79 | 1    | 0.78 |
|                  |        | LASSO | 0.61 | [0.36-0.96] | 0.165  | 0.4  | 1    | 0.39 |
|                  | RFE    | LDA   | 0.88 | [0.66-0.99] | 0.0958 | 0.68 | 1    | 0.68 |
|                  |        | LR    | 0.57 | [0.32-0.97] | 0.182  | 0.36 | 1    | 0.35 |
|                  |        | NB    | 0.87 | [0.67-0.98] | 0.0837 | 0.7  | 1    | 0.7  |
|                  |        | RF    | 0.83 | [0.59-0.97] | 0.103  | 0.59 | 1    | 0.58 |
|                  |        | AB    | 0.65 | [0.52-0.77] | 0.0647 | 0.61 | 0.68 | 0.61 |
|                  |        | AE    | 0.64 | [0.51-0.75] | 0.0628 | 0.63 | 0.72 | 0.62 |
|                  |        | LASSO | 0.65 | [0.52-0.78] | 0.0651 | 0.66 | 0.68 | 0.66 |
|                  | ANOVA  | LDA   | 0.65 | [0.52-0.77] | 0.0647 | 0.65 | 0.68 | 0.64 |
|                  |        | LR    | 0.65 | [0.52-0.78] | 0.0659 | 0.68 | 0.68 | 0.68 |
|                  |        | NB    | 0.66 | [0.53-0.77] | 0.0615 | 0.68 | 0.76 | 0.67 |
|                  |        | RF    | 0.7  | [0.58-0.82] | 0.0587 | 0.62 | 0.76 | 0.6  |
|                  |        | AB    | 0.63 | [0.49-0.75] | 0.0664 | 0.61 | 0.68 | 0.61 |
|                  |        | AE    | 0.69 | [0.56-0.82] | 0.0647 | 0.69 | 0.72 | 0.68 |
|                  |        | LASSO | 0.65 | [0.51-0.77] | 0.0646 | 0.61 | 0.72 | 0.59 |
|                  | KW     | LDA   | 0.64 | [0.5-0.77]  | 0.0663 | 0.62 | 0.64 | 0.62 |
|                  |        | LR    | 0.63 | [0.49-0.76] | 0.0667 | 0.54 | 0.76 | 0.51 |
|                  |        | NB    | 0.66 | [0.53-0.77] | 0.0621 | 0.67 | 0.72 | 0.67 |
|                  |        | RF    | 0.7  | [0.59-0.82] | 0.0579 | 0.67 | 0.68 | 0.67 |
| <b>Center_10</b> |        | AB    | 0.5  | [0.36-0.65] | 0.0708 | 0.55 | 0.56 | 0.55 |
|                  |        | AE    | 0.57 | [0.44-0.7]  | 0.0671 | 0.55 | 0.68 | 0.53 |
|                  |        | LASSO | 0.58 | [0.44-0.72] | 0.0725 | 0.6  | 0.64 | 0.59 |
|                  | Relief | LDA   | 0.56 | [0.41-0.72] | 0.0773 | 0.6  | 0.64 | 0.59 |
|                  |        | LR    | 0.6  | [0.47-0.74] | 0.0693 | 0.56 | 0.68 | 0.54 |
|                  |        | NB    | 0.65 | [0.53-0.77] | 0.0617 | 0.55 | 0.84 | 0.51 |
|                  |        | RF    | 0.65 | [0.54-0.77] | 0.0595 | 0.55 | 0.76 | 0.52 |
|                  |        | AB    | 0.67 | [0.54-0.79] | 0.0636 | 0.59 | 0.72 | 0.57 |
|                  |        | AE    | 0.65 | [0.53-0.79] | 0.0648 | 0.65 | 0.68 | 0.65 |
|                  |        | LASSO | 0.61 | [0.46-0.75] | 0.0725 | 0.85 | 0.36 | 0.92 |
|                  | RFE    | LDA   | 0.57 | [0.43-0.72] | 0.0736 | 0.58 | 0.64 | 0.57 |
|                  |        | LR    | 0.62 | [0.47-0.76] | 0.0703 | 0.84 | 0.36 | 0.91 |
|                  |        | NB    | 0.66 | [0.53-0.78] | 0.0613 | 0.66 | 0.76 | 0.65 |
|                  |        | RF    | 0.69 | [0.59-0.8]  | 0.0529 | 0.58 | 0.76 | 0.55 |
|                  |        | AB    | 0.78 | [0.7-0.87]  | 0.0447 | 0.77 | 0.75 | 0.77 |
|                  |        | AE    | 0.81 | [0.74-0.88] | 0.0376 | 0.73 | 0.82 | 0.72 |
| <b>Center_11</b> | ANOVA  | LASSO | 0.85 | [0.77-0.92] | 0.0368 | 0.79 | 0.79 | 0.79 |
|                  |        | LDA   | 0.85 | [0.76-0.93] | 0.0424 | 0.82 | 0.82 | 0.82 |

|                  |        |       |      |             |        |      |      |      |
|------------------|--------|-------|------|-------------|--------|------|------|------|
|                  |        | LR    | 0.86 | [0.78-0.92] | 0.0369 | 0.84 | 0.79 | 0.85 |
|                  |        | NB    | 0.82 | [0.74-0.88] | 0.0359 | 0.75 | 0.79 | 0.75 |
|                  |        | RF    | 0.81 | [0.72-0.89] | 0.042  | 0.75 | 0.79 | 0.74 |
|                  | KW     | AB    | 0.77 | [0.69-0.85] | 0.0403 | 0.67 | 0.75 | 0.66 |
|                  |        | AE    | 0.83 | [0.75-0.89] | 0.0376 | 0.72 | 0.86 | 0.7  |
|                  |        | LASSO | 0.84 | [0.76-0.91] | 0.0365 | 0.77 | 0.79 | 0.77 |
|                  |        | LDA   | 0.83 | [0.73-0.91] | 0.0459 | 0.78 | 0.82 | 0.77 |
|                  |        | LR    | 0.85 | [0.76-0.91] | 0.0383 | 0.76 | 0.82 | 0.75 |
|                  |        | NB    | 0.82 | [0.74-0.88] | 0.0362 | 0.71 | 0.86 | 0.69 |
|                  |        | RF    | 0.82 | [0.75-0.88] | 0.0367 | 0.69 | 0.86 | 0.67 |
|                  | Relief | AB    | 0.8  | [0.71-0.89] | 0.0418 | 0.72 | 0.79 | 0.71 |
|                  |        | AE    | 0.81 | [0.73-0.88] | 0.0382 | 0.74 | 0.75 | 0.74 |
|                  |        | LASSO | 0.83 | [0.75-0.9]  | 0.0386 | 0.68 | 0.93 | 0.64 |
|                  |        | LDA   | 0.85 | [0.79-0.91] | 0.0318 | 0.7  | 0.96 | 0.66 |
|                  |        | LR    | 0.83 | [0.75-0.9]  | 0.0378 | 0.68 | 0.93 | 0.64 |
|                  |        | NB    | 0.8  | [0.72-0.87] | 0.0379 | 0.7  | 0.82 | 0.68 |
|                  |        | RF    | 0.8  | [0.72-0.88] | 0.041  | 0.67 | 0.89 | 0.64 |
|                  | RFE    | AB    | 0.82 | [0.75-0.89] | 0.036  | 0.71 | 0.86 | 0.69 |
|                  |        | AE    | 0.85 | [0.76-0.91] | 0.0368 | 0.69 | 0.89 | 0.66 |
|                  |        | LASSO | 0.83 | [0.75-0.9]  | 0.0395 | 0.69 | 0.86 | 0.67 |
|                  |        | LDA   | 0.83 | [0.75-0.91] | 0.0393 | 0.71 | 0.86 | 0.69 |
|                  |        | LR    | 0.83 | [0.75-0.9]  | 0.0388 | 0.64 | 0.93 | 0.61 |
|                  |        | NB    | 0.81 | [0.73-0.88] | 0.0379 | 0.73 | 0.79 | 0.73 |
|                  |        | RF    | 0.81 | [0.73-0.88] | 0.0385 | 0.66 | 0.89 | 0.63 |
|                  | ANOVA  | AB    | 0.76 | [0.67-0.84] | 0.0443 | 0.68 | 0.76 | 0.66 |
|                  |        | AE    | 0.82 | [0.74-0.89] | 0.0372 | 0.74 | 0.82 | 0.73 |
|                  |        | LASSO | 0.84 | [0.77-0.9]  | 0.0351 | 0.79 | 0.79 | 0.79 |
|                  |        | LDA   | 0.83 | [0.75-0.9]  | 0.0382 | 0.76 | 0.79 | 0.75 |
|                  |        | LR    | 0.86 | [0.8-0.91]  | 0.0295 | 0.79 | 0.79 | 0.79 |
|                  |        | NB    | 0.83 | [0.76-0.9]  | 0.0372 | 0.81 | 0.79 | 0.81 |
|                  |        | RF    | 0.82 | [0.74-0.89] | 0.037  | 0.77 | 0.76 | 0.77 |
| <b>Center_12</b> | KW     | AB    | 0.78 | [0.7-0.84]  | 0.0359 | 0.63 | 0.84 | 0.6  |
|                  |        | AE    | 0.79 | [0.72-0.87] | 0.037  | 0.72 | 0.79 | 0.71 |
|                  |        | LASSO | 0.85 | [0.78-0.91] | 0.0326 | 0.72 | 0.87 | 0.69 |
|                  |        | LDA   | 0.82 | [0.74-0.89] | 0.0371 | 0.73 | 0.79 | 0.73 |
|                  |        | LR    | 0.86 | [0.8-0.91]  | 0.0283 | 0.69 | 0.95 | 0.65 |
|                  |        | NB    | 0.83 | [0.76-0.9]  | 0.0366 | 0.78 | 0.79 | 0.78 |
|                  |        | RF    | 0.82 | [0.75-0.88] | 0.0334 | 0.73 | 0.79 | 0.73 |
|                  | Relief | AB    | 0.69 | [0.57-0.8]  | 0.0535 | 0.66 | 0.71 | 0.65 |
|                  |        | AE    | 0.79 | [0.7-0.86]  | 0.0401 | 0.7  | 0.76 | 0.69 |
|                  |        | LASSO | 0.81 | [0.74-0.87] | 0.0344 | 0.69 | 0.84 | 0.67 |

|           |        |       |      |             |        |      |      |      |
|-----------|--------|-------|------|-------------|--------|------|------|------|
|           |        | LDA   | 0.77 | [0.68-0.85] | 0.0411 | 0.7  | 0.74 | 0.7  |
|           |        | LR    | 0.84 | [0.78-0.9]  | 0.0305 | 0.7  | 0.87 | 0.67 |
|           |        | NB    | 0.82 | [0.74-0.9]  | 0.0393 | 0.74 | 0.84 | 0.72 |
|           |        | RF    | 0.82 | [0.75-0.88] | 0.0353 | 0.75 | 0.79 | 0.74 |
|           |        | AB    | 0.74 | [0.64-0.84] | 0.0512 | 0.74 | 0.74 | 0.74 |
|           |        | AE    | 0.79 | [0.72-0.86] | 0.038  | 0.71 | 0.82 | 0.69 |
|           |        | LASSO | 0.82 | [0.76-0.89] | 0.0352 | 0.7  | 0.87 | 0.67 |
|           | RFE    | LDA   | 0.74 | [0.65-0.82] | 0.0449 | 0.56 | 0.89 | 0.5  |
|           |        | LR    | 0.85 | [0.79-0.9]  | 0.0297 | 0.69 | 0.95 | 0.65 |
|           |        | NB    | 0.83 | [0.76-0.91] | 0.0379 | 0.73 | 0.87 | 0.71 |
|           |        | RF    | 0.82 | [0.75-0.88] | 0.0345 | 0.7  | 0.87 | 0.68 |
|           |        | AB    | 0.82 | [0.73-0.89] | 0.0411 | 0.78 | 0.79 | 0.78 |
|           |        | AE    | 0.83 | [0.74-0.91] | 0.0439 | 0.82 | 0.79 | 0.82 |
|           |        | LASSO | 0.88 | [0.82-0.94] | 0.0297 | 0.81 | 0.82 | 0.8  |
|           | ANOVA  | LDA   | 0.9  | [0.84-0.94] | 0.0236 | 0.81 | 0.86 | 0.8  |
|           |        | LR    | 0.88 | [0.82-0.93] | 0.0283 | 0.79 | 0.86 | 0.78 |
|           |        | NB    | 0.83 | [0.74-0.91] | 0.0433 | 0.84 | 0.68 | 0.86 |
|           |        | RF    | 0.85 | [0.77-0.9]  | 0.0333 | 0.77 | 0.79 | 0.77 |
|           |        | AB    | 0.83 | [0.74-0.9]  | 0.0413 | 0.67 | 0.86 | 0.65 |
|           |        | AE    | 0.81 | [0.72-0.89] | 0.0425 | 0.68 | 0.89 | 0.66 |
|           |        | LASSO | 0.88 | [0.82-0.94] | 0.0297 | 0.79 | 0.86 | 0.78 |
|           | KW     | LDA   | 0.88 | [0.82-0.93] | 0.0292 | 0.7  | 0.93 | 0.67 |
|           |        | LR    | 0.89 | [0.83-0.94] | 0.0274 | 0.79 | 0.86 | 0.79 |
|           |        | NB    | 0.83 | [0.74-0.91] | 0.044  | 0.77 | 0.79 | 0.77 |
|           |        | RF    | 0.85 | [0.78-0.9]  | 0.0325 | 0.68 | 0.93 | 0.66 |
| Center_13 |        | AB    | 0.84 | [0.72-0.92] | 0.0507 | 0.77 | 0.86 | 0.77 |
|           |        | AE    | 0.75 | [0.66-0.83] | 0.0445 | 0.68 | 0.75 | 0.68 |
|           |        | LASSO | 0.88 | [0.82-0.94] | 0.0296 | 0.63 | 1    | 0.59 |
|           | Relief | LDA   | 0.89 | [0.85-0.93] | 0.0217 | 0.76 | 1    | 0.73 |
|           |        | LR    | 0.89 | [0.83-0.94] | 0.0266 | 0.67 | 1    | 0.64 |
|           |        | NB    | 0.79 | [0.69-0.88] | 0.048  | 0.74 | 0.75 | 0.74 |
|           |        | RF    | 0.84 | [0.77-0.91] | 0.0345 | 0.79 | 0.79 | 0.79 |
|           |        | AB    | 0.85 | [0.77-0.92] | 0.0389 | 0.82 | 0.82 | 0.82 |
|           |        | AE    | 0.81 | [0.73-0.89] | 0.0419 | 0.67 | 0.89 | 0.65 |
|           |        | LASSO | 0.86 | [0.78-0.92] | 0.0366 | 0.74 | 0.89 | 0.72 |
|           | RFE    | LDA   | 0.87 | [0.78-0.93] | 0.0405 | 0.7  | 0.93 | 0.68 |
|           |        | LR    | 0.88 | [0.81-0.94] | 0.0307 | 0.79 | 0.82 | 0.78 |
|           |        | NB    | 0.83 | [0.75-0.91] | 0.0408 | 0.87 | 0.68 | 0.89 |
|           |        | RF    | 0.86 | [0.78-0.91] | 0.0318 | 0.68 | 0.93 | 0.66 |
| Center_14 | ANOVA  | AB    | 0.85 | [0.78-0.92] | 0.0347 | 0.79 | 0.79 | 0.79 |
|           |        | AE    | 0.87 | [0.79-0.93] | 0.0377 | 0.81 | 0.88 | 0.8  |

|        |       |      |             |        |      |      |      |
|--------|-------|------|-------------|--------|------|------|------|
|        | LASSO | 0.87 | [0.79-0.94] | 0.0365 | 0.83 | 0.88 | 0.83 |
|        | LDA   | 0.88 | [0.81-0.94] | 0.0351 | 0.84 | 0.88 | 0.83 |
|        | LR    | 0.89 | [0.82-0.95] | 0.0339 | 0.85 | 0.88 | 0.84 |
|        | NB    | 0.87 | [0.78-0.93] | 0.0364 | 0.83 | 0.85 | 0.83 |
|        | RF    | 0.89 | [0.84-0.94] | 0.0244 | 0.85 | 0.88 | 0.85 |
|        | AB    | 0.85 | [0.76-0.91] | 0.0381 | 0.74 | 0.94 | 0.71 |
|        | AE    | 0.86 | [0.77-0.92] | 0.0383 | 0.74 | 0.91 | 0.72 |
| KW     | LASSO | 0.89 | [0.82-0.95] | 0.0337 | 0.85 | 0.85 | 0.85 |
|        | LDA   | 0.88 | [0.81-0.94] | 0.0324 | 0.77 | 0.94 | 0.75 |
|        | LR    | 0.89 | [0.82-0.95] | 0.0343 | 0.83 | 0.88 | 0.82 |
|        | NB    | 0.87 | [0.79-0.94] | 0.0356 | 0.81 | 0.88 | 0.8  |
|        | RF    | 0.9  | [0.85-0.93] | 0.021  | 0.76 | 0.91 | 0.74 |
|        | AB    | 0.86 | [0.8-0.92]  | 0.0309 | 0.77 | 0.94 | 0.75 |
|        | AE    | 0.83 | [0.76-0.9]  | 0.0372 | 0.74 | 0.85 | 0.73 |
| Relief | LASSO | 0.89 | [0.82-0.94] | 0.034  | 0.81 | 0.88 | 0.8  |
|        | LDA   | 0.89 | [0.83-0.94] | 0.03   | 0.83 | 0.88 | 0.82 |
|        | LR    | 0.89 | [0.82-0.95] | 0.0344 | 0.82 | 0.88 | 0.81 |
|        | NB    | 0.86 | [0.79-0.92] | 0.0349 | 0.82 | 0.85 | 0.82 |
|        | RF    | 0.9  | [0.85-0.94] | 0.021  | 0.83 | 0.88 | 0.82 |
|        | AB    | 0.86 | [0.8-0.92]  | 0.0324 | 0.78 | 0.94 | 0.76 |
|        | AE    | 0.86 | [0.78-0.92] | 0.0373 | 0.82 | 0.82 | 0.82 |
| RFE    | LASSO | 0.88 | [0.81-0.94] | 0.0348 | 0.8  | 0.88 | 0.79 |
|        | LDA   | 0.88 | [0.81-0.93] | 0.0315 | 0.78 | 0.94 | 0.76 |
|        | LR    | 0.88 | [0.81-0.94] | 0.0348 | 0.81 | 0.91 | 0.79 |
|        | NB    | 0.87 | [0.79-0.92] | 0.0349 | 0.88 | 0.79 | 0.89 |
|        | RF    | 0.9  | [0.85-0.94] | 0.0233 | 0.82 | 0.91 | 0.81 |
|        | AB    | 0.55 | [0.29-0.73] | 0.119  | 0.66 | 0.67 | 0.66 |
|        | AE    | 0.9  | [0.85-0.95] | 0.0253 | 0.87 | 1    | 0.87 |
| ANOVA  | LASSO | 0.65 | [0.58-0.74] | 0.0421 | 0.62 | 1    | 0.62 |
|        | LDA   | 0.75 | [0.64-0.88] | 0.0623 | 0.65 | 1    | 0.65 |
|        | LR    | 0.68 | [0.59-0.77] | 0.0457 | 0.62 | 1    | 0.61 |
|        | NB    | 0.48 | [0.42-0.55] | 0.0348 | 0.45 | 1    | 0.44 |
|        | RF    | 0.69 | [0.61-0.79] | 0.0493 | 0.61 | 1    | 0.61 |
|        | AB    | 0.43 | [0.34-0.51] | 0.0428 | 0.37 | 1    | 0.36 |
|        | AE    | 0.96 | [0.92-0.98] | 0.0154 | 0.93 | 1    | 0.93 |
| KW     | LASSO | 0.69 | [0.62-0.76] | 0.0362 | 0.64 | 1    | 0.64 |
|        | LDA   | 0.73 | [0.62-0.9]  | 0.0757 | 0.65 | 1    | 0.64 |
|        | LR    | 0.67 | [0.59-0.75] | 0.0427 | 0.62 | 1    | 0.61 |
|        | NB    | 0.53 | [0.39-0.73] | 0.0908 | 0.41 | 1    | 0.4  |
|        | RF    | 0.71 | [0.6-0.82]  | 0.054  | 0.58 | 1    | 0.57 |
| Relief | AB    | 0.53 | [0.35-0.75] | 0.106  | 0.36 | 1    | 0.35 |

|           |        |       |      |             |        |      |      |      |
|-----------|--------|-------|------|-------------|--------|------|------|------|
|           |        | AE    | 0.94 | [0.9-0.98]  | 0.0197 | 0.92 | 1    | 0.92 |
|           |        | LASSO | 0.72 | [0.61-0.87] | 0.0679 | 0.65 | 1    | 0.64 |
|           |        | LDA   | 0.82 | [0.71-0.91] | 0.0525 | 0.72 | 1    | 0.72 |
|           |        | LR    | 0.71 | [0.62-0.82] | 0.0527 | 0.64 | 1    | 0.64 |
|           |        | NB    | 0.48 | [0.42-0.56] | 0.0357 | 0.45 | 1    | 0.44 |
|           |        | RF    | 0.73 | [0.57-0.88] | 0.081  | 0.53 | 1    | 0.53 |
|           |        | AB    | 0.43 | [0-0.71]    | 0.2    | 0.58 | 0.67 | 0.58 |
|           |        | AE    | 0.94 | [0.88-0.99] | 0.0271 | 0.9  | 1    | 0.89 |
|           | RFE    | LASSO | 0.66 | [0.57-0.75] | 0.0436 | 0.61 | 1    | 0.61 |
|           |        | LDA   | 0.62 | [0.55-0.7]  | 0.0381 | 0.58 | 1    | 0.57 |
|           |        | LR    | 0.68 | [0.6-0.77]  | 0.0436 | 0.64 | 1    | 0.63 |
|           |        | NB    | 0.49 | [0.41-0.59] | 0.0452 | 0.44 | 1    | 0.43 |
|           |        | RF    | 0.72 | [0.57-0.83] | 0.069  | 0.52 | 1    | 0.51 |
|           |        | AB    | 0.78 | [0.71-0.85] | 0.0377 | 0.75 | 0.78 | 0.74 |
|           |        | AE    | 0.63 | [0.54-0.72] | 0.0465 | 0.53 | 0.76 | 0.5  |
|           | ANOVA  | LASSO | 0.72 | [0.63-0.81] | 0.0448 | 0.78 | 0.59 | 0.81 |
|           |        | LDA   | 0.7  | [0.61-0.79] | 0.0459 | 0.68 | 0.67 | 0.68 |
|           |        | LR    | 0.72 | [0.63-0.8]  | 0.0432 | 0.68 | 0.69 | 0.67 |
|           |        | NB    | 0.7  | [0.61-0.79] | 0.0466 | 0.79 | 0.55 | 0.83 |
|           |        | RF    | 0.77 | [0.71-0.84] | 0.0337 | 0.69 | 0.76 | 0.68 |
|           |        | AB    | 0.76 | [0.69-0.83] | 0.0378 | 0.72 | 0.78 | 0.71 |
|           |        | AE    | 0.65 | [0.55-0.74] | 0.0482 | 0.63 | 0.65 | 0.62 |
|           | KW     | LASSO | 0.73 | [0.64-0.81] | 0.0448 | 0.79 | 0.57 | 0.82 |
|           |        | LDA   | 0.69 | [0.61-0.79] | 0.0455 | 0.81 | 0.49 | 0.86 |
|           |        | LR    | 0.73 | [0.65-0.81] | 0.0429 | 0.78 | 0.57 | 0.81 |
|           |        | NB    | 0.69 | [0.6-0.78]  | 0.0471 | 0.79 | 0.55 | 0.83 |
|           |        | RF    | 0.73 | [0.65-0.8]  | 0.0374 | 0.57 | 0.82 | 0.53 |
| Center_16 |        | AB    | 0.68 | [0.59-0.77] | 0.0466 | 0.69 | 0.69 | 0.69 |
|           |        | AE    | 0.64 | [0.54-0.74] | 0.0489 | 0.63 | 0.63 | 0.63 |
|           | Relief | LASSO | 0.72 | [0.62-0.81] | 0.0469 | 0.82 | 0.55 | 0.86 |
|           |        | LDA   | 0.73 | [0.65-0.81] | 0.0411 | 0.64 | 0.76 | 0.62 |
|           |        | LR    | 0.71 | [0.62-0.8]  | 0.0474 | 0.83 | 0.51 | 0.88 |
|           |        | NB    | 0.71 | [0.62-0.8]  | 0.0459 | 0.65 | 0.73 | 0.64 |
|           |        | RF    | 0.78 | [0.7-0.85]  | 0.0354 | 0.69 | 0.8  | 0.67 |
|           |        | AB    | 0.77 | [0.69-0.84] | 0.0392 | 0.73 | 0.76 | 0.72 |
|           |        | AE    | 0.62 | [0.52-0.71] | 0.049  | 0.58 | 0.67 | 0.56 |
|           | RFE    | LASSO | 0.71 | [0.62-0.8]  | 0.0462 | 0.81 | 0.53 | 0.85 |
|           |        | LDA   | 0.71 | [0.62-0.8]  | 0.0476 | 0.71 | 0.71 | 0.7  |
|           |        | LR    | 0.7  | [0.6-0.8]   | 0.0483 | 0.64 | 0.73 | 0.63 |
|           |        | NB    | 0.68 | [0.59-0.76] | 0.0454 | 0.8  | 0.51 | 0.85 |
|           |        | RF    | 0.76 | [0.68-0.83] | 0.0366 | 0.59 | 0.86 | 0.54 |

|                  |        |       |             |             |        |      |      |      |
|------------------|--------|-------|-------------|-------------|--------|------|------|------|
| <b>Center_17</b> | ANOVA  | AB    | 0.74        | [0.66-0.81] | 0.0377 | 0.71 | 0.71 | 0.71 |
|                  |        | AE    | 0.66        | [0.58-0.74] | 0.0413 | 0.62 | 0.68 | 0.61 |
|                  |        | LASSO | 0.77        | [0.7-0.84]  | 0.0357 | 0.73 | 0.75 | 0.73 |
|                  |        | LDA   | 0.75        | [0.66-0.83] | 0.042  | 0.73 | 0.75 | 0.72 |
|                  |        | LR    | 0.75        | [0.68-0.82] | 0.0361 | 0.71 | 0.73 | 0.71 |
|                  |        | NB    | 0.73        | [0.66-0.81] | 0.0387 | 0.7  | 0.73 | 0.69 |
|                  |        | RF    | 0.78        | [0.71-0.84] | 0.0338 | 0.77 | 0.68 | 0.79 |
|                  | KW     | AB    | 0.69        | [0.62-0.77] | 0.0382 | 0.82 | 0.43 | 0.89 |
|                  |        | AE    | 0.73        | [0.65-0.81] | 0.0404 | 0.68 | 0.71 | 0.67 |
|                  |        | LASSO | 0.73        | [0.66-0.81] | 0.04   | 0.69 | 0.71 | 0.68 |
|                  |        | LDA   | 0.72        | [0.63-0.79] | 0.0413 | 0.69 | 0.71 | 0.68 |
|                  |        | LR    | 0.71        | [0.64-0.79] | 0.0378 | 0.6  | 0.79 | 0.56 |
|                  |        | NB    | 0.68        | [0.6-0.76]  | 0.0417 | 0.66 | 0.71 | 0.65 |
|                  |        | RF    | 0.77        | [0.7-0.84]  | 0.0352 | 0.68 | 0.79 | 0.66 |
|                  | Relief | AB    | 0.67        | [0.58-0.75] | 0.0412 | 0.56 | 0.76 | 0.52 |
|                  |        | AE    | 0.76        | [0.68-0.84] | 0.0396 | 0.68 | 0.79 | 0.66 |
|                  |        | LASSO | 0.74        | [0.66-0.81] | 0.0371 | 0.7  | 0.76 | 0.69 |
|                  |        | LDA   | 0.75        | [0.68-0.82] | 0.0372 | 0.68 | 0.75 | 0.67 |
|                  |        | LR    | 0.74        | [0.67-0.81] | 0.036  | 0.67 | 0.73 | 0.66 |
|                  |        | NB    | 0.68        | [0.6-0.77]  | 0.0439 | 0.8  | 0.57 | 0.85 |
|                  |        | RF    | 0.77        | [0.7-0.84]  | 0.0347 | 0.68 | 0.78 | 0.66 |
| RFE              | AB     | 0.69  | [0.61-0.76] | 0.0389      | 0.64   | 0.76 | 0.61 |      |
|                  | AE     | 0.76  | [0.68-0.84] | 0.0378      | 0.86   | 0.56 | 0.92 |      |
|                  | LASSO  | 0.73  | [0.65-0.8]  | 0.0391      | 0.67   | 0.75 | 0.65 |      |
|                  | LDA    | 0.75  | [0.67-0.82] | 0.0383      | 0.7    | 0.79 | 0.68 |      |
|                  | LR     | 0.74  | [0.66-0.81] | 0.0373      | 0.65   | 0.78 | 0.62 |      |
|                  | NB     | 0.69  | [0.61-0.77] | 0.0423      | 0.76   | 0.62 | 0.78 |      |
|                  | RF     | 0.77  | [0.7-0.84]  | 0.035       | 0.72   | 0.73 | 0.72 |      |
| <b>Center_18</b> | ANOVA  | AB    | 0.99        | [0.97-1]    | 0.0065 | 0.95 | 1    | 0.95 |
|                  |        | AE    | 0.96        | [0.92-0.99] | 0.0192 | 0.93 | 0.9  | 0.93 |
|                  |        | LASSO | 0.99        | [0.96-1]    | 0.0097 | 0.91 | 1    | 0.91 |
|                  |        | LDA   | 0.96        | [0.92-0.99] | 0.0165 | 0.95 | 0.9  | 0.95 |
|                  |        | LR    | 0.98        | [0.95-1]    | 0.0111 | 0.9  | 1    | 0.9  |
|                  |        | NB    | 0.96        | [0.93-0.99] | 0.0148 | 0.95 | 0.9  | 0.95 |
|                  |        | RF    | 0.95        | [0.88-1]    | 0.0331 | 0.96 | 0.9  | 0.96 |
|                  | KW     | AB    | 1           | [0.99-1]    | 0.0027 | 0.99 | 1    | 0.99 |
|                  |        | AE    | 0.98        | [0.96-1]    | 0.0106 | 0.91 | 1    | 0.91 |
|                  |        | LASSO | 0.99        | [0.97-1]    | 0.0075 | 0.94 | 1    | 0.93 |
|                  |        | LDA   | 0.98        | [0.96-1]    | 0.008  | 0.93 | 1    | 0.93 |
|                  |        | LR    | 0.99        | [0.96-1]    | 0.0099 | 0.92 | 1    | 0.92 |
|                  |        | NB    | 0.96        | [0.92-0.98] | 0.0151 | 0.87 | 1    | 0.86 |

|                  |        |       |             |             |             |        |      |      |
|------------------|--------|-------|-------------|-------------|-------------|--------|------|------|
| <b>Center_19</b> | Relief | RF    | 0.98        | [0.94-1]    | 0.015       | 0.86   | 1    | 0.86 |
|                  |        | AB    | 1           | [0.99-1]    | 0.0021      | 0.99   | 1    | 0.99 |
|                  |        | AE    | 0.98        | [0.95-1]    | 0.0114      | 0.91   | 1    | 0.9  |
|                  |        | LASSO | 0.98        | [0.95-1]    | 0.013       | 0.89   | 1    | 0.89 |
|                  |        | LDA   | 0.98        | [0.96-1]    | 0.0094      | 0.91   | 1    | 0.91 |
|                  |        | LR    | 0.98        | [0.95-1]    | 0.0137      | 0.87   | 1    | 0.87 |
|                  |        | NB    | 0.95        | [0.91-0.98] | 0.0178      | 0.86   | 1    | 0.85 |
|                  |        | RF    | 0.98        | [0.95-1]    | 0.0134      | 0.89   | 1    | 0.89 |
|                  | RFE    | AB    | 1           | [0.99-1]    | 0.0027      | 0.99   | 1    | 0.99 |
|                  |        | AE    | 0.98        | [0.96-1]    | 0.0113      | 0.91   | 1    | 0.91 |
|                  |        | LASSO | 0.98        | [0.96-1]    | 0.0102      | 0.92   | 1    | 0.92 |
|                  |        | LDA   | 0.99        | [0.97-1]    | 0.0079      | 0.93   | 1    | 0.92 |
|                  |        | LR    | 0.99        | [0.96-1]    | 0.01        | 0.91   | 1    | 0.9  |
|                  |        | NB    | 0.97        | [0.94-0.99] | 0.013       | 0.88   | 1    | 0.87 |
|                  |        | RF    | 0.98        | [0.96-1]    | 0.0096      | 0.91   | 1    | 0.91 |
|                  |        | ANOVA | AB          | 0.72        | [0.6-0.81]  | 0.0515 | 0.69 | 0.81 |
|                  | AE     |       | 0.73        | [0.62-0.82] | 0.0512      | 0.68   | 0.69 | 0.68 |
|                  | LASSO  |       | 0.69        | [0.6-0.77]  | 0.0424      | 0.71   | 0.69 | 0.71 |
|                  | LDA    |       | 0.74        | [0.65-0.83] | 0.046       | 0.71   | 0.72 | 0.71 |
|                  | LR     |       | 0.73        | [0.64-0.82] | 0.0461      | 0.63   | 0.78 | 0.62 |
|                  | NB     |       | 0.71        | [0.61-0.8]  | 0.0505      | 0.55   | 0.84 | 0.53 |
|                  | RF     |       | 0.79        | [0.7-0.88]  | 0.0445      | 0.8    | 0.75 | 0.8  |
|                  | KW     |       | AB          | 0.68        | [0.57-0.78] | 0.0539 | 0.59 | 0.72 |
|                  |        | AE    | 0.72        | [0.63-0.82] | 0.0486      | 0.67   | 0.75 | 0.67 |
|                  |        | LASSO | 0.74        | [0.65-0.81] | 0.0398      | 0.62   | 0.81 | 0.61 |
|                  |        | LDA   | 0.73        | [0.62-0.81] | 0.05        | 0.68   | 0.72 | 0.68 |
|                  |        | LR    | 0.75        | [0.66-0.83] | 0.0413      | 0.62   | 0.84 | 0.6  |
|                  |        | NB    | 0.72        | [0.62-0.8]  | 0.0456      | 0.53   | 0.84 | 0.51 |
| RF               |        | 0.78  | [0.71-0.86] | 0.0387      | 0.71        | 0.72   | 0.71 |      |
| Relief           |        | AB    | 0.69        | [0.59-0.78] | 0.0498      | 0.68   | 0.72 | 0.68 |
|                  | AE     | 0.68  | [0.58-0.77] | 0.0488      | 0.61        | 0.72   | 0.6  |      |
|                  | LASSO  | 0.74  | [0.65-0.82] | 0.0415      | 0.6         | 0.88   | 0.58 |      |
|                  | LDA    | 0.76  | [0.67-0.85] | 0.0448      | 0.64        | 0.81   | 0.63 |      |
|                  | LR     | 0.74  | [0.65-0.82] | 0.0427      | 0.61        | 0.81   | 0.6  |      |
|                  | NB     | 0.69  | [0.6-0.79]  | 0.0485      | 0.59        | 0.72   | 0.58 |      |
|                  | RF     | 0.78  | [0.7-0.85]  | 0.0388      | 0.69        | 0.84   | 0.67 |      |
|                  | RFE    | AB    | 0.71        | [0.61-0.8]  | 0.0495      | 0.58   | 0.81 | 0.57 |
| AE               |        | 0.7   | [0.6-0.8]   | 0.0503      | 0.68        | 0.69   | 0.68 |      |
| LASSO            |        | 0.76  | [0.67-0.84] | 0.0432      | 0.63        | 0.78   | 0.62 |      |
| LDA              |        | 0.75  | [0.64-0.84] | 0.0489      | 0.64        | 0.78   | 0.62 |      |
| LR               |        | 0.74  | [0.64-0.82] | 0.0437      | 0.54        | 0.84   | 0.52 |      |



---

|    |      |             |        |      |      |      |
|----|------|-------------|--------|------|------|------|
| NB | 0.72 | [0.63-0.8]  | 0.0446 | 0.53 | 0.84 | 0.5  |
| RF | 0.77 | [0.69-0.86] | 0.0418 | 0.65 | 0.78 | 0.64 |

---
